# Supplementary material for: Identification of multidentate tyrosyl-DNA phosphodiesterase 1 (TDP1) inhibitors that simultaneously access the DNA, protein and catalytic-binding sites by oxime diversification
Source: Royal Society of Chemistry journal article supplement (doi:10.1039/d2cb00230b), 2023-01-01
Supplement: d2cb00230b1.pdf [file d2cb00230b1.pdf]

**Electronic supplementary information (ESI)**

**Identification of multidentate tyrosyl-DNA phosphodiesterase 1 (TDP1) inhibitors that simultaneously access the DNA, protein and catalytic-binding sites by oxime diversification**

Xue Zhi Zhao,<sup>a\*</sup> Wenjie Wang,<sup>b</sup> George T. Lountos,<sup>c</sup> Evgeny Kiselev,<sup>b</sup> Joseph E. Tropea,<sup>d</sup> Danielle Needle,<sup>d</sup> Yves Pommier<sup>b</sup> and Terrence R. Burke, Jr.<sup>a</sup>

<sup>a</sup>Chemical Biology Laboratory, Center for Cancer Research, National Cancer Institute, National Institutes of Health, Frederick, MD, USA.

<sup>b</sup>Developmental Therapeutics Branch & Laboratory of Molecular Pharmacology, Center for Cancer Research, National Cancer Institute, National Institutes of Health, Bethesda, MD, USA.

<sup>c</sup>Basic Science Program, Frederick National Laboratory for Cancer Research, Frederick, MD, USA.

<sup>d</sup>Center for Structural Biology, Center for Cancer Research, National Cancer Institute, Frederick, MD, USA.

Correspondence\*:

Xue Zhi Zhao

[xuezhi.zhao@nih.gov](mailto:xuezhi.zhao@nih.gov)

## Table of Content

| Contents                                                                                                                                                                                                                                   | Page |
|--------------------------------------------------------------------------------------------------------------------------------------------------------------------------------------------------------------------------------------------|------|
| I. SYNTHETIC PROCEDURES                                                                                                                                                                                                                    |      |
| 1. General Synthetic Procedures .....                                                                                                                                                                                                      | S10  |
| 1.1 General procedure A. Mitsunobu reaction to prepare phthalimide protected compounds ( <b>11</b> and <b>19</b> ) .....                                                                                                                   | S10  |
| 1.2 General procedure B. Groebke-Blackburn-Bienayme (GBBR) multicomponent reactions to prepare imidazopyridines ( <b>14</b> , <b>18</b> , <b>24a-e</b> , <b>29a,b</b> and <b>32a-c</b> ).....                                              | S11  |
| 1.3 General procedure C. Deprotection of phthalimide to prepare aminoxy compounds ( <b>15</b> and <b>20</b> ) .....                                                                                                                        | S11  |
| 1.4 General procedure D. Deprotection of methyl ester to prepare imidazopyridines ( <b>5</b> , <b>6</b> , <b>25a-e</b> , and <b>9a-c</b> ). .....                                                                                          | S11  |
| 1.5 General procedure E. Reaction of aminoxy compounds and aldehydes to prepare ( <i>Z</i> )- and ( <i>E</i> )-isomers of oximes ( <b>5-D1</b> , <b>5-P3</b> , <b>6-D1</b> , <b>6-E6</b> , <b>6-B7</b> , <b>6-P3</b> , <b>6-M10</b> )..... | S12  |
| 1.6 General procedure F. Cu(I)-catalyzed azide-alkyne cycloaddition (CuAAC) to prepare triazole compounds ( <b>7a-e</b> ). .....                                                                                                           | S12  |
| 1.7 General procedure G. Deprotection of tert-butyl protection to prepare acids ( <b>8a,b</b> ) using TFA. ....                                                                                                                            | S12  |
| 1.8 General procedure H. Preparation of aldehydes ( <b>27a-c</b> ). .....                                                                                                                                                                  | S11  |
| 2. Preparation of aminoxy-labelled imidazopyridine ( <b>5</b> ).....                                                                                                                                                                       | S11  |

|                                                                                                                                                          |     |
|----------------------------------------------------------------------------------------------------------------------------------------------------------|-----|
| Scheme S1. Synthesis of aminoxy-labelled imidazopyridine <b>5</b> . .....                                                                                | S13 |
| 2.1 Preparation of 2-((6-aminopyridin-3-yl)methoxy)isoindoline-1,3-dione ( <b>11</b> ). .....                                                            | S13 |
| 2.2 Preparation of methyl 4-((6-(((1,3-dioxoisoindolin-2-yl)oxy)methyl)-2-phenylimidazo[1,2-a]pyridin-3-yl)amino)benzoate ( <b>14</b> ). .....           | S14 |
| 2.3 Preparation of methyl 4-((6-((aminoxy)methyl)-2-phenylimidazo[1,2-a]pyridin-3-yl)amino)benzoate ( <b>15</b> ). .....                                 | S14 |
| 2.4 Preparation of 4-((6-((aminoxy)methyl)-2-phenylimidazo[1,2-a]pyridin-3-yl)amino)benzoic acid ( <b>5</b> ). .....                                     | S15 |
| 3. Preparation of aminoxy-labelled imidazopyridine ( <b>6</b> ).....                                                                                     | S15 |
| Scheme S2. Synthesis of aminoxy-labelled imidazopyridine <b>6</b> . .....                                                                                | S16 |
| 3.1 Preparation of methyl 4-((2-(4-(hydroxymethyl)phenyl)-7-phenylimidazo[1,2-a]pyridin-3-yl)amino)benzoate ( <b>18</b> ). .....                         | S16 |
| 3.2 Preparation of methyl 4-((2-(4-(((1,3-dioxoisoindolin-2-yl)oxy)methyl)phenyl)-7-phenylimidazo[1,2-a]pyridin-3-yl)amino)benzoate ( <b>19</b> ). ..... | S17 |
| 3.3 Preparation of methyl 4-((2-(4-((aminoxy)methyl)phenyl)-7-phenylimidazo[1,2-a]pyridin-3-yl)amino)benzoate ( <b>20</b> ). .....                       | S17 |
| 3.4 Preparation of 4-((2-(4-((aminoxy)methyl)phenyl)-7-phenylimidazo[1,2-a]pyridin-3-yl)amino)benzoic acid ( <b>6</b> ). .....                           | S18 |
| 4. Preparation of oximes ( <b>5-Y</b> and <b>6-Y</b> ) .....                                                                                             | S18 |

4.1 Preparation of (Z)-4-((6-(((4-(5-cyanopyridin-2-yl)benzylidene)amino)oxy)methyl)-2-phenylimidazo[1,2-a]pyridin-3-yl)amino)benzoic acid [(Z)-5-D1] and (E)-4-((6-(((4-(5-cyanopyridin-2-yl)benzylidene)amino)oxy)methyl)-2-phenylimidazo[1,2-a]pyridin-3-yl)amino)benzoic acid [(E)-5-D1] ..... S18

4.2 Preparation of (Z)-4-((6-(((4-((6-methylpyrazin-2-yl)oxy)benzylidene)amino)oxy)methyl)-2-phenylimidazo[1,2-a]pyridin-3-yl)amino)benzoic acid [(Z)-5-P3] and (E)-4-((6-(((4-((6-methylpyrazin-2-yl)oxy)benzylidene)amino)oxy)methyl)-2-phenylimidazo[1,2-a]pyridin-3-yl)amino)benzoic acid [(E)-5-P3]. ..... S19

4.3 Preparation of (Z)-4-((2-(4-(((4-(5-cyanopyridin-2-yl)benzylidene)amino)oxy)methyl)phenyl)-7-phenylimidazo[1,2-a]pyridin-3-yl)amino)benzoic acid [(Z)-6-D1] and (E)-4-((2-(4-(((4-(5-Cyanopyridin-2-yl)benzylidene)amino)oxy)methyl)phenyl)-7-phenylimidazo[1,2-a]pyridin-3-yl)amino)benzoic acid [(E)-6-D1]. ..... S20

4.4 Preparation of (Z)-4-((7-phenyl-2-(4-(((4-(pyrazin-2-yl)benzylidene)amino)oxy)methyl)phenyl)imidazo[1,2-a]pyridin-3-yl)amino)benzoic acid [(Z)-6-E6] and (E)-4-((7-phenyl-2-(4-(((4-(pyrazin-2-yl)benzylidene)amino)oxy)methyl)phenyl)imidazo[1,2-a]pyridin-3-yl)amino)benzoic acid [(E)-6-E6]. ..... S21

4.5 Preparation of (Z)-4-((2-(4-(((4-(2-oxopyrrolidin-1-yl)benzylidene)amino)oxy)methyl)phenyl)-7-phenylimidazo[1,2-a]pyridin-3-yl)amino)benzoic acid [(Z)-6-B7] and (E)-4-((2-(4-(((4-(2-oxopyrrolidin-1-

*yl)benzylidene)amino)oxy)methyl)phenyl)-7-phenylimidazo[1,2-a]pyridin-3-yl)amino)benzoic acid [(E)-6-B7].* ..... S23

4.6 Preparation of *(Z)-4-((2-(4-(((4-((6-methylpyrazin-2-yl)oxy)benzylidene)amino)oxy)methyl)phenyl)-7-phenylimidazo[1,2-a]pyridin-3-yl)amino)benzoic acid [(Z)-6-P3] and (E)-4-((2-(4-(((4-((6-methylpyrazin-2-yl)oxy)benzylidene)amino)oxy)methyl)phenyl)-7-phenylimidazo[1,2-a]pyridin-3-yl)amino)benzoic acid [(E)-6-P3].* ..... S24

4.7 Preparation of *(Z)-4-((2-(4-(((1,1'-biphenyl]-4-ylmethylene)amino)oxy)methyl)phenyl)-7-phenylimidazo[1,2-a]pyridin-3-yl)amino)benzoic acid [(Z)-6-M10] and (E)-4-((2-(4-(((1,1'-biphenyl]-4-ylmethylene)amino)oxy)methyl)phenyl)-7-phenylimidazo[1,2-a]pyridin-3-yl)amino)benzoic acid [(E)-6-M10].* ..... S25

5. Preparation of triazole-containing imidazopyridines (**7a-e**) ..... S26

Scheme S3. Synthesis of triazole-containing imidazopyridines **7a-e**. ..... S26

5.1 Preparation of *6-(4-(hydroxymethyl)phenyl)nicotinonitrile (21)*. ..... S27

5.2 Preparation of *6-(4-(bromomethyl)phenyl)nicotinonitrile (22)*. ..... S27

5.3 Preparation of *6-(4-(azidomethyl)phenyl)nicotinonitrile (23)*. ..... S28

5.4 Preparation of *methyl 4-((6-ethynyl-2-phenylimidazo[1,2-a]pyridin-3-yl)amino)benzoate (24a)*. ..... S28

5.5 Preparation of *methyl 4-((2-(4-ethynylphenyl)imidazo[1,2-a]pyridin-3-yl)amino)benzoate (24b)*. ..... S28

|                                                                                                                                                                 |     |
|-----------------------------------------------------------------------------------------------------------------------------------------------------------------|-----|
| 5.6 Preparation of methyl 4-((2-(4-(prop-2-yn-1-yloxy)phenyl)imidazo[1,2-a]pyridin-3-yl)amino)benzoate ( <b>24c</b> ). .....                                    | S29 |
| 5.7 Preparation of methyl 4-((2-(4-ethynylphenyl)-7-phenylimidazo[1,2-a]pyridin-3-yl)amino)benzoate ( <b>24d</b> ). .....                                       | S29 |
| 5.8 Preparation of methyl 4-((7-phenyl-2-(4-(prop-2-yn-1-yloxy)phenyl)imidazo[1,2-a]pyridin-3-yl)amino)benzoate ( <b>24e</b> ). .....                           | S30 |
| 5.9 Preparation of 4-((6-ethynyl-2-phenylimidazo[1,2-a]pyridin-3-yl)amino)benzoic acid ( <b>25a</b> ).<br>.....                                                 | S30 |
| 5.10 Preparation of 4-((2-(4-ethynylphenyl)imidazo[1,2-a]pyridin-3-yl)amino)benzoic acid ( <b>25b</b> ).<br>.....                                               | S31 |
| 5.11 Preparation of 4-((2-(4-(prop-2-yn-1-yloxy)phenyl)imidazo[1,2-a]pyridin-3-yl)amino)benzoic acid ( <b>25c</b> ). .....                                      | S31 |
| 5.12 Preparation of 4-((2-(4-ethynylphenyl)-7-phenylimidazo[1,2-a]pyridin-3-yl)amino)benzoic acid ( <b>25d</b> ). .....                                         | S32 |
| 5.13 Preparation of 4-((7-phenyl-2-(4-(prop-2-yn-1-yloxy)phenyl)imidazo[1,2-a]pyridin-3-yl)amino)benzoic acid ( <b>25e</b> ). .....                             | S32 |
| 5.14 Preparation of 4-((6-(1-(4-(5-cyanopyridin-2-yl)benzyl)-1H-1,2,3-triazol-4-yl)-2-phenylimidazo[1,2-a]pyridin-3-yl)amino)benzoic acid ( <b>7a</b> ). .....  | S33 |
| 5.15 Preparation of 4-((2-(4-(1-(4-(5-cyanopyridin-2-yl)benzyl)-1H-1,2,3-triazol-4-yl)phenyl)imidazo[1,2-a]pyridin-3-yl)amino)benzoic acid ( <b>7b</b> ). ..... | S33 |

|                                                                                                                                                                                                                                                |     |
|------------------------------------------------------------------------------------------------------------------------------------------------------------------------------------------------------------------------------------------------|-----|
| 5.16 Preparation of 4-((2-(4-((1-(4-(5-cyanopyridin-2-yl)benzyl)-1H-1,2,3-triazol-4-yl)methoxy)phenyl)imidazo[1,2-a]pyridin-3-yl)amino)benzoic acid ( <b>7c</b> ). .....                                                                       | S34 |
| 5.17 Preparation of 4-((2-(4-(1-(4-(5-cyanopyridin-2-yl)benzyl)-1H-1,2,3-triazol-4-yl)phenyl)-7-phenylimidazo[1,2-a]pyridin-3-yl)amino)benzoic acid ( <b>7d</b> ). .....                                                                       | S34 |
| 5.18 Preparation of 4-((2-(4-((1-(4-(5-cyanopyridin-2-yl)benzyl)-1H-1,2,3-triazol-4-yl)methoxy)phenyl)-7-phenylimidazo[1,2-a]pyridin-3-yl)amino)benzoic acid ( <b>7e</b> ). .....                                                              | S35 |
| 6. Preparation of ether-linked imidazopyridines ( <b>8a,b</b> ).....                                                                                                                                                                           | S35 |
| Scheme S4. Synthesis of ether-linked imidazopyridines ( <b>8a,b</b> ). .....                                                                                                                                                                   | S36 |
| 6.1 Preparation of 6-(4-((4-formylphenethoxy)methyl)phenyl)nicotinonitrile ( <b>27a</b> ). ....                                                                                                                                                | S36 |
| 6.2 Preparation of <i>tert-butyl 4-isocyanobenzoate</i> ( <b>28</b> ). .....                                                                                                                                                                   | S36 |
| 6.3 Preparation of <i>tert-butyl 4-((2-(4-(2-((4-(5-((<math>\lambda^2</math>-azaneylidene)-<math>\lambda^3</math>-methyl)pyridin-2-yl)phenyl)methoxy)ethyl)phenyl)imidazo[1,2-a]pyridin-3-yl)amino)benzoate</i> ( <b>29a</b> ). ...            | S37 |
| 6.4 Preparation of 4-((2-(4-(2-((4-(5-(( $\lambda^2$ -azaneylidene)- $\lambda^3$ -methyl)pyridin-2-yl)phenyl)methoxy)ethyl)phenyl)imidazo[1,2-a]pyridin-3-yl)amino)benzoic acid ( <b>8a</b> ). .....                                           | S38 |
| 6.5 Preparation of <i>tert-butyl 4-((2-(4-(2-((4-(5-((<math>\lambda^3</math>-azaneylidene)-<math>\lambda^3</math>-methyl)pyridin-2-yl)phenyl)methoxy)ethyl)phenyl)-7-phenylimidazo[1,2-a]pyridin-3-yl)amino)benzoate</i> ( <b>29b</b> ). ..... | S39 |
| 6.6 Preparation of 4-((2-(4-(2-((4-(5-(( $\lambda^2$ -azaneylidene)- $\lambda^3$ -methyl)pyridin-2-yl)phenyl)methoxy)ethyl)phenyl)-7-phenylimidazo[1,2-a]pyridin-3-yl)amino)benzoic acid ( <b>8b</b> ). .....                                  | S39 |

|                                                                                                                                                      |     |
|------------------------------------------------------------------------------------------------------------------------------------------------------|-----|
| 7. Preparation of phthalic acid-containing imidazopyridines ( <b>9a-c</b> ) .....                                                                    | S40 |
| Scheme S5. Synthesis of phthalic acid-containing imidazopyridines <b>9a-c</b> . .....                                                                | S41 |
| 7.1 Preparation of <i>dimethyl 4-((2,7-diphenylimidazo[1,2-a]pyridin-3-yl)amino)phthalate (32a)</i> .<br>.....                                       | S41 |
| 7.2 Preparation of <i>4-((2,7-diphenylimidazo[1,2-a]pyridin-3-yl)amino)phthalic acid (9a)</i> . ..<br>.....                                          | S41 |
| 7.3 Preparation of <i>4-(2-([1,1'-biphenyl]-4-ylmethoxy)ethyl)benzaldehyde (27b)</i> . .....                                                         | S42 |
| 7.4 Preparation of <i>4-((2-(4-(2-([1,1'-biphenyl]-4-ylmethoxy)ethyl)phenyl)-7-phenylimidazo[1,2-a]pyridin-3-yl)amino)phthalic acid (9b)</i> . ..... | S42 |
| 7.5 Preparation of <i>4-(2-((4-(pyridin-2-yl)benzyl)oxy)ethyl)benzaldehyde (27b)</i> . .....                                                         | S43 |
| 7.6 Preparation of <i>4-((7-phenyl-2-(4-(2-((4-(pyridin-2-yl)benzyl)oxy)ethyl)phenyl)imidazo[1,2-a]pyridin-3-yl)amino)phthalic acid (9c)</i> . ..... | S43 |
| II. BIOLOGICAL EVALUATION .....                                                                                                                      | S44 |
| 1. TDP1 inhibition assay .....                                                                                                                       | S44 |
| 2. Survival curve and cytotoxicity .....                                                                                                             | S45 |
| 3. Synergistic effect of TDP1 inhibitors with camptothecin (CPT) in human colon cancer cell<br>line HCT116 .....                                     | S45 |
| III. X-RAY CRYSTALLOGRAPHY .....                                                                                                                     | S46 |
| 1. Protein expression, purification, and crystallization .....                                                                                       | S46 |
| 2. Data collection, structure determination, and refinement .....                                                                                    | S46 |



## TABLES

|                                                                                                                         |     |
|-------------------------------------------------------------------------------------------------------------------------|-----|
| Table S1. Library of aldehydes using in our oxime library preparation with their structures and the SMILES strings..... | S47 |
| Table S2. Inhibition values of oximes 5-Y determined in gel-based TDP1 binding assays..                                 | S65 |
| Table S3. Inhibition values of oximes 6-Y determined in gel-based TDP1 binding assays..                                 | S67 |
| Table S4. Crystallographic data collection and refinement statistics .....                                              | S69 |
| Table S5. TDP1 selectivity of lead compounds over TDP2 using gel-based assays .....                                     | S70 |

## FIGURES

|                                                                                     |     |
|-------------------------------------------------------------------------------------|-----|
| Fig. S1 Primary screen of oximes 5-Y and 6-Y in gel-based TDP1 binding assays ..... | S71 |
| Fig. S2 Secondary screen of oximes 5-Y and 6-Y in gel-based TDP1 binding assays ..  | S72 |
| Fig. S3 TDP1 catalytic reaction and representative gel images.....                  | S73 |
| Fig. S4 TDP1 catalytic reaction and representative gel images.....                  | S74 |
| Fig. S5 TDP1 and TDP2 catalytic reaction.....                                       | S75 |
| Fig. S6 Cytotoxicity of selective TDP1 inhibitors.....                              | S75 |
| Fig. S7 Synergistic effect of selective TDP1 inhibitors.....                        | S76 |
| REFERENCES .....                                                                    | S76 |

## I. SYNTHETIC PROCEDURES

### 1. General Synthetic Procedures

Proton ( $^1\text{H}$ ) and carbon ( $^{13}\text{C}$ ) NMR spectra were recorded on a Varian 400 MHz spectrometer or a Varian 500 MHz spectrometer and are reported in ppm relative to TMS and referenced to the solvent in which the spectra were collected. Solvent was removed by rotary evaporation under reduced pressure, and anhydrous solvents were obtained commercially and used without further drying. Room temperature (rt) is around 22 °C. Purification by silica gel chromatography was performed using Teledyne Rf200i CombiFlash with EtOAc–hexanes or MeOH-DCM solvent systems. Preparative high pressure liquid chromatography (HPLC) was conducted using a Waters Prep 2535 system having photodiode array detection and Phenomenex C18 columns (catalogue no. 00G4436-P0-AX, 250 mm  $\times$  21.2 mm 10  $\mu\text{m}$  particle size, 110 Å pore) at a flow rate of 20 mL/min. Binary solvent systems consisting of A = 0.1% aqueous TFA and B = 0.1% TFA in acetonitrile were employed with gradients as indicated. Products were obtained as amorphous solids following lyophilization. Electrospray ionization-mass spectrometric (ESI-MS) were acquired with an Agilent LC/MSD system equipped with a multimode ion source. Dual ionization mass spectrometric (DUIS-MS) were acquired with a Shimadzu LCMS system equipped with dual ionization source, electrospray ionization (ESI) and atmospheric pressure chemical ionization (APCI). High resolution mass spectrometric (HRMS) were acquired by LC/MS-ESI using LTQ-Orbitrap-XL at 30K resolution.

**1.1 General procedure A. Mitsunobu reaction to prepare phthalimide protected compounds (11 and 19).**<sup>1</sup> Diisopropyl (*E*)-diazene-1,2-dicarboxylate (DIAD, 7 mmol) was added dropwise to the mixture of alcohols (**10** or **18**, 6 mmol), 2-hydroxyisoindoline-1,3-dione (6.5 mmol) and  $\text{PPh}_3$  (7 mmol) in THF (20 mL) at 0 °C. The reaction mixture was stirred (rt, 18

h) and concentrated. The residue was stirred with MeOH (5 mL) (rt, 1 h). The suspension was filtered and washed by MeOH (10 mL). The solid was collected to afford the phthalimide protected products (**11** or **19**) separately.

**1.2 General procedure B. Groebke-Blackburn-Bienayme (GBBR) multicomponent reactions to prepare imidazopyridines (14, 18, 24a-e, 29a,b and 32a-c).**<sup>2-6</sup> Pyridine-2-amines (6 mmol), aldehydes (6 mmol), and acetic acid (12 mmol) were mixed in MeOH (5 mL) and THF (5 mL) (rt, 20 min). Isonitrile (6 mmol) was added. The reaction solution was stirred (80 °C, 4 h / rt, 24 h). The final suspension was filtered and washed by hexanes and water. The solid product was collected to provide final imidazo[1,2-*a*]pyridines (**14, 18, 24a-e, 29a,b** and **32a-c**) separately.

**1.3 General procedure C. Deprotection of phthalimide to prepare aminoxy compounds (15 and 20).** Phthalimide protected compounds (**14** or **19**, 1 mmol) was dissolved in DCM (100 mL). Hydrazine hydrate (5 mmol) was added. The suspension was stirred (rt, 5 h). The suspension was filtered and washed by DCM. The filtrate was concentrated. The residue was collected to afford aminoxy-labelled compounds (**15** or **20**) separately.

**1.4 General procedure D. Deprotection of methyl ester to prepare imidazopyridines (5, 6, 25a-e, and 9a-c).** Methyl esters (**15, 20, 24a-e,** and **32a-c**, 1 mmol) was suspended in MeOH (4 mL) in a microwave tube. NaOH (4 mL, aq. 2M) was added. The suspension in the sealed tube was microwave-heated (100 °C, 4 h). The reaction mixture was cooled to rt and acidified by HCl (aq. 2N). The formed suspension was filtered and washed by water and hexanes. The solid was collected to afford the carboxylic acids (**5, 6, 25a-e,** and **9a-c**) separately after HPLC purification.

**1.5 General procedure E. Reaction of aminoxylys and aldehydes to prepare (Z)- and (E)-isomers of oximes (5-D1, 5-P3, 6-D1, 6-E6, 6-B7, 6-P3, 6-M10).** Aminoxylys (**5** or **6**, 0.2 mmol) and lead aldehydes (**B7**, **D1**, **E6**, **P3** or **M10**, 0.2 mmol) was mixed in DMSO (1 mL). Acetic acid (1 mmol) was added. The reaction mixture was stirred (rt, 18 h). The formed suspension was filtered and washed by MeOH. The white solid was collected to afforded oximes (**5-Y** or **6-Y**), which were purified by HPLC to afforded (Z)- and (E)-isomers of oximes (**5-D1**, **5-P3**, **6-D1**, **6-E6**, **6-B7**, **6-P3**, **6-M10**) separately.

**1.6 General procedure F. Cu(I)-catalyzed azide–alkyne cycloaddition (CuAAC) to prepare triazole compounds (7a-e).**<sup>7</sup> Alkynes (**25a-e**, 0.1 mmol, 1 mg in 10  $\mu$ L DMSO), azide (**23**, 0.1 mmol, 1 mg in 10  $\mu$ L DMSO) and tris((1-benzyl-1H-1,2,3-triazol-4-yl)methyl)amine (TBTA, 0.04 mmol, 1 mg in 10  $\mu$ L DMSO) were mixed in a vial with a stirrer bar. Sodium ascorbate (0.1 mmol, 1 mg in 10  $\mu$ L H<sub>2</sub>O) and CuSO<sub>4</sub>·5H<sub>2</sub>O (0.02 mmol, 1 mg in 10  $\mu$ L water) were added. The reaction was diluted in DMSO (2 mL). The formed bright yellow solution was stirred at rt overnight under Argon. A yellow suspension was formed. The reaction mixture was dissolved in DMSO and purified by HPLC to afford triazole compounds (**7a-e**) separately.

**1.7 General procedure G. Deprotection of tert-butyl protection to prepare acids (8a,b) using TFA.** tert-Butyl ester (**29a,b**, 0.06 mmol) was mixed with the cocktail of TFA/H<sub>2</sub>O/TIS (90/5/5, 0.5 mL). The reaction mixture was stirred (rt, 1.5 h). The final mixture was diluted by MeOH (5 mL) and filtered by a PTFE filter (PHENEX, 0.20  $\mu$ m pore). The clear solution was purified by preparative HPLC as the describe in general experiments. After lyophilized the correct HPLC fraction, the acids (**8a,b**) were afforded.

**1.8 General procedure H. Preparation of aldehydes (27a-c).**<sup>8</sup> The mixture of 4-(2-hydroxyethyl)benzaldehyde (**26**, 2 mmol), bromide (**22**, **30a,b**, 2 mmol) and Hunig's base DIEA (2.5 mmol) was heated (150 °C, 1 h). The brown reaction suspension was cooled down to rt and purified by silica gel chromatograph using CombiFalsh. Aldehydes (**27a-c**) were afforded as white solids.

## 2. Preparation of aminoxy-labelled imidazopyridine (**5**)

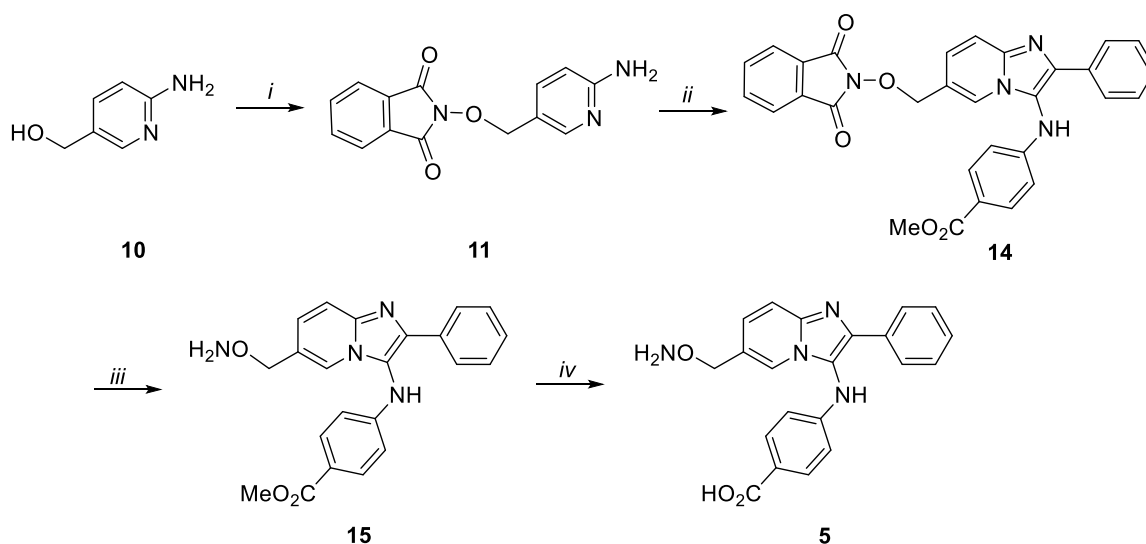

**Scheme S1.** Synthesis of aminoxy-labelled imidazopyridine **5**. *Reagents and conditions:* (i) *N*-hydroxyphthalimide, Ph<sub>3</sub>P, DIAD, THF; (ii) PhCHO (**12a**), CNPhCO<sub>2</sub>Me (**13**), HOAc, MeOH, 80 °C; (iii) NH<sub>2</sub>NH<sub>2</sub>-H<sub>2</sub>O, DCM; (iv) NaOH (aq. 2N), MeOH.

### 2.1 Preparation of 2-((6-aminopyridin-3-yl)methoxy)isoindoline-1,3-dione (**11**).

Treatment of commercially available (6-aminopyridin-3-yl)methanol **10** as outlined in general procedure A provided 2-((6-aminopyridin-3-yl)methoxy)isoindoline-1,3-dione (**11**) as a red solid (54 % yield). <sup>1</sup>H NMR (400 MHz, DMSO-*d*<sub>6</sub>) δ 7.94 – 7.91 (m, 1H), 7.85 (s, 4H), 7.49 (dd, *J* = 8.5, 2.4 Hz, 1H), 6.43 (dd, *J* = 8.5, 0.8 Hz, 1H), 6.14 (s, 2H), 4.97 (s, 2H). <sup>13</sup>C NMR (101 MHz,

DMSO-*d*<sub>6</sub>)  $\delta$  163.68, 160.83 (2C), 150.32 (2C), 139.57, 135.25 (2C), 128.95, 123.69 (2C), 117.68, 108.00, 77.57. DUIS-MS: *m/z*: 519.2 (MH<sup>+</sup>).

**2.2 Preparation of methyl 4-((6-(((1,3-dioxoisindolin-2-yl)oxy)methyl)-2-phenylimidazo[1,2-a]pyridin-3-yl)amino)benzoate (14).** Treatment of 2-((6-aminopyridin-3-yl)methoxy)isindoline-1,3-dione (**11**), benzaldehyde (**12a**) and methyl 4-isocyanobenzoate (**13**)<sup>6</sup> as outlined in general procedure B (80 °C, 4 h) provided methyl 4-((6-(((1,3-dioxoisindolin-2-yl)oxy)methyl)-2-phenylimidazo[1,2-a]pyridin-3-yl)amino)benzoate (**14**) as a red solid (38 % yield). <sup>1</sup>H NMR (500 MHz, DMSO-*d*<sub>6</sub>)  $\delta$  8.89 (s, 1H), 8.24 (s, 1H), 7.98 (d, *J* = 7.7 Hz, 2H), 7.83 (d, *J* = 2.5 Hz, 4H), 7.71 (d, *J* = 9.2 Hz, 1H), 7.67 (d, *J* = 8.5 Hz, 2H), 7.54 (dd, *J* = 9.2, 1.7 Hz, 1H), 7.39 (t, *J* = 7.6 Hz, 2H), 7.30 (t, *J* = 7.4 Hz, 1H), 6.51 (s, 2H), 5.22 (s, 2H), 3.77 (s, 3H). <sup>13</sup>C NMR (126 MHz, DMSO-*d*<sub>6</sub>)  $\delta$  166.47, 163.59 (2C), 150.57, 142.25, 138.52, 135.24 (2C), 133.67, 131.83 (2C), 129.04 (2C), 128.88 (2C), 128.27, 128.09, 126.90 (2C), 124.51, 123.72 (2C), 120.39, 119.87, 118.52, 117.55, 112.90 (2C), 77.02, 51.97. ESI-MS *m/z*: 519.10 (MH<sup>+</sup>).

**2.3 Preparation of methyl 4-((6-((aminooxy)methyl)-2-phenylimidazo[1,2-a]pyridin-3-yl)amino)benzoate (15).**

Treatment of methyl 4-((6-(((1,3-dioxoisindolin-2-yl)oxy)methyl)-2-phenylimidazo[1,2-a]pyridin-3-yl)amino)benzoate (**14**) as outlined in general procedure C (rt, 5 h) provided methyl 4-((6-((aminooxy)methyl)-2-phenylimidazo[1,2-a]pyridin-3-yl)amino)benzoate (**15**) as a yellow solid (95 % yield). <sup>1</sup>H NMR (400 MHz, DMSO-*d*<sub>6</sub>)  $\delta$  8.91 (s, 1H), 8.00 (d, *J* = 7.7 Hz, 2H), 7.94 (s, 1H), 7.78 (d, *J* = 8.4 Hz, 2H), 7.65 (d, *J* = 9.2 Hz, 1H), 7.40 (t, *J* = 7.5 Hz, 2H), 7.31 (dd, *J* = 12.0, 8.4 Hz, 2H), 6.60 (s, 2H), 6.06 (s, 2H), 4.57 (s, 2H), 3.76 (s, 3H). <sup>13</sup>C NMR (101 MHz,

DMSO-*d*<sub>6</sub>) δ 166.53, 150.66, 142.18, 138.31, 133.88, 131.94 (2C), 129.00 (2C), 128.14, 127.21, 126.85 (2C), 123.50, 122.07, 119.97, 118.15, 117.38, 113.06 (2C), 74.37, 51.98. ESI-MS *m/z*: 389.10 (MH<sup>+</sup>).

**2.4 Preparation of 4-((6-((aminoxy)methyl)-2-phenylimidazo[1,2-a]pyridin-3-yl)amino)benzoic acid (5).** Treatment of methyl 4-((6-((aminoxy)methyl)-2-phenylimidazo[1,2-a]pyridin-3-yl)amino)benzoate (**15**) as outlined in general procedure D (*μ*w, 100°C, 4 h) and purification by preparative HPLC (linear gradient of 5% B to 25% B over 20 min with a flow rate 20 mL/min, retention time = 16.1 min.) provided 4-((6-((aminoxy)methyl)-2-phenylimidazo[1,2-a]pyridin-3-yl)amino)benzoic acid (**5**) as a white solid (66 % yield). <sup>1</sup>H NMR (500 MHz, DMSO-*d*<sub>6</sub>) δ 8.93 (s, 1H), 8.17 (s, 1H), 7.89 (dd, *J* = 8.4, 1.3 Hz, 2H), 7.77 (d, *J* = 9.3 Hz, 1H), 7.69 (d, *J* = 9.1 Hz, 2H), 7.52 – 7.48 (m, 1H), 7.38 (t, *J* = 7.7 Hz, 2H), 7.32 – 7.28 (m, 1H), 6.58 (d, *J* = 8.1 Hz, 2H), 4.94 (s, 2H). <sup>13</sup>C NMR (126 MHz, DMSO-*d*<sub>6</sub>) δ 167.59, 149.82, 141.08, 136.12, 132.03 (2C), 131.52, 129.31 (2C), 129.10, 127.08 (2C), 124.55, 121.60, 119.21, 118.04, 116.60, 115.69, 113.18 (2C), 73.44. ESI-MS: *m/z*: 375.10 (MH<sup>+</sup>). HRMS calcd. for C<sub>21</sub>H<sub>19</sub>N<sub>4</sub>O<sub>3</sub>(MH<sup>+</sup>): 375.1452; found: 375.1437.

### 3. Preparation of aminoxy-labelled imidazopyridine (6)

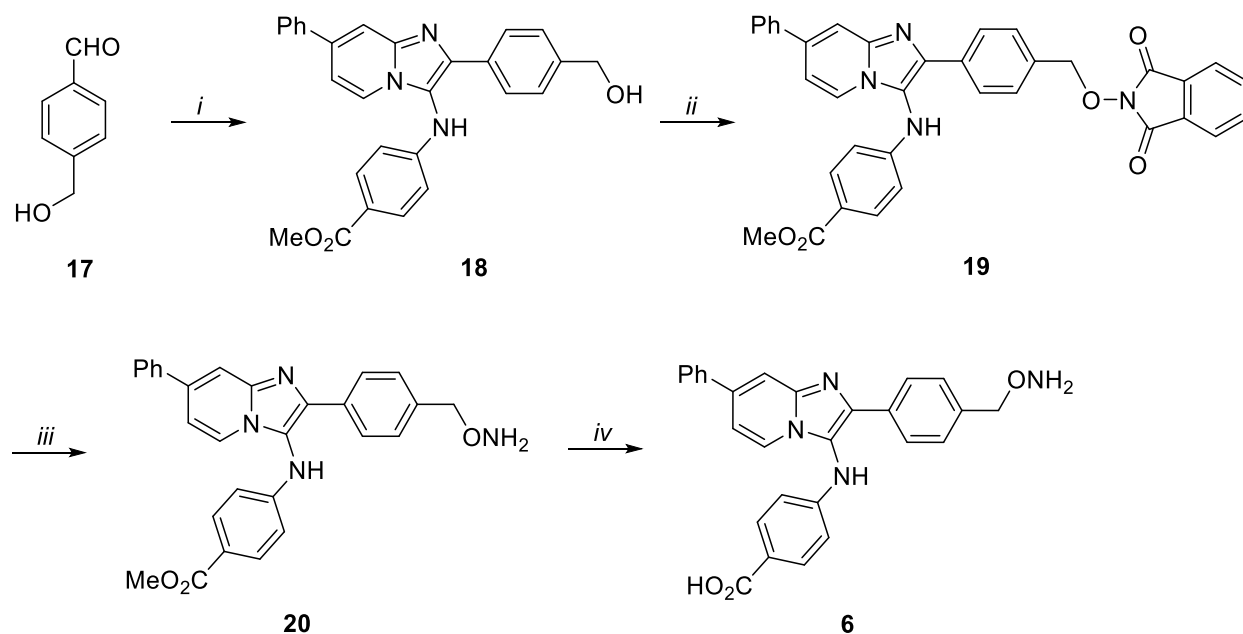

**Scheme S2.** Synthesis of aminoxy-labelled imidazopyridine **6**. *Reagents and conditions:* (i) 4-phenylpyridin-2-amine (**16a**), CNPhCO<sub>2</sub>Me (**13**), HOAc, MeOH, rt; (ii) *N*-hydroxyphthalimide, Ph<sub>3</sub>P, DIAD, THF; (iii) NH<sub>2</sub>NH<sub>2</sub>-H<sub>2</sub>O, DCM; (iv) NaOH (aq. 2N), MeOH, 80 °C (μw), 3 h

**3.1 Preparation of methyl 4-((2-(4-(hydroxymethyl)phenyl)-7-phenylimidazo[1,2-a]pyridin-3-yl)amino)benzoate (**18**).** Treatment of commercially available 4-phenylpyridin-2-amine (**16a**), 4-(hydroxymethyl)benzaldehyde (**17**) and methyl 4-isocyanobenzoate (**13**) as outlined in general procedure B (rt, 18 h) provided methyl 4-((2-(4-(hydroxymethyl)phenyl)-7-phenylimidazo[1,2-a]pyridin-3-yl)amino)benzoate (**18**) as a white solid (63 % yield). <sup>1</sup>H NMR (500 MHz, DMSO-*d*<sub>6</sub>) δ 8.94 (s, 1H), 8.03 (dd, *J* = 7.2, 0.9 Hz, 1H), 7.99 (d, *J* = 8.3 Hz, 2H), 7.97 (d, *J* = 0.9 Hz, 1H), 7.85 (d, *J* = 7.1 Hz, 2H), 7.79 (d, *J* = 9.1 Hz, 2H), 7.53 (dd, *J* = 8.4, 7.0 Hz, 2H), 7.44 (t, *J* = 7.3 Hz, 1H), 7.34 (t, *J* = 8.6 Hz, 3H), 6.62 (brs, 2H), 5.18 (t, *J* = 5.7 Hz, 1H), 4.50 (d, *J* = 5.6 Hz, 2H), 3.76 (s, 3H). <sup>13</sup>C NMR (126 MHz, DMSO-*d*<sub>6</sub>) δ 166.52, 150.63, 142.87, 142.63, 138.94, 138.31, 137.32, 132.25, 131.94 (2C), 129.61 (2C), 128.80, 127.09 (4C),



126.65 (2C), 123.57, 119.95, 117.75, 113.96, 113.09 (2C), 112.26, 63.14, 51.99. ESI-MS *m/z*: 450.2 (MH<sup>+</sup>).

**3.2 Preparation of methyl 4-((2-(4-(((1,3-dioxoisindolin-2-yl)oxy)methyl)phenyl)-7-phenylimidazo[1,2-a]pyridin-3-yl)amino)benzoate (19).** Treatment of methyl 4-((2-(4-(hydroxymethyl)phenyl)-7-phenylimidazo[1,2-a]pyridin-3-yl)amino)benzoate (**18**) as outlined in general procedure A provided title compound (**19**) as a yellow solid (79 % yield). <sup>1</sup>H NMR (500 MHz, DMSO-*d*<sub>6</sub>) δ 8.98 (s, 1H), 8.07 (d, *J* = 8.0 Hz, 2H), 8.04 (d, *J* = 7.1 Hz, 1H), 7.99 (s, 1H), 7.86 (s, 5H), 7.85 (s, 1H), 7.79 (d, *J* = 8.5 Hz, 2H), 7.56 (d, *J* = 8.2 Hz, 2H), 7.53 (t, *J* = 7.6 Hz, 2H), 7.44 (t, *J* = 7.4 Hz, 1H), 7.35 (dd, *J* = 7.1, 1.8 Hz, 1H), 6.63 (s, 2H), 5.17 (s, 2H), 3.77 (s, 3H). <sup>13</sup>C NMR (126 MHz, DMSO-*d*<sub>6</sub>) δ 166.51, 163.58 (2C), 150.45, 142.98, 138.28, 138.24, 137.55, 135.27 (2C), 134.52, 134.06, 131.96 (2C), 130.41 (2C), 129.62 (2C), 129.00 (2C), 128.85, 127.11 (2C), 126.80 (2C), 123.73 (2C), 123.68, 120.07, 118.33, 114.07, 113.15 (2C), 112.44, 79.45, 52.00. ESI-MS *m/z*: 595.2 (MH<sup>+</sup>), 617.1 (MNa<sup>+</sup>).

**3.3 Preparation of methyl 4-((2-(4-((aminooxy)methyl)phenyl)-7-phenylimidazo[1,2-a]pyridin-3-yl)amino)benzoate (20).** Treatment of methyl 4-((2-(4-(((1,3-dioxoisindolin-2-yl)oxy)methyl)phenyl)-7-phenylimidazo[1,2-a]pyridin-3-yl)amino)benzoate (**19**) as outlined in general procedure C provided methyl 4-((2-(4-((aminooxy)methyl)phenyl)-7-phenylimidazo[1,2-a]pyridin-3-yl)amino)benzoate (**20**) as a yellow solid (99 % yield). <sup>1</sup>H NMR (500 MHz, DMSO-*d*<sub>6</sub>) δ 9.01 (s, 1H), 8.07 (d, *J* = 8.1 Hz, 3H), 8.03 (s, 1H), 7.89 (d, *J* = 7.1 Hz, 2H), 7.84 (d, *J* = 8.9 Hz, 2H), 7.56 (t, *J* = 7.7 Hz, 2H), 7.47 (t, *J* = 7.4 Hz, 1H), 7.40 (d, *J* = 8.2 Hz, 2H), 7.37 (dd, *J* = 7.1, 1.8 Hz, 1H), 6.68 (brs, 2H), 6.11 (brs, 2H), 4.62 (s, 2H), 3.81 (s, 3H). <sup>13</sup>C NMR (126 MHz, DMSO-*d*<sub>6</sub>) δ 166.53, 150.61, 142.93, 138.79, 138.41, 138.29, 137.40, 133.01, 131.96 (2C),

129.60 (2C), 128.80, 128.63 (2C), 127.09 (2C), 126.71 (2C), 123.59, 120.01, 117.91, 114.02, 113.11 (2C), 112.31, 77.06, 51.99. DUIS-MS: m/z: 465.2 (MH<sup>+</sup>).

**3.4 Preparation of 4-((2-(4-((aminoxy)methyl)phenyl)-7-phenylimidazo[1,2-a]pyridin-3-yl)amino)benzoic acid (6).** Treatment of methyl 4-((2-(4-((aminoxy)methyl)phenyl)-7-phenylimidazo[1,2-a]pyridin-3-yl)amino)benzoate (**20**) as outlined in general procedure D and purification by preparative HPLC (linear gradient of 10% B to 30% B over 20 min with a flow rate 20 mL/min; retention time = 18.0 min) provided 4-((2-(4-((aminoxy)methyl)phenyl)-7-phenylimidazo[1,2-a]pyridin-3-yl)amino)benzoic acid (**6**) as a light yellow solid (83 % yield). <sup>1</sup>H NMR (500 MHz, DMSO-*d*<sub>6</sub>) δ 8.94 (s, 1H), 8.12 (d, *J* = 7.1 Hz, 1H), 7.99 (d, *J* = 6.5 Hz, 2H), 7.98 (s, 1H), 7.80 (d, *J* = 7.2 Hz, 2H), 7.70 (d, *J* = 9.1 Hz, 2H), 7.49 (t, *J* = 7.6 Hz, 2H), 7.45 – 7.39 (m, 4H), 6.60 (d, *J* = 7.5 Hz, 2H), 4.89 (s, 2H). <sup>13</sup>C NMR (126 MHz, DMSO-*d*<sub>6</sub>) δ 167.58, 149.73, 141.85, 137.65, 134.43, 132.03 (2C), 130.01 (2C), 129.75 (2C), 129.41, 127.34 (2C), 127.19 (2C), 124.37, 121.60, 120.41, 118.98, 118.06, 115.70, 113.74, 113.23 (2C), 112.59, 76.04. ESI-MS m/z: 451.10 (MH<sup>+</sup>). HRMS cacl. for C<sub>27</sub>H<sub>23</sub>N<sub>4</sub>O<sub>3</sub> (MH<sup>+</sup>), 451.1765; found: 451.1753.

#### 4. Preparation of oximes (5-Y and 6-Y)

**4.1 Preparation of (Z)-4-((6-(((4-(5-cyanopyridin-2-yl)benzylidene)amino)oxy)methyl)-2-phenylimidazo[1,2-a]pyridin-3-yl)amino)benzoic acid [(Z)-5-D1] and (E)-4-((6-(((4-(5-cyanopyridin-2-yl)benzylidene)amino)oxy)methyl)-2-phenylimidazo[1,2-a]pyridin-3-yl)amino)benzoic acid [(E)-5-D1].** Treatment of 4-((6-((aminoxy)methyl)-2-phenylimidazo[1,2-a]pyridin-3-yl)amino)benzoic acid (**5**) and commercially available 6-(4-formylphenyl)nicotinonitrile as outlined in general procedure E

afforded 4-((6-(((4-(5-cyanopyridin-2-yl)benzylidene)amino)oxy)methyl)-2-phenylimidazo[1,2-a]pyridin-3-yl)amino)benzoic acid (**5-D1**, white solid, 33 % yield) as a mixture of (*Z*) and (*E*) isomers with a ratio 5:95 based on LC. Purification by preparative HPLC (linear gradient of 30% B to 40% B over 20 min with a flow rate 20 mL/min) provided the title isomers separately.

(*Z*)-isomer ((*Z*)-**5-D1**) at retention time = 12.7 min as a white solid. ESI-MS *m/z*: 565.2 (MH<sup>+</sup>). HRMS cacl. for C<sub>34</sub>H<sub>25</sub>N<sub>6</sub>O<sub>3</sub> (MH<sup>+</sup>): 565.1983; found: 565.1966.

(*E*)-isomer ((*E*)-**5-D1**) at retention time = 15.5 min as a white solid. <sup>1</sup>H NMR (500 MHz, DMSO-*d*<sub>6</sub>) δ 12.25 (s, 1H), 9.04 (d, *J* = 2.1 Hz, 1H), 8.81 (s, 1H), 8.34 (dd, *J* = 8.4, 2.2 Hz, 1H), 8.29 (s, 1H), 8.15 (d, *J* = 8.4 Hz, 1H), 8.13 (d, *J* = 8.4 Hz, 2H), 8.09 (s, 1H), 7.93 (d, *J* = 7.0 Hz, 2H), 7.69 (d, *J* = 8.9 Hz, 2H), 7.63 (d, *J* = 8.4 Hz, 3H), 7.39 (dd, *J* = 9.3, 1.6 Hz, 1H), 7.33 (t, *J* = 7.7 Hz, 2H), 7.23 (t, *J* = 7.4 Hz, 1H), 6.52 (s, 2H), 5.16 (s, 2H). <sup>13</sup>C NMR (126 MHz, DMSO-*d*<sub>6</sub>) δ 165.52, 156.54, 150.94, 148.14, 147.35, 139.82, 139.40, 136.46, 136.09, 131.95, 131.44, 129.95 (2C), 126.92 (2C), 126.17, 125.96 (2C), 125.78 (2C), 125.41, 124.75 (2C), 120.88 (2C), 119.06, 118.70, 116.42, 115.60, 115.32, 110.77 (2C), 105.99, 71.16. ESI-MS *m/z*: 565.2 (MH<sup>+</sup>). HRMS cacl. for C<sub>34</sub>H<sub>25</sub>N<sub>6</sub>O<sub>3</sub> (MH<sup>+</sup>): 565.1983; found: 565.1980.

**4.2 Preparation of (*Z*)-4-((6-(((4-((6-methylpyrazin-2-yl)oxy)benzylidene)amino)oxy)methyl)-2-phenylimidazo[1,2-a]pyridin-3-yl)amino)benzoic acid [(*Z*)-5-P3] and (*E*)-4-((6-(((4-((6-methylpyrazin-2-yl)oxy)benzylidene)amino)oxy)methyl)-2-phenylimidazo[1,2-a]pyridin-3-yl)amino)benzoic acid [(*E*)-5-P3].** Treatment of 4-((6-((aminooxy)methyl)-2-phenylimidazo[1,2-a]pyridin-3-yl)amino)benzoic acid (**5**) and commercially available 4-((6-methylpyrazin-2-yl)oxy)benzaldehyde as outlined in general procedure E afforded 4-((6-(((4-((6-methylpyrazin-

2-yl)oxy)benzylidene)amino)oxy)methyl)-2-phenylimidazo[1,2-a]pyridin-3-yl)amino)benzoic acid (**5-P3**, white solid, 40 % yield) as a mixture of (*Z*)- and (*E*)-isomers with a ratio 5:95 based on LC. Purification by preparative HPLC (linear gradient of 30% B to 40% B over 20 min with a flow rate 20 mL/min) provided the title isomers separately.

(*Z*)-isomer ((*Z*)-**5-P3**) at retention time = 10.6 min as a white solid. ESI-MS *m/z*: 571.2 (MH<sup>+</sup>). HRMS caclcd. for C<sub>33</sub>H<sub>27</sub>N<sub>6</sub>O<sub>4</sub> (MH<sup>+</sup>): 571.2088; found: 571.2090.

(*E*)-isomer ((*E*)-**5-P3**) at retention time = 11.7 min as a white solid. <sup>1</sup>H NMR (500 MHz, DMSO-*d*<sub>6</sub>) δ 8.96 (s, 1H), 8.28 (s, 1H), 8.25 (d, *J* = 10.2 Hz, 3H), 7.86 (d, *J* = 7.2 Hz, 2H), 7.80 (d, *J* = 9.2 Hz, 1H), 7.69 (d, *J* = 8.8 Hz, 3H), 7.53 (d, *J* = 8.7 Hz, 2H), 7.41 (t, *J* = 7.7 Hz, 2H), 7.33 (t, *J* = 7.3 Hz, 1H), 7.15 (d, *J* = 8.7 Hz, 2H), 6.63 (d, *J* = 7.9 Hz, 2H), 5.19 (s, 2H), 2.27 (s, 3H). <sup>13</sup>C NMR (126 MHz, DMSO-*d*<sub>6</sub>) δ 167.57, 158.75, 155.13, 151.54, 149.67, 149.58, 140.10, 139.24, 132.69, 131.99 (2C), 129.43(3C), 128.96 (2C), 128.77, 127.13 (2C), 125.64, 123.59, 121.75 (3C), 119.32, 118.03, 115.68, 115.50 (2C), 113.29 (2C), 72.55, 21.05. ESI-MS *m/z*: 571.2 (MH<sup>+</sup>). HRMS caclcd. for C<sub>33</sub>H<sub>27</sub>N<sub>6</sub>O<sub>4</sub> (MH<sup>+</sup>): 571.2088; found: 571.2089.

**4.3 Preparation of (*Z*)-4-((2-(4-(((4-(5-cyanopyridin-2-yl)benzylidene)amino)oxy)methyl)phenyl)-7-phenylimidazo[1,2-a]pyridin-3-yl)amino)benzoic acid [(*Z*)-6-D1] and (*E*)-4-((2-(4-(((4-(5-Cyanopyridin-2-yl)benzylidene)amino)oxy)methyl)phenyl)-7-phenylimidazo[1,2-a]pyridin-3-yl)amino)benzoic acid [(*E*)-6-D1].** Treatment of 4-((2-(4-((aminoxy)methyl)phenyl)-7-phenylimidazo[1,2-a]pyridin-3-yl)amino)benzoic acid (**6**) and commercially available 6-(4-formylphenyl)nicotinonitrile as outlined in general procedure E afforded 4-((2-(4-(((4-(5-cyanopyridin-2-yl)benzylidene)amino)oxy)methyl)phenyl)-7-phenylimidazo[1,2-a]pyridin-3-

yl)amino)benzoic acid (**6-D1**, white solid, 58 % yield) as a mixture of (*Z*) and (*E*) isomers with a ratio 4:96 based on LC. Purification by preparative HPLC (linear gradient of 30% B to 50% B over 20 min with a flow rate 20 mL/min) provided the title isomers separately.

(*Z*)-isomer ((*Z*)-**6-D1**) at retention time = 17.7 min as a white solid. <sup>1</sup>H NMR (500 MHz, DMSO-*d*<sub>6</sub>) δ 9.13 (dd, *J* = 2.2, 0.9 Hz, 1H), 9.00 (brs, 1H), 8.44 (dd, *J* = 8.3, 2.2 Hz, 1H), 8.30 – 8.24 (m, 3H), 8.10 (d, *J* = 8.6 Hz, 2H), 8.04 (s, 2H), 8.02 (d, *J* = 8.0 Hz, 3H), 7.88 (d, *J* = 7.4 Hz, 2H), 7.78 (d, *J* = 9.1 Hz, 2H), 7.66 (s, 1H), 7.52 (ddt, *J* = 21.6, 14.6, 7.4 Hz, 6H), 6.68 (brs, 2H), 5.29 (s, 2H). ESI-MS *m/z*: 641.2 (MH<sup>+</sup>) HRMS calcd. for C<sub>40</sub>H<sub>29</sub>N<sub>6</sub>O<sub>3</sub> (MH<sup>+</sup>): 641.2296; found: 641.2287.

(*E*)-isomer ((*E*)-**6-D1**) at retention time = 19.2 min as a white solid. <sup>1</sup>H NMR (500 MHz, DMSO-*d*<sub>6</sub>) δ 12.37 (brs, 1H), 9.12 (dd, *J* = 2.2, 0.9 Hz, 1H), 9.00 (s, 1H), 8.42 (d, *J* = 8.2 Hz, 1H), 8.41 (s, 1H), 8.25 (dd, *J* = 8.4, 0.9 Hz, 1H), 8.24 (d, *J* = 8.5 Hz, 2H), 8.18 (brs, 1H), 8.04 (s, 1H), 8.01 (d, *J* = 8.2 Hz, 2H), 7.88 (d, *J* = 7.1 Hz, 2H), 7.77 (d, *J* = 8.4 Hz, 4H), 7.59 – 7.46 (m, 6H), 6.69 (s, 2H), 5.24 (s, 2H). <sup>13</sup>C NMR (126 MHz, DMSO-*d*<sub>6</sub>) δ 167.82, 158.70, 153.06, 149.24, 142.85, 141.54, 138.50, 138.30, 137.39, 134.28, 133.56, 131.94, 129.60 (3C), 129.01 (2C), 128.79, 128.13 (3C), 127.94 (3C), 127.09 (3C), 126.86 (2C), 123.65, 120.85 (2C), 118.49, 117.72, 114.01, 112.79 (2C), 112.28, 108.12, 75.91. ESI-MS *m/z*: 641.2 (MH<sup>+</sup>). HRMS calcd. for C<sub>40</sub>H<sub>29</sub>N<sub>6</sub>O<sub>3</sub> (MH<sup>+</sup>): 641.2296; found: 641.2289.

**4.4 Preparation of (*Z*)-4-((7-phenyl-2-(4-(((4-(pyrazin-2-yl)benzylidene)amino)oxy)methyl)phenyl)imidazo[1,2-*a*]pyridin-3-yl)amino)benzoic acid [(*Z*)-**6-E6**] and (*E*)-4-((7-phenyl-2-(4-(((4-(pyrazin-2-yl)benzylidene)amino)oxy)methyl)phenyl)imidazo[1,2-*a*]pyridin-3-yl)amino)benzoic acid**

**[(E)-6-E6]**. Treatment of 4-((2-(4-((aminooxy)methyl)phenyl)-7-phenylimidazo[1,2-a]pyridin-3-yl)amino)benzoic acid (**6**) and commercially available 4-(pyrazin-2-yl)benzaldehyde as outlined in general procedure E afforded 4-((7-phenyl-2-(4-(((4-(pyrazin-2-yl)benzylidene)amino)oxy)methyl)phenyl)imidazo[1,2-a]pyridin-3-yl)amino)benzoic acid (**6-E6**, white solid, 34 % yield) as a mixture of (*Z*) and (*E*) isomers with a ratio 4:96 based on LC. Purification by preparative HPLC (linear gradient of 30% B to 45% B over 20 min with a flow rate 20 mL/min) provided the title isomers separately.

(*Z*)-isomer (**(Z)-6-E6**) at retention time = 14.3 min as a white solid. <sup>1</sup>H NMR (500 MHz, DMSO-*d*<sub>6</sub>) δ 12.34 (brs, 1H), 9.32 (d, *J* = 1.5 Hz, 1H), 8.93 (s, 1H), 8.76 (dd, *J* = 2.5, 1.5 Hz, 1H), 8.66 (d, *J* = 2.5 Hz, 1H), 8.25 (d, *J* = 8.5 Hz, 2H), 8.11 (d, *J* = 8.6 Hz, 2H), 8.05 (d, *J* = 8.3 Hz, 3H), 8.00 (s, 1H), 7.86 (d, *J* = 7.1 Hz, 2H), 7.77 (d, *J* = 9.0 Hz, 2H), 7.65 (s, 1H), 7.54 (t, *J* = 7.7 Hz, 2H), 7.49 (d, *J* = 8.0 Hz, 2H), 7.45 (t, *J* = 7.3 Hz, 1H), 7.39 (d, *J* = 7.2 Hz, 1H), 6.63 (brs, 1H), 6.55 (brs, 1H), 5.27 (s, 2H). ESI-MS *m/z*: 617.2 (MH<sup>+</sup>). HRMS cacl. for C<sub>38</sub>H<sub>29</sub>N<sub>6</sub>O<sub>3</sub> (MH<sup>+</sup>): 617.2296; found: 617.2295.

(*E*)-isomer (**(E)-6-E6**) at retention time = 15.4 min. as a white solid. <sup>1</sup>H NMR (500 MHz, DMSO-*d*<sub>6</sub>) δ 12.38 (brs, 1H), 9.30 (d, *J* = 1.6 Hz, 1H), 9.02 (s, 1H), 8.74 (dd, *J* = 2.5, 1.5 Hz, 1H), 8.65 (d, *J* = 2.5 Hz, 1H), 8.41 (s, 1H), 8.21 (d, *J* = 8.4 Hz, 3H), 8.05 (d, *J* = 1.8 Hz, 1H), 8.01 (d, *J* = 8.2 Hz, 2H), 7.89 (d, *J* = 7.5 Hz, 2H), 7.78 (dd, *J* = 8.8, 2.5 Hz, 4H), 7.60 – 7.46 (m, 6H), 6.70 (brs, 2H), 5.24 (s, 2H). ESI-MS *m/z*: 617.2 (MH<sup>+</sup>). HRMS cacl. for C<sub>38</sub>H<sub>29</sub>N<sub>6</sub>O<sub>3</sub> (MH<sup>+</sup>): 617.2296; found: 617.2301.

**4.5 Preparation of (Z)-4-((2-(4-(((4-(2-oxopyrrolidin-1-yl)benzylidene)amino)oxy)methyl)phenyl)-7-phenylimidazo[1,2-a]pyridin-3-yl)amino)benzoic acid [(Z)-6-B7] and**

**(E)-4-((2-(4-(((4-(2-oxopyrrolidin-1-yl)benzylidene)amino)oxy)methyl)phenyl)-7-phenylimidazo[1,2-a]pyridin-3-yl)amino)benzoic acid [(E)-6-B7].** Treatment of 4-((2-(4-((amino)oxy)methyl)phenyl)-7-phenylimidazo[1,2-a]pyridin-3-yl)amino)benzoic acid (**6**) and commercially available 4-(2-oxopyrrolidin-1-yl)benzaldehyde as outlined in general procedure E afforded 4-((2-(4-(((4-(2-oxopyrrolidin-1-yl)benzylidene)amino)oxy)methyl)phenyl)-7-phenylimidazo[1,2-a]pyridin-3-yl)amino)benzoic acid (**6-B7**, white solid, 28 % yield) as a mixture of (Z) and (E) isomers with a ratio 5:95 based on LC. Purification by preparative HPLC (linear gradient of 30% B to 40% B over 20 min with a flow rate 20 mL/min) provided the title isomers separately.

(Z)-isomer ((Z)-**6-B7**) at retention time = 14.2 min as a white solid. <sup>1</sup>H NMR (500 MHz, DMSO-*d*<sub>6</sub>) δ 12.36 (brs, 1H), 8.97 (s, 1H), 8.13 (s, 1H), 8.02 (d, *J* = 8.3 Hz, 3H), 7.96 (d, *J* = 8.9 Hz, 2H), 7.87 (d, *J* = 7.7 Hz, 2H), 7.77 (dd, *J* = 8.8, 6.4 Hz, 3H), 7.72 (d, *J* = 8.8 Hz, 1H), 7.60 (d, *J* = 8.9 Hz, 1H), 7.55 (t, *J* = 7.6 Hz, 2H), 7.50 – 7.44 (m, 5H), 6.66 (s, 2H), 5.22 (brs, 2H), 3.87 – 3.84 (m, 2H), 2.56 – 2.52 (m, 2H), 2.12 – 2.01 (m, 2H). ESI-MS *m/z*: 622.2 (MH<sup>+</sup>). HRMS calcd. for C<sub>38</sub>H<sub>32</sub>N<sub>5</sub>O<sub>4</sub> (MH<sup>+</sup>): 622.2449; found: 622.2444.

(E)-isomer ((E)-**6-B7**) at retention time = 15.3 min as a white solid. <sup>1</sup>H NMR (500 MHz, DMSO-*d*<sub>6</sub>) δ 9.05 (s, 1H), 8.28 (s, 1H), 8.25 (d, *J* = 7.1 Hz, 1H), 8.08 (s, 1H), 7.98 (d, *J* = 8.3 Hz, 2H), 7.90 (d, *J* = 7.2 Hz, 2H), 7.78 (d, *J* = 9.1 Hz, 2H), 7.72 (d, *J* = 8.8 Hz, 2H), 7.58 (dd, *J* = 14.1, 8.4 Hz, 5H), 7.52 (dd, *J* = 13.9, 7.9 Hz, 3H), 6.72 (d, *J* = 7.9 Hz, 2H), 5.19 (s, 2H), 3.84 (t, *J* =

7.0 Hz, 2H), 2.52 - 2.50 (m, 2H), 2.11 - 2.02 (m, 2H). ESI-MS  $m/z$ : 622.2 ( $MH^+$ ). HRMS calcd. for  $C_{38}H_{32}N_5O_4$  ( $MH^+$ ): 622.2449; found: 622.2443.

**4.6 Preparation of (Z)-4-((2-(4-(((4-((6-methylpyrazin-2-yl)oxy)benzylidene)amino)oxy)methyl)phenyl)-7-phenylimidazo[1,2-a]pyridin-3-yl)amino)benzoic acid [(Z)-6-P3] and (E)-4-((2-(4-(((4-((6-methylpyrazin-2-yl)oxy)benzylidene)amino)oxy)methyl)phenyl)-7-phenylimidazo[1,2-a]pyridin-3-yl)amino)benzoic acid [(E)-6-P3].** Treatment of 4-((2-(4-((aminoxy)methyl)phenyl)-7-phenylimidazo[1,2-a]pyridin-3-yl)amino)benzoic acid (**6**) and commercially available 4-((6-methylpyrazin-2-yl)oxy)benzaldehyde as outlined in general procedure E afforded 4-((2-(4-(((4-((6-methylpyrazin-2-yl)oxy)benzylidene)amino)oxy)methyl)phenyl)-7-phenylimidazo[1,2-a]pyridin-3-yl)amino)benzoic acid (**6-P3**, white solid, 34 % yield) as a mixture of (*Z*) and (*E*) isomers with a ratio 5:95 based on LC. Purification by preparative HPLC (linear gradient of 30% B to 50% B over 20 min with a flow rate 20 mL/min) provided the title isomers separately.

(*Z*)-isomer ((*Z*)-**6-P3**) at retention time = 15.5 min as a white solid. ESI-MS  $m/z$ : 647.2 ( $MH^+$ ). HRMS calcd. for  $C_{39}H_{31}N_6O_4$  ( $MH^+$ ): 647.2401; found: 647.2396.

(*E*)-isomer ((*E*)-**6-P3**) at retention time = 16.3 min as a white solid.  $^1H$  NMR (500 MHz, DMSO- $d_6$ )  $\delta$  8.99 (s, 1H), 8.28 (s, 1H), 8.27 - 8.22 (m, 2H), 8.19 (d,  $J = 7.1$  Hz, 1H), 8.01 (s, 1H), 7.91 (d,  $J = 8.3$  Hz, 2H), 7.83 (d,  $J = 7.1$  Hz, 2H), 7.71 (d,  $J = 9.0$  Hz, 2H), 7.59 (d,  $J = 8.7$  Hz, 2H), 7.54 - 7.42 (m, 6H), 7.16 (d,  $J = 8.7$  Hz, 2H), 6.66 (d,  $J = 8.3$  Hz, 2H), 5.13 (s, 2H), 2.27 (s, 3H).  $^{13}C$  NMR (126 MHz, DMSO- $d_6$ )  $\delta$  167.57, 158.78, 155.05, 151.57, 149.53, 149.22, 141.55, 140.96, 139.23 (2C), 137.26, 134.35, 132.69(2C), 132.02(2C), 129.81(2C), 129.75, 129.16(2C), 129.00, 128.95(2C), 127.49(2C), 127.16(2C), 124.78, 121.83, 121.77(2C), 119.08, 114.59,



113.39, 113.35, 111.49, 75.39, 21.05. ESI-MS  $m/z$ : 647.2 ( $MH^+$ ). HRMS cacl. for  $C_{39}H_{31}N_6O_4$  ( $MH^+$ ): 647.2401; found: 647.2396.

**4.7 Preparation of (Z)-4-((2-(4-(((1,1'-biphenyl)-4-ylmethylene)amino)oxy)methyl)phenyl)-7-phenylimidazo[1,2-a]pyridin-3-yl)amino)benzoic acid [(Z)-6-M10] and (E)-4-((2-(4-(((1,1'-biphenyl)-4-ylmethylene)amino)oxy)methyl)phenyl)-7-phenylimidazo[1,2-a]pyridin-3-yl)amino)benzoic acid [(E)-6-M10].** Treatment of 4-((2-(4-((aminooxy)methyl)phenyl)-7-phenylimidazo[1,2-a]pyridin-3-yl)amino)benzoic acid (**6**) and commercially available [1,1'-biphenyl]-4-carbaldehyde as outlined in general procedure E afforded 4-((2-(4-(((1,1'-biphenyl)-4-ylmethylene)amino)oxy)methyl)phenyl)-7-phenylimidazo[1,2-a]pyridin-3-yl)amino)benzoic acid (**6-M10**, white solid, 20 % yield) as a mixture of (*Z*) and (*E*) isomers with a ratio 4:96 based on LC. Purification by preparative HPLC (linear gradient of 40% B to 60% B over 20 min with a flow rate 20 mL/min) provided the title isomers separately.

(*Z*)-isomer ((*Z*)-**6-M10**) at retention time = 12.7 min as a white solid. ESI-MS  $m/z$ : 615.2 ( $MH^+$ ). HRMS cacl. for  $C_{40}H_{31}N_4O_3$  ( $MH^+$ ): 615.2391; found: 615.2390.

(*E*)-isomer ((*E*)-**6-M10**) at retention time = 13.7 min as a white solid.  $^1H$  NMR (500 MHz,  $DMSO-d_6$ )  $\delta$  8.95 (s, 1H), 8.30 (s, 1H), 8.13 (d,  $J = 7.1$  Hz, 1H), 7.98 (s, 1H), 7.93 (d,  $J = 8.3$  Hz, 2H), 7.81 (d,  $J = 7.1$  Hz, 2H), 7.70 (d,  $J = 9.0$  Hz, 2H), 7.68 – 7.60 (m, 6H), 7.52 – 7.44 (m, 5H), 7.44 – 7.39 (m, 3H), 7.32 (t,  $J = 7.4$  Hz, 1H), 6.62 (d,  $J = 7.3$  Hz, 2H), 5.14 (s, 2H).  $^{13}C$  NMR (126 MHz,  $DMSO-d_6$ )  $\delta$  167.58, 149.72, 149.56, 142.02, 141.51, 139.74, 138.68, 137.55, 132.04 (2C), 131.35, 129.75(2C), 129.49 (4C), 129.15(2C), 128.38, 127.98(2C), 127.53(2C),

127.38(2C), 127.14(4C), 127.08, 124.46, 121.64, 118.85, 113.95, 113.27 (2C), 112.22, 75.53.

ESI-MS  $m/z$ : 615.2 ( $MH^+$ ). HRMS calcd. for  $C_{40}H_{31}N_4O_3$  ( $MH^+$ ): 615.2391; found: 615.2387.

### 5. Preparation of triazole-containing imidazopyridines (**7a-e**)

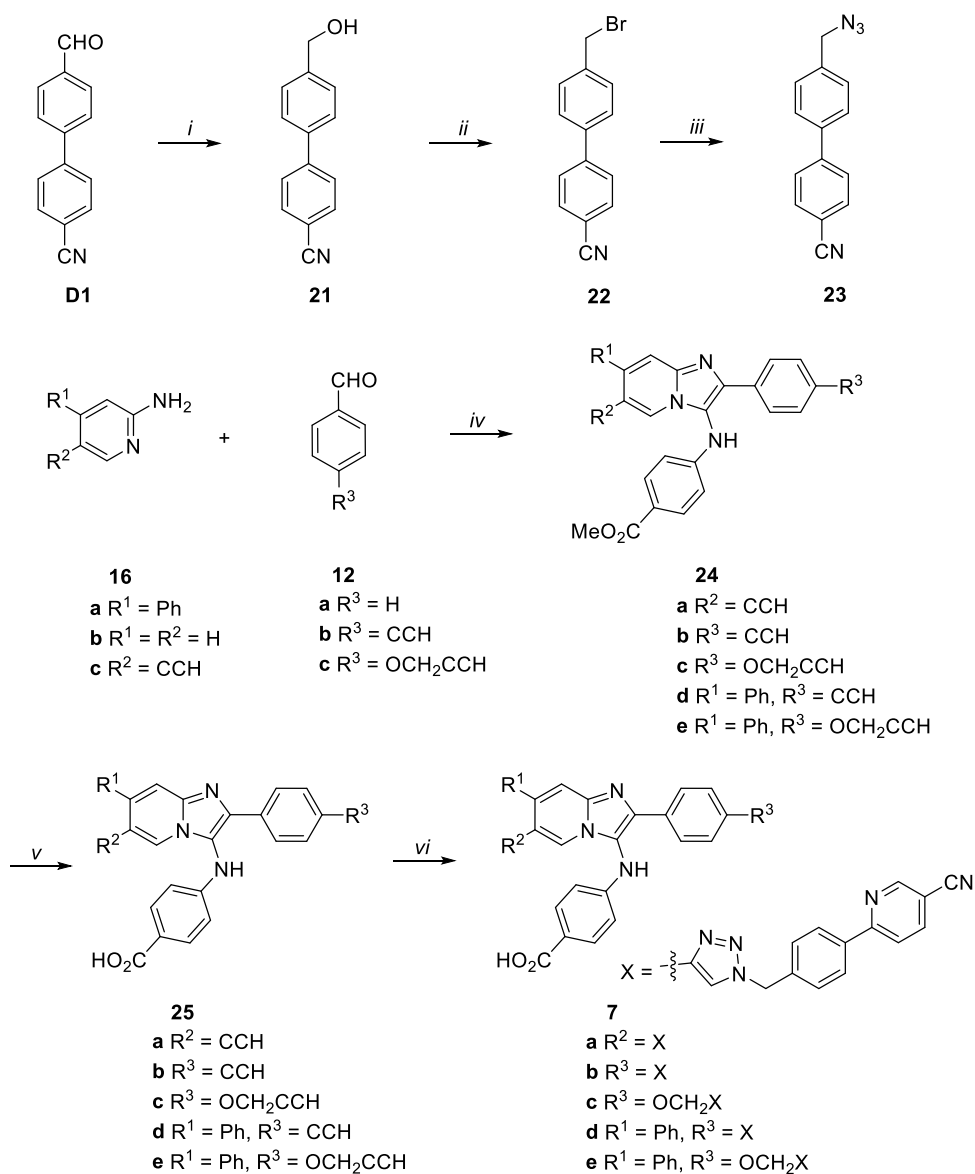

**Scheme S3.** Synthesis of triazole-containing imidazopyridines **7a-e**. *Reagents and conditions:* (i)

$NaBH_4$ , MeOH, 0 °C; (ii)  $CBr_4$ ,  $Ph_3P$ ,  $CH_3CN$ , rt; (iii)  $NaN_3$ ,  $CH_3COCH_3$ , 55 °C; (iv)

CNPhCO<sub>2</sub>Me (**13**), HOAc, MeOH; (v) NaOH, MeOH; (vi) Azide (**23**), TBTA, CuSO<sub>4</sub>·5H<sub>2</sub>O, sodium L-ascorbate, DMSO, H<sub>2</sub>O, rt.

**5.1 Preparation of 6-(4-(hydroxymethyl)phenyl)nicotinonitrile (21).** To a solution of commercially available 6-(4-formylphenyl)nicotinonitrile (**D1**, 1.02 g, 4.66 mmol) in MeOH (50 mL) and THF (50 mL). Sodium borohydride (176 mg, 4.66 mmol) was added portionwise at 0 °C. After 30 min, the reaction mixture was concentrated. The residue was purified by silica gel column chromatograph. The fraction was collected and afforded 6-(4-(hydroxymethyl)phenyl)nicotinonitrile (**21**, 898 mg) as a white solid (92 % yield). <sup>1</sup>H NMR (500 MHz, CDCl<sub>3</sub>) δ 8.97 (dd, *J* = 2.2, 0.9 Hz, 1H), 8.08 (d, *J* = 8.4 Hz, 2H), 8.04 (dd, *J* = 8.3, 2.2 Hz, 1H), 7.88 (dd, *J* = 8.3, 1.0 Hz, 1H), 7.55 (d, *J* = 8.2 Hz, 2H), 7.29 (s, 1H), 4.82 (s, 2H). <sup>13</sup>C NMR (126 MHz, CDCl<sub>3</sub>) δ 160.15, 152.45, 143.57, 139.94, 136.57, 127.61 (2C), 127.41 (2C), 119.95, 116.99, 107.87, 64.80. DUIS-MS *m/z*: 211.0 (MH<sup>+</sup>).

**5.2 Preparation of 6-(4-(bromomethyl)phenyl)nicotinonitrile (22).** To a suspension of 6-(4-(hydroxymethyl)phenyl)nicotinonitrile (**21**, 346 mg, 1.65 mmol) in acetonitrile (10 mL) was added triphenylphosphane (648 mg, 2.47 mmol). The resulting white suspension was cooled to 0° C and perbromomethane (819 mg, 2.47 mmol) was added. The formed light brown solution was stirred (rt, 30 min). The reaction mixture was concentrated and purified by silica gel column chromatograph to provide 6-(4-(bromomethyl)phenyl)nicotinonitrile (**22**, 438 mg) as a white solid (97 % yield). <sup>1</sup>H NMR (400 MHz, CDCl<sub>3</sub>) δ 8.96 (d, *J* = 1.3 Hz, 1H), 8.06 - 8.02 (m, 3H), 7.87 (dd, *J* = 8.3, 1.0 Hz, 1H), 7.56 (d, *J* = 8.4 Hz, 2H), 4.57 (s, 2H). <sup>13</sup>C NMR (101 MHz, CDCl<sub>3</sub>) δ 159.67, 152.50, 140.34, 139.98, 137.33, 129.77(2C), 127.83(2C), 119.99, 116.91, 108.13, 32.59. DUIS-MS *m/z*: 272.9, 274.9 (MH<sup>+</sup>).

**5.3 Preparation of 6-(4-(azidomethyl)phenyl)nicotinonitrile (23).** A solution of 6-(4-(bromomethyl)phenyl)nicotinonitrile (**22**, 286 mg, 1.05 mmol) and sodium azide (272 mg, 4.19 mmol) in acetone (5 mL) and water (1 mL) was heated (55 °C, 18 h). The mixture was purified by silica gel column chromatography and 6-(4-(azidomethyl)phenyl)nicotinonitrile (**23**, 217 mg) was afforded as a white solid (88 % yield). <sup>1</sup>H NMR (400 MHz, CDCl<sub>3</sub>) δ 8.97 (d, *J* = 2.1 Hz, 1H), 8.10 (d, *J* = 8.3 Hz, 2H), 8.04 (dd, *J* = 8.3, 2.2 Hz, 1H), 7.88 (d, *J* = 8.3 Hz, 1H), 7.50 (d, *J* = 8.0 Hz, 2H), 4.46 (s, 2H). <sup>13</sup>C NMR (101 MHz, CDCl<sub>3</sub>) δ 159.81, 152.50, 139.98, 138.01, 137.30, 128.79 (2C), 127.87 (2C), 120.00, 116.91, 108.11, 54.34. ESI-MS *m/z*: 236.1 (MH<sup>+</sup>).

**5.4 Preparation of methyl 4-((6-ethynyl-2-phenylimidazo[1,2-a]pyridin-3-yl)amino)benzoate (24a).** Treatment of 5-ethynylpyridin-2-amine (**16c**), benzaldehyde (**12a**) and methyl 4-isocyanobenzoate (**13**) as outlined in general procedure B (rt, 24 h) provided methyl 4-((6-ethynyl-2-phenylimidazo[1,2-a]pyridin-3-yl)amino)benzoate (**24a**) as a pale brown solid (43 % yield). <sup>1</sup>H NMR (400 MHz, CDCl<sub>3</sub>) δ 7.95 (d, *J* = 11.5 Hz, 2H), 7.91 (dd, *J* = 6.0, 2.8 Hz, 3H), 7.58 (d, *J* = 9.3 Hz, 1H), 7.39 – 7.27 (m, 4H), 6.60 (d, *J* = 8.4 Hz, 2H), 5.99 (s, 1H), 3.86 (s, 3H), 3.09 (s, 1H). <sup>13</sup>C NMR (101 MHz, CDCl<sub>3</sub>) δ 166.82, 148.61, 141.94, 140.83, 132.58, 132.10 (2C), 128.76 (2C), 128.44, 128.32, 127.05 (2C), 126.16, 122.08, 117.61, 116.94, 112.85 (2C), 108.25, 79.83, 79.13, 51.84. ESI-MS *m/z*: 368.1 (MH<sup>+</sup>).

**5.5 Preparation of methyl 4-((2-(4-ethynylphenyl)imidazo[1,2-a]pyridin-3-yl)amino)benzoate (24b).** Treatment of pyridin-2-amine (**16b**), 4-ethynylbenzaldehyde (**12b**) and methyl 4-isocyanobenzoate (**13**) as outlined in general procedure B (rt, 24 h) provided methyl 4-((2-(4-ethynylphenyl)imidazo[1,2-a]pyridin-3-yl)amino)benzoate (**24b**) as a white solid (35 % yield). <sup>1</sup>H NMR (500 MHz, CDCl<sub>3</sub>) δ 7.92 (dd, *J* = 8.5, 3.3 Hz, 4H), 7.80 (d, *J* = 6.8 Hz, 1H), 7.65 (d, *J* = 9.1 Hz, 1H), 7.47 (d, *J* = 8.0 Hz, 2H), 7.28 (d, *J* = 8.0 Hz, 1H), 6.82 (t, *J* = 6.7

Hz, 1H), 6.61 (d,  $J = 8.2$  Hz, 2H), 6.04 (s, 1H), 3.86 (s, 3H), 3.11 (s, 1H).  $^{13}\text{C}$  NMR (126 MHz,  $\text{CDCl}_3$ )  $\delta$  166.84, 148.69, 142.95, 138.64, 133.32, 132.33 (2C), 132.00 (2C), 126.62 (2C), 125.70, 122.54, 121.72, 121.51, 117.71, 117.13, 112.74 (2C), 112.70, 83.53, 78.06, 51.81. ESI-MS  $m/z$ : 368.1 ( $\text{MH}^+$ ).

**5.6 Preparation of methyl 4-((2-(4-(prop-2-yn-1-yloxy)phenyl)imidazo[1,2-a]pyridin-3-yl)amino)benzoate (24c).** Treatment of pyridin-2-amine (**16b**), 4-(prop-2-yn-1-yloxy)benzaldehyde (**12c**) and methyl 4-isocyanobenzoate (**13**) as outlined in general procedure B (rt, 24 h) provided methyl 4-((2-(4-(prop-2-yn-1-yloxy)phenyl)imidazo[1,2-a]pyridin-3-yl)amino)benzoate (**24c**) as a green solid (57 % yield).  $^1\text{H}$  NMR (500 MHz,  $\text{CDCl}_3$ )  $\delta$  7.91 (t,  $J = 8.6$  Hz, 4H), 7.78 (d,  $J = 5.7$  Hz, 1H), 7.64 (d,  $J = 9.0$  Hz, 1H), 7.28 – 7.22 (m, 1H), 6.96 (d,  $J = 8.0$  Hz, 2H), 6.80 (t,  $J = 6.7$  Hz, 1H), 6.61 (d,  $J = 8.1$  Hz, 2H), 6.15 (s, 1H), 4.70 (d,  $J = 2.3$  Hz, 2H), 3.88 (s, 3H), 2.54 (t,  $J = 2.4$  Hz, 1H).  $^{13}\text{C}$  NMR (126 MHz,  $\text{CDCl}_3$ )  $\delta$  166.88, 157.48, 148.93, 142.79, 139.34, 132.01 (2C), 128.29 (2C), 126.37, 125.41, 122.47, 121.68, 117.50, 115.95, 115.02 (2C), 112.77 (2C), 112.50, 78.40, 75.69, 55.77, 51.82. ESI-MS  $m/z$ : 398.2 ( $\text{MH}^+$ ).

**5.7 Preparation of methyl 4-((2-(4-ethynylphenyl)-7-phenylimidazo[1,2-a]pyridin-3-yl)amino)benzoate (24d).**

Treatment of 4-phenylpyridin-2-amine (**16a**), 4-ethynylbenzaldehyde (**12b**) and methyl 4-isocyanobenzoate (**13**) as outlined in general procedure B (rt, 24 h) provided methyl 4-((2-(4-ethynylphenyl)-7-phenylimidazo[1,2-a]pyridin-3-yl)amino)benzoate (**24d**) as a pale yellow solid (37 % yield).  $^1\text{H}$  NMR (500 MHz,  $\text{CDCl}_3$ )  $\delta$  7.94 (dd,  $J = 8.8, 1.6$  Hz, 4H), 7.84 (d,  $J = 0.8$  Hz, 1H), 7.81 (dd,  $J = 7.2, 0.9$  Hz, 1H), 7.66 (dd,  $J = 8.3, 1.3$  Hz, 2H), 7.51 (t,  $J = 7.6$  Hz, 2H), 7.48

(d,  $J = 8.4$  Hz, 2H), 7.46 – 7.41 (m, 1H), 7.10 (dd,  $J = 7.1, 1.8$  Hz, 1H), 6.65 (d,  $J = 8.3$  Hz, 2H), 6.18 (s, 1H), 3.88 (s, 3H), 3.13 (s, 1H).  $^{13}\text{C}$  NMR (126 MHz,  $\text{CDCl}_3$ )  $\delta$  166.81, 148.62, 143.41, 139.32, 138.85, 138.34, 133.29, 132.42 (2C), 132.07 (2C), 129.17 (2C), 128.52, 126.80 (2C), 126.67 (2C), 122.47, 121.93, 121.65, 116.93, 114.42, 112.84 (2C), 112.73, 83.56, 78.13, 51.85. ESI-MS  $m/z$ : 444.1 ( $\text{MH}^+$ ).

**5.8 Preparation of methyl 4-((7-phenyl-2-(4-(prop-2-yn-1-yloxy)phenyl)imidazo[1,2-a]pyridin-3-yl)amino)benzoate (24e).** Treatment of 4-phenylpyridin-2-amine (**16a**), 4-(prop-2-yn-1-yloxy)benzaldehyde (**12c**) and methyl 4-isocyanobenzoate (**13**) as outlined in general procedure B (rt, 24 h) provided methyl 4-((7-phenyl-2-(4-(prop-2-yn-1-yloxy)phenyl)imidazo[1,2-a]pyridin-3-yl)amino)benzoate (**24e**) as a white solid (49 % yield).  $^1\text{H}$  NMR (500 MHz,  $\text{CDCl}_3$ )  $\delta$  7.97 – 7.89 (m, 4H), 7.80 (d,  $J = 10.8$  Hz, 2H), 7.64 (d,  $J = 7.2$  Hz, 2H), 7.49 (t,  $J = 7.4$  Hz, 2H), 7.42 (t,  $J = 7.3$  Hz, 1H), 7.06 (d,  $J = 7.0$  Hz, 1H), 6.97 (d,  $J = 8.4$  Hz, 2H), 6.64 (d,  $J = 8.2$  Hz, 2H), 6.18 (s, 1H), 4.69 (d,  $J = 2.4$  Hz, 2H), 3.88 (s, 3H), 2.53 (t,  $J = 2.4$  Hz, 1H).  $^{13}\text{C}$  NMR (126 MHz,  $\text{CDCl}_3$ )  $\delta$  166.87, 157.51, 148.94, 143.21, 140.01, 138.43, 132.03 (2C), 129.15 (2C), 128.41, 128.25 (2C), 126.76 (2C), 126.43, 122.39 (2C), 121.69, 115.80, 115.03 (2C), 114.15, 112.80 (2C), 112.35, 78.39, 75.72, 55.75, 51.82. ESI-MS  $m/z$ : 474.1 ( $\text{MH}^+$ ).

**5.9 Preparation of 4-((6-ethynyl-2-phenylimidazo[1,2-a]pyridin-3-yl)amino)benzoic acid (25a).** Treatment of methyl 4-((6-ethynyl-2-phenylimidazo[1,2-a]pyridin-3-yl)amino)benzoate (**24a**) as outlined in general procedure D (rt, 24 h) provided 4-((6-ethynyl-2-phenylimidazo[1,2-a]pyridin-3-yl)amino)benzoic acid (**25a**) as a brown solid (48 % yield).  $^1\text{H}$  NMR (500 MHz,  $\text{DMSO-}d_6$ )  $\delta$  12.34 (s, 1H), 8.83 (s, 1H), 8.16 (s, 1H), 8.01 (d,  $J = 7.7$  Hz, 2H), 7.76 (d,  $J = 8.4$  Hz, 2H), 7.68 (d,  $J = 9.3$  Hz, 1H), 7.41 (t,  $J = 7.6$  Hz, 2H), 7.36 (d,  $J = 9.2$  Hz,

1H), 7.31 (t,  $J = 7.4$  Hz, 1H), 6.58 (s, 2H), 4.31 (s, 1H).  $^{13}\text{C}$  NMR (126 MHz, DMSO- $d_6$ )  $\delta$  167.60, 149.88, 141.31, 138.88, 133.32, 132.02 (2C), 129.08 (2C), 128.49, 128.22, 126.96 (2C), 126.79, 121.34, 118.74, 117.92, 113.07 (2C), 107.79, 82.81, 80.47. ESI-MS  $m/z$ : 354.10 ( $\text{MH}^+$ ).

**5.10 Preparation of 4-((2-(4-ethynylphenyl)imidazo[1,2-a]pyridin-3-yl)amino)benzoic acid (25b).** Treatment of methyl 4-((2-(4-ethynylphenyl)imidazo[1,2-a]pyridin-3-yl)amino)benzoate (**24b**) as outlined in general procedure D (60 °C, 18 h) and purification by preparative HPLC (linear gradient of 10% B to 50% B over 20 min with a flow rate 20 mL/min; retention time = 13.5 min) provided 4-((2-(4-ethynylphenyl)imidazo[1,2-a]pyridin-3-yl)amino)benzoic acid (**25b**) as a white solid (67 % yield).  $^1\text{H}$  NMR (500 MHz, DMSO- $d_6$ )  $\delta$  12.43 (brs, 1H), 9.07 (s, 1H), 8.21 (d,  $J = 6.8$  Hz, 1H), 7.96 (d,  $J = 8.5$  Hz, 2H), 7.86 (d,  $J = 9.0$  Hz, 1H), 7.77 (d,  $J = 9.1$  Hz, 2H), 7.69 (t,  $J = 7.9$  Hz, 1H), 7.61 (d,  $J = 8.5$  Hz, 2H), 7.23 (t,  $J = 6.8$  Hz, 1H), 6.69 (d,  $J = 8.2$  Hz, 2H), 4.33 (s, 1H).  $^{13}\text{C}$  NMR (126 MHz, DMSO- $d_6$ )  $\delta$  167.55, 149.32, 140.69, 133.09, 132.75 (2C), 132.00 (2C), 130.77, 130.28, 127.19 (2C), 124.66, 122.52, 121.87, 119.59, 115.58 (2C), 113.35 (2C), 83.58, 82.81. ESI-MS  $m/z$ : 354.1 ( $\text{MH}^+$ ).

**5.11 Preparation of 4-((2-(4-(prop-2-yn-1-yloxy)phenyl)imidazo[1,2-a]pyridin-3-yl)amino)benzoic acid (25c).** Treatment of methyl 4-((2-(4-(prop-2-yn-1-yloxy)phenyl)imidazo[1,2-a]pyridin-3-yl)amino)benzoate (**24c**) as outlined in general procedure D (65 °C, 18 h) and purification by preparative HPLC (linear gradient of 10% B to 50% B over 20 min with a flow rate 20 mL/min; retention time = 13.9 min) provided 4-((2-(4-(prop-2-yn-1-yloxy)phenyl)imidazo[1,2-a]pyridin-3-yl)amino)benzoic acid (**25c**) as a white solid (70 % yield).  $^1\text{H}$  NMR (500 MHz, DMSO- $d_6$ )  $\delta$  12.45 (brs, 1H), 9.06 (s, 1H), 8.30 (d,  $J = 6.6$  Hz, 1H), 7.92 (d,  $J = 9.0$  Hz, 1H), 7.87 (d,  $J = 8.9$  Hz, 2H), 7.83 (d,  $J = 7.8$  Hz, 1H), 7.77 (d,  $J = 9.1$  Hz, 2H), 7.34

(t,  $J = 7.0$  Hz, 1H), 7.15 (d,  $J = 8.9$  Hz, 2H), 6.73 (d,  $J = 8.3$  Hz, 2H), 4.86 (d,  $J = 2.4$  Hz, 2H), 3.60 (t,  $J = 2.3$  Hz, 1H).  $^{13}\text{C}$  NMR (126 MHz, DMSO- $d_6$ )  $\delta$  165.42, 147.22, 137.32, 129.86 (2C), 126.57 (2C), 122.84, 119.88, 118.41, 116.40, 116.05, 114.34, 113.85 (2C), 113.69, 112.17, 111.33, 111.30 (2C), 77.25, 76.90, 53.88. ESI-MS  $m/z$ : 384.1 ( $\text{MH}^+$ ).

**5.12 Preparation of 4-((2-(4-ethynylphenyl)-7-phenylimidazo[1,2-a]pyridin-3-yl)amino)benzoic acid (25d).** Treatment of methyl 4-((2-(4-ethynylphenyl)-7-phenylimidazo[1,2-a]pyridin-3-yl)amino)benzoate (**24d**) as outlined in general procedure D (65 °C, 18 h) and purification by preparative HPLC (linear gradient of 20% B to 60% B over 20 min with a flow rate 20 mL/min; retention time = 12.9 min) provided 4-((2-(4-ethynylphenyl)-7-phenylimidazo[1,2-a]pyridin-3-yl)amino)benzoic acid (**25d**) as a brown solid (95 % yield).  $^1\text{H}$  NMR (500 MHz, DMSO- $d_6$ )  $\delta$  9.09 (s, 1H), 8.23 (d,  $J = 7.1$  Hz, 1H), 8.09 (dd,  $J = 1.8, 0.9$  Hz, 1H), 7.99 (d,  $J = 8.5$  Hz, 2H), 7.89 (d,  $J = 7.1$  Hz, 2H), 7.78 (d,  $J = 9.1$  Hz, 2H), 7.61 (d,  $J = 8.5$  Hz, 2H), 7.57 (t,  $J = 7.5$  Hz, 3H), 7.53 – 7.48 (m, 1H), 6.72 (d,  $J = 8.3$  Hz, 2H), 4.32 (s, 1H).  $^{13}\text{C}$  NMR (126 MHz, DMSO- $d_6$ )  $\delta$  167.56, 149.39, 141.33, 137.31, 132.73 (2C), 132.38, 132.03 (2C), 131.32, 129.95, 129.79 (2C), 129.69, 127.47 (2C), 127.17 (2C), 124.72, 122.44, 121.85, 119.45, 114.43, 113.39 (2C), 111.85, 83.63, 82.77. ESI-MS  $m/z$ : 430.1 ( $\text{MH}^+$ ).

**5.13 Preparation of 4-((7-phenyl-2-(4-(prop-2-yn-1-yloxy)phenyl)imidazo[1,2-a]pyridin-3-yl)amino)benzoic acid (25e).** Treatment of methyl 4-((7-phenyl-2-(4-(prop-2-yn-1-yloxy)phenyl)imidazo[1,2-a]pyridin-3-yl)amino)benzoate (**24e**) as outlined in general procedure D (rt, 24 h) and purification by preparative HPLC (linear gradient of 20% B to 50% B over 20 min with a flow rate 20 mL/min; retention time = 14.8 min) provided 4-((7-phenyl-2-(4-(prop-2-yn-1-yloxy)phenyl)imidazo[1,2-a]pyridin-3-yl)amino)benzoic acid (**25e**) as a pale yellow solid (57 % yield).  $^1\text{H}$  NMR (500 MHz, DMSO- $d_6$ )  $\delta$  12.36 (brs, 1H), 8.86 (s, 1H), 8.00 (t,  $J = 8.4$  Hz,



3H), 7.96 (s, 1H), 7.84 (d,  $J = 7.0$  Hz, 2H), 7.78 (d,  $J = 8.5$  Hz, 2H), 7.51 (t,  $J = 7.7$  Hz, 2H), 7.45 – 7.40 (m, 1H), 7.31 (dd,  $J = 7.2, 1.8$  Hz, 1H), 7.04 (d,  $J = 8.9$  Hz, 2H), 6.60 (s, 2H), 4.82 (d,  $J = 2.4$  Hz, 2H), 3.57 (t,  $J = 2.3$  Hz, 1H).  $^{13}\text{C}$  NMR (126 MHz, DMSO- $d_6$ )  $\delta$  167.65, 157.35, 150.31, 142.81, 138.79, 138.33, 137.17, 132.10 (2C), 129.58 (2C), 128.73, 128.12 (2C), 127.10, 127.05 (2C), 123.49, 121.16, 117.25, 115.41 (2C), 113.83, 112.89 (2C), 112.11, 79.68, 78.77, 55.84. ESI-MS  $m/z$ : 460.2 ( $\text{MH}^+$ ). HRMS caclcd. for  $\text{C}_{29}\text{H}_{22}\text{N}_3\text{O}_3$  ( $\text{MH}^+$ ), 460.1656; found, 460.1641.

**5.14 Preparation of 4-((6-(1-(4-(5-cyanopyridin-2-yl)benzyl)-1H-1,2,3-triazol-4-yl)-2-phenylimidazo[1,2-a]pyridin-3-yl)amino)benzoic acid (7a).** Treatment of 4-((6-ethynyl-2-phenylimidazo[1,2-a]pyridin-3-yl)amino)benzoic acid (**25a**) and 6-(4-(azidomethyl)phenyl)nicotinonitrile (**23**) as outlined in general procedure F and purification by preparative HPLC (linear gradient of 20% B to 50% B over 20 min with a flow rate 20 mL/min, retention time = 15.1 min) provided 4-((6-(1-(4-(5-cyanopyridin-2-yl)benzyl)-1H-1,2,3-triazol-4-yl)-2-phenylimidazo[1,2-a]pyridin-3-yl)amino)benzoic acid (**7a**) as a white solid.  $^1\text{H}$  NMR (400 MHz, DMSO- $d_6$ )  $\delta$  12.38 (brs, 1H), 9.10 (d,  $J = 2.1$  Hz, 1H), 8.85 (s, 1H), 8.80 (s, 1H), 8.47 (s, 1H), 8.40 (dd,  $J = 8.3, 2.2$  Hz, 1H), 8.19 (d,  $J = 8.3$  Hz, 3H), 8.02 (d,  $J = 7.7$  Hz, 2H), 7.84 – 7.70 (m, 4H), 7.49 (d,  $J = 8.0$  Hz, 2H), 7.41 (t,  $J = 7.6$  Hz, 2H), 7.30 (t,  $J = 7.2$  Hz, 1H), 6.61 (s, 2H), 5.75 (s, 2H). ESI-MS  $m/z$ : 589.20 ( $\text{MH}^+$ ). HRMS caclcd. for  $\text{C}_{35}\text{H}_{24}\text{N}_8\text{O}_2$  ( $\text{MH}^+$ ), 589.2095; found, 589.2117.

**5.15 Preparation of 4-((2-(4-(1-(4-(5-cyanopyridin-2-yl)benzyl)-1H-1,2,3-triazol-4-yl)phenyl)imidazo[1,2-a]pyridin-3-yl)amino)benzoic acid (7b).** Treatment of 4-((2-(4-ethynylphenyl)imidazo[1,2-a]pyridin-3-yl)amino)benzoic acid (**25b**) and 6-(4-(azidomethyl)phenyl)nicotinonitrile (**23**) as outlined in general procedure F and purification by

preparative HPLC (linear gradient of 20% B to 50% B over 20 min with a flow rate 20 mL/min, retention time = 14.5 min) provided 4-((2-(4-(1-(4-(5-cyanopyridin-2-yl)benzyl)-1H-1,2,3-triazol-4-yl)phenyl)imidazo[1,2-a]pyridin-3-yl)amino)benzoic acid (**7b**) as a white solid (33 % yield). <sup>1</sup>H NMR (400 MHz, DMSO-d<sub>6</sub>) δ 12.32 (s, 1H), 9.11 – 9.08 (m, 1H), 8.90 (s, 1H), 8.69 (s, 1H), 8.40 (dd, *J* = 8.4, 2.2 Hz, 1H), 8.20 (d, *J* = 8.4 Hz, 3H), 8.08 (d, *J* = 8.5 Hz, 2H), 8.04 (d, *J* = 6.9 Hz, 1H), 7.91 (d, *J* = 8.4 Hz, 2H), 7.76 (d, *J* = 9.1 Hz, 2H), 7.70 (d, *J* = 9.1 Hz, 1H), 7.51 (d, *J* = 8.4 Hz, 2H), 7.45 – 7.39 (m, 1H), 7.01 (brs, 1H), 6.60 (d, *J* = 8.3 Hz, 2H), 5.75 (s, 2H). ESI-MS *m/z*: 589.2 (MH<sup>+</sup>). HRMS caclcd. for C<sub>35</sub>H<sub>25</sub>N<sub>8</sub>O<sub>2</sub> (MH<sup>+</sup>), 589.2095; found, 589.2106.

**5.16 Preparation of 4-((2-(4-((1-(4-(5-cyanopyridin-2-yl)benzyl)-1H-1,2,3-triazol-4-yl)methoxy)phenyl)imidazo[1,2-a]pyridin-3-yl)amino)benzoic acid (7c).** Treatment of 4-((2-(4-(prop-2-yn-1-yloxy)phenyl)imidazo[1,2-a]pyridin-3-yl)amino)benzoic acid (**25c**) and 6-(4-(azidomethyl)phenyl)nicotinonitrile (**23**) as outlined in general procedure F and purification by preparative HPLC (linear gradient of 20% B to 50% B over 20 min with a flow rate 20 mL/min, retention time = 14.2 min) provided 4-((2-(4-((1-(4-(5-cyanopyridin-2-yl)benzyl)-1H-1,2,3-triazol-4-yl)methoxy)phenyl)imidazo[1,2-a]pyridin-3-yl)amino)benzoic acid (**7c**) as a white solid. <sup>1</sup>H NMR (400 MHz, DMSO-d<sub>6</sub>) δ 12.30 (s, 1H), 9.10 – 9.05 (m, 1H), 8.80 (s, 1H), 8.38 (dd, *J* = 8.4, 2.2 Hz, 1H), 8.34 (s, 1H), 8.21 – 8.14 (m, 3H), 7.97 (d, *J* = 6.8 Hz, 1H), 7.94 (d, *J* = 8.9 Hz, 2H), 7.74 (d, *J* = 9.0 Hz, 2H), 7.65 (d, *J* = 9.0 Hz, 1H), 7.45 (d, *J* = 8.4 Hz, 2H), 7.36 (s, 1H), 7.08 (d, *J* = 8.9 Hz, 2H), 6.96 (brs, 1H), 6.54 (brs, 2H), 5.71 (s, 2H), 5.17 (s, 2H). ESI-MS *m/z*: 619.20 (MH<sup>+</sup>). HRMS caclcd. for C<sub>36</sub>H<sub>27</sub>N<sub>8</sub>O<sub>3</sub> (MH<sup>+</sup>), 619.2201; found, 619.2232.

**5.17 Preparation of 4-((2-(4-(1-(4-(5-cyanopyridin-2-yl)benzyl)-1H-1,2,3-triazol-4-yl)phenyl)-7-phenylimidazo[1,2-a]pyridin-3-yl)amino)benzoic acid (7d).** Treatment of 4-((2-(4-ethynylphenyl)-7-phenylimidazo[1,2-a]pyridin-3-yl)amino)benzoic acid (**25d**) and 6-(4-

(azidomethyl)phenyl)nicotinonitrile (**23**) as outlined in general procedure F and purification by preparative HPLC (linear gradient of 30% B to 50% B over 20 min with a flow rate 20 mL/min, retention time = 13.9 min) provided 4-((2-(4-(1-(4-(5-cyanopyridin-2-yl)benzyl)-1H-1,2,3-triazol-4-yl)phenyl)-7-phenylimidazo[1,2-a]pyridin-3-yl)amino)benzoic acid (**7d**) as a white solid. <sup>1</sup>H NMR (400 MHz, DMSO-d<sub>6</sub>) δ 12.35 (brs, 1H), 9.10 (dd, *J* = 2.2, 0.9 Hz, 1H), 8.98 (s, 1H), 8.70 (s, 1H), 8.41 (dd, *J* = 8.4, 2.2 Hz, 1H), 8.21 (d, *J* = 8.3 Hz, 3H), 8.14 (d, *J* = 7.2 Hz, 1H), 8.09 (d, *J* = 8.6 Hz, 2H), 8.02 (s, 1H), 7.94 (d, *J* = 8.5 Hz, 2H), 7.88 (d, *J* = 7.2 Hz, 2H), 7.78 (d, *J* = 9.1 Hz, 2H), 7.58 – 7.42 (m, 6H), 6.67 (d, *J* = 8.2 Hz, 2H), 5.76 (s, 2H). ESI-MS *m/z*: 665.2 (MH<sup>+</sup>). HRMS cacl. for C<sub>41</sub>H<sub>29</sub>N<sub>8</sub>O<sub>2</sub> (MH<sup>+</sup>), 665.2408; found, 665.2420.

**5.18 Preparation of 4-((2-(4-((1-(4-(5-cyanopyridin-2-yl)benzyl)-1H-1,2,3-triazol-4-yl)methoxy)phenyl)-7-phenylimidazo[1,2-a]pyridin-3-yl)amino)benzoic acid (**7e**).** Treatment of 4-((7-phenyl-2-(4-(prop-2-yn-1-yloxy)phenyl)imidazo[1,2-a]pyridin-3-yl)amino)benzoic acid (**25e**) and 6-(4-(azidomethyl)phenyl)nicotinonitrile (**23**) as outlined in general procedure F and purification by preparative HPLC (linear gradient of 30% B to 50% B over 20 min with a flow rate 20 mL/min, retention time = 13.9 min) provided 4-((2-(4-((1-(4-(5-cyanopyridin-2-yl)benzyl)-1H-1,2,3-triazol-4-yl)methoxy)phenyl)-7-phenylimidazo[1,2-a]pyridin-3-yl)amino)benzoic acid (**7e**) as a white solid. <sup>1</sup>H NMR (500 MHz, DMSO-d<sub>6</sub>) δ 12.31 (brs, 1H), 9.01 (d, *J* = 2.1 Hz, 1H), 8.91 (s, 1H), 8.32 (dd, *J* = 8.4, 2.2 Hz, 1H), 8.28 (s, 1H), 8.14 – 8.09 (m, 4H), 7.96 (s, 1H), 7.83 (dd, *J* = 14.8, 7.9 Hz, 4H), 7.70 (d, *J* = 9.1 Hz, 2H), 7.50 (t, *J* = 7.6 Hz, 3H), 7.43 (t, *J* = 7.3 Hz, 1H), 7.39 (d, *J* = 8.5 Hz, 2H), 7.09 (d, *J* = 8.4 Hz, 2H), 6.62 (s, 2H), 5.64 (s, 2H), 5.13 (s, 2H). ESI-MS *m/z*: 695.2 (MH<sup>+</sup>). HRMS cacl. for C<sub>42</sub>H<sub>31</sub>N<sub>8</sub>O<sub>3</sub> (MH<sup>+</sup>), 695.2514; found, 695.2520.

## 6. Preparation of ether-linked imidazopyridines (**8a, b**)

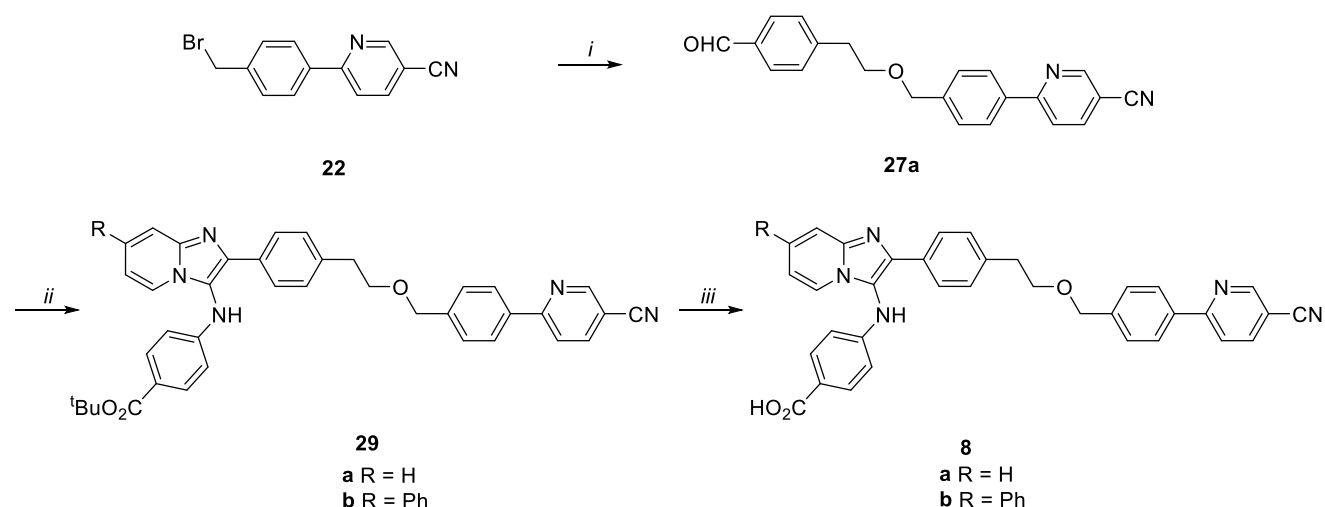

**Scheme S4.** Synthesis of ether-linked imidazopyridines **8a,b**. *Reagents and conditions:* (i) HOCH<sub>2</sub>CH<sub>2</sub>PhCHO (**26**), DIPEA, 150 °C; (ii) 2-aminopyridine (**16b**) or 4-phenylpyridin-2-amine (**16a**), CNPhCO<sub>2</sub><sup>t</sup>Bu (**28**), AcOH, MeOH; (iii) TFA, DCM.

### 6.1 Preparation of 6-(4-((4-formylphenoxy)methyl)phenyl)nicotinonitrile (**27a**).

Treatment of commercially available 4-(2-hydroxyethyl)benzaldehyde (**26**) and 6-(4-(bromomethyl)phenyl)nicotinonitrile (**22**) as outlined in general procedure H provided the title compound (**27a**) as a white solid (60 % yield). <sup>1</sup>H NMR (400 MHz, CDCl<sub>3</sub>) δ 9.98 (s, 1H), 8.91 (dd, *J* = 2.2, 0.9 Hz, 1H), 8.02 – 7.96 (m, 3H), 7.84 – 7.79 (m, 3H), 7.41 (dd, *J* = 8.2, 1.7 Hz, 4H), 4.59 (s, 2H), 3.77 (t, *J* = 6.6 Hz, 2H), 3.03 (t, *J* = 6.6 Hz, 2H). <sup>13</sup>C NMR (101 MHz, CDCl<sub>3</sub>) δ 192.01, 160.12, 152.45, 146.57, 141.03, 139.90, 136.64, 134.85, 129.88 (2C), 129.68 (2C), 128.00 (2C), 127.45 (2C), 119.90, 117.03, 107.83, 72.46, 70.58, 36.57. ESI-MS *m/z*: 343.10 (MH<sup>+</sup>).

**6.2 Preparation of *tert*-butyl 4-isocyanobenzoate (**28**)**<sup>6</sup>. The mixture of formic acid (3.2 mL, 85 mmol) and acetic anhydride (7.34 ml, 78 mmol) was heated (55 °C, 2 h) and cooled to rt. The mixture was added dropwise to a solution of commercially available *tert*-butyl 4-

aminobenzoate (5 g, 26 mmol) in THF (50 mL) at 0 °C. The mixture was stirred (rt, 2 h). The solution was concentrated, and the residue oil was purified by silica gel chromatography. A mixture of *tert*-butyl 4-formamidobenzoate and (*E*)-*N*-(4-(*tert*-butoxycarbonyl)phenyl)formimidic acid (5.8 g) was afforded as a white solid, which was used in the next reaction directly. [<sup>1</sup>H NMR (400 MHz, CDCl<sub>3</sub>) δ 8.84 (d, *J* = 11.2 Hz, 1H), 8.61 (d, *J* = 11.1 Hz, 1H), 8.43 (d, *J* = 1.8 Hz, 1H), 7.97 (dd, *J* = 9.6, 8.7 Hz, 4H), 7.84 (s, 1H), 7.62 (d, *J* = 8.7 Hz, 2H), 7.13 (d, *J* = 8.7 Hz, 2H), 1.60 (s, 9H), 1.59 (s, 9H). <sup>13</sup>C NMR (101 MHz, CDCl<sub>3</sub>) δ 165.28, 165.03, 162.13, 159.15, 140.65, 140.49, 131.36 (2C), 130.70 (2C), 128.58, 128.06, 119.00 (2C), 117.15 (2C), 81.32, 81.11, 28.22 (6C). ESI-MS *m/z*: 166.10 (MH<sup>+</sup>-<sup>t</sup>Bu), 222.10 (MH<sup>+</sup>).] *tert*-Butyl 4-formamidobenzoate (5.69 g, 26 mmol) and triethylamine (10.7 mL, 77 mmol) were dissolved in THF (50 mL). Phosphoryl trichloride (POCl<sub>3</sub>, 2.9 mL, 31 mmol) was added dropwise at 0 °C. The formed yellow suspension was stirred (0 °C, 1 h) and quenched by Na<sub>2</sub>CO<sub>3</sub> (sat. aq.) at 0 °C. The reaction mixture was extracted by DCM, washed by brine and dried by Na<sub>2</sub>SO<sub>4</sub>. The solution was filtered and concentrated. The residue was purified by silica gel column chromatography. Compound *tert*-butyl 4-isocyanobenzoate (**28**, 4.39 g) was afforded as a light green solid (84 % yield for two steps). <sup>1</sup>H NMR (400 MHz, CDCl<sub>3</sub>) δ 8.03 (d, *J* = 8.6 Hz, 2H), 7.42 (d, *J* = 8.6 Hz, 2H), 1.61 (s, 9H). <sup>13</sup>C NMR (101 MHz, CDCl<sub>3</sub>) δ 166.74, 164.06, 132.82, 130.66 (2C), 129.54, 126.25 (2C), 82.01, 28.11(3C). ESI-MS *m/z*: 204.10 (MH<sup>+</sup>).

### 6.3 Preparation of *tert*-butyl 4-((2-(4-(2-((4-(5-((λ<sup>2</sup>-azaneylidene)-λ<sup>3</sup>-methyl)pyridin-2-yl)phenyl)methoxy)ethyl)phenyl)imidazo[1,2-*a*]pyridin-3-yl)amino)benzoate (**29a**).

Treatment of pyridin-2-amine (**16b**), and 6-(4-(4-formylphenoxy)methyl)phenyl)nicotinonitrile (**27a**), acetic acid and *tert*-butyl 4-isocyanobenzoate (**28**) as outlined in general procedure B (75 °C, 16 h) provided the title

compound (**29a**) as a white solid (21 % yield). <sup>1</sup>H NMR (500 MHz, DMSO-d<sub>6</sub>) δ 9.01 (d, *J* = 2.2 Hz, 1H), 8.73 (s, 1H), 8.31 (dd, *J* = 8.4, 2.3 Hz, 1H), 8.11 (dd, *J* = 8.4, 0.9 Hz, 1H), 8.06 (d, *J* = 8.3 Hz, 2H), 7.88 – 7.83 (m, 3H), 7.62 (d, *J* = 8.5 Hz, 2H), 7.57 (d, *J* = 9.0 Hz, 1H), 7.36 (d, *J* = 8.1 Hz, 2H), 7.28 – 7.23 (m, 1H), 7.21 (d, *J* = 8.0 Hz, 2H), 6.86 (td, *J* = 6.8, 1.2 Hz, 1H), 6.47 (s, 2H), 4.49 (s, 2H), 3.62 (t, *J* = 6.8 Hz, 2H), 2.81 (t, *J* = 6.8 Hz, 2H), 1.40 (s, 9H). <sup>13</sup>C NMR (126 MHz, DMSO-d<sub>6</sub>) δ 165.36, 159.35, 153.00, 150.25, 142.41, 141.74, 141.39, 139.08, 138.16, 136.38, 131.80, 131.74 (2C), 129.53 (2C), 128.26 (2C), 127.63 (2C), 126.80 (2C), 125.72, 123.42, 121.74, 120.54, 117.85, 117.78, 117.63, 112.90 (3C), 107.75, 79.99, 71.70, 71.05, 35.76, 28.36 (3C). ESI-MS *m/z*: 622.20 (MH<sup>+</sup>).

**6.4 Preparation of 4-((2-(4-(2-((4-(5-((λ<sup>2</sup>-azaneylidene)-λ<sup>3</sup>-methyl)pyridin-2-yl)phenyl)methoxy)ethyl)phenyl)imidazo[1,2-*a*]pyridin-3-yl)amino)benzoic acid (**8a**).**

Treatment of *tert*-butyl 4-((2-(4-(2-((4-(5-((λ<sup>2</sup>-azaneylidene)-λ<sup>3</sup>-methyl)pyridin-2-yl)phenyl)methoxy)ethyl)phenyl)imidazo[1,2-*a*]pyridin-3-yl)amino)benzoate (**29a**) as outlined in general procedure G (rt, 1.5 h) and purification by preparative HPLC (with eluent solvent B from 25 % to 50% within 20 min, flow rate: 20 mL/min, retention time = 14.5 min.) provided the title compound (**8a**) as a white solid (39 % yield). <sup>1</sup>H NMR (500 MHz, DMSO-d<sub>6</sub>) δ 12.40 (brs, 1H), 9.09 (dd, *J* = 2.2, 0.9 Hz, 1H), 9.05 (s, 1H), 8.39 (dd, *J* = 8.4, 2.2 Hz, 1H), 8.27 (d, *J* = 6.9 Hz, 1H), 8.19 (dd, *J* = 8.4, 0.9 Hz, 1H), 8.13 (d, *J* = 8.3 Hz, 2H), 7.90 (d, *J* = 9.0 Hz, 1H), 7.86 (d, *J* = 8.4 Hz, 2H), 7.77 (d, *J* = 9.0 Hz, 3H), 7.46 – 7.39 (m, 4H), 7.30 (s, 1H), 6.72 (d, *J* = 8.3 Hz, 2H), 4.57 (s, 2H), 3.71 (t, *J* = 6.7 Hz, 2H), 2.93 (t, *J* = 6.7 Hz, 2H). <sup>13</sup>C NMR (126 MHz, DMSO-d<sub>6</sub>) δ 167.54, 159.32, 153.00, 149.43, 141.68, 141.41, 136.41, 131.98 (2C), 130.05 (2C), 128.27 (4C), 127.63 (4C), 127.10 (2C), 124.85, 121.91, 120.54 (2C), 119.01, 118.19, 117.78, 115.83,

113.38 (2C), 107.77, 71.71, 70.80, 35.73. DUIS-MS m/z: 566.3 (MH<sup>+</sup>); 564.2 (M-H)<sup>-</sup>. ESI-MS m/z: 566.10 (MH<sup>+</sup>).

**6.5 Preparation of *tert*-butyl 4-((2-(4-(2-((4-(5-((λ<sup>3</sup>-azaneylidene)-λ<sup>3</sup>-methyl)pyridin-2-yl)phenyl)methoxy)ethyl)phenyl)-7-phenylimidazo[1,2-a]pyridin-3-yl)amino)benzoate (29b).** Treatment of commercially available 4-phenylpyridin-2-amine (**16a**), and 6-(4-((4-formylphenethoxy)methyl)phenyl)nicotinonitrile (**27a**) and *tert*-butyl 4-isocyanobenzoate (**28**) as outlined in general procedure B (75 °C, 16 h) provided the title compound (**29b**) as a white solid (13 % yield). <sup>1</sup>H NMR (400 MHz, DMSO-*d*<sub>6</sub>) δ 9.08 (dd, *J* = 2.2, 0.8 Hz, 1H), 8.85 (s, 1H), 8.38 (dd, *J* = 8.3, 2.2 Hz, 1H), 8.18 (dd, *J* = 8.4, 0.9 Hz, 1H), 8.13 (d, *J* = 8.4 Hz, 2H), 8.00 (s, 1H), 7.95 (d, *J* = 8.3 Hz, 3H), 7.84 (d, *J* = 7.1 Hz, 2H), 7.72 (d, *J* = 9.1 Hz, 2H), 7.52 (t, *J* = 7.6 Hz, 2H), 7.44 (d, *J* = 7.8 Hz, 3H), 7.31 (dd, *J* = 7.5, 5.2 Hz, 3H), 6.59 (d, *J* = 7.8 Hz, 2H), 4.57 (s, 2H), 3.70 (t, *J* = 6.8 Hz, 2H), 2.90 (t, *J* = 6.8 Hz, 2H), 1.48 (s, 9H). <sup>13</sup>C NMR (126 MHz, DMSO-*d*<sub>6</sub>) δ 165.37, 159.34, 152.99, 150.23, 142.84, 141.74, 141.38, 139.17, 138.94, 138.32, 137.25, 136.38, 131.77 (2C), 129.60 (2C), 129.56 (2C), 128.78 (2C), 128.26, 127.63 (2C), 127.07 (2C), 126.79 (2C), 123.52, 121.81, 120.53 (2C), 117.81, 117.77, 113.96, 112.91 (2C), 112.20, 107.75, 80.00, 71.71, 71.05, 35.77, 28.36 (3C). ESI-MS m/z: 698.30 (MH<sup>+</sup>).

**6.6 Preparation of 4-((2-(4-(2-((4-(5-((λ<sup>2</sup>-azaneylidene)-λ<sup>3</sup>-methyl)pyridin-2-yl)phenyl)methoxy)ethyl)phenyl)-7-phenylimidazo[1,2-a]pyridin-3-yl)amino)benzoic acid (8b).** Treatment of *tert*-butyl 4-((2-(4-(2-((4-(5-((λ<sup>2</sup>-azaneylidene)-λ<sup>3</sup>-methyl)pyridin-2-yl)phenyl)methoxy)ethyl)phenyl)-7-phenylimidazo[1,2-a]pyridin-3-yl)amino)benzoate (**29b**) as outlined in general procedure G (rt, 1.5 h) and purification by preparative HPLC (with eluent solvent B from 30 % to 50% within 20 min, flow rate: 20 mL/min, retention time = 16.8 min.) provided the title compound (**8b**) as a white solid (49 % yield). <sup>1</sup>H NMR (500 MHz, DMSO-*d*<sub>6</sub>)

$\delta$  12.39 (brs, 1H), 9.08 (dd,  $J = 2.3, 0.9$  Hz, 1H), 9.05 (s, 1H), 8.38 (dd,  $J = 8.3, 2.2$  Hz, 1H), 8.27 (d,  $J = 7.2$  Hz, 1H), 8.18 (dd,  $J = 8.4, 0.9$  Hz, 1H), 8.13 (d,  $J = 8.4$  Hz, 2H), 8.07 (s, 1H), 7.89 (td,  $J = 6.2, 3.2$  Hz, 4H), 7.77 (d,  $J = 9.0$  Hz, 2H), 7.62 – 7.55 (m, 3H), 7.51 (t,  $J = 7.3$  Hz, 1H), 7.43 (d,  $J = 8.4$  Hz, 2H), 7.40 (d,  $J = 8.1$  Hz, 2H), 6.73 (d,  $J = 8.3$  Hz, 2H), 4.56 (s, 2H), 3.71 (t,  $J = 6.7$  Hz, 2H), 2.92 (t,  $J = 6.7$  Hz, 2H).  $^{13}\text{C}$  NMR (126 MHz, DMSO- $d_6$ )  $\delta$  167.57, 159.33, 153.00, 149.59, 141.70, 141.41, 140.86, 137.24, 136.41, 132.01 (2C), 129.98 (2C), 129.82 (2C), 128.27 (4C), 127.63 (4C), 127.51 (2C), 127.07 (2C), 124.79, 121.81, 120.54 (2C), 118.76, 118.19, 117.78, 115.83, 114.71, 113.37 (2C), 111.29, 107.77, 71.71, 70.85, 35.75. ESI-MS  $m/z$ : 642.20 ( $\text{MH}^+$ ).

## 7. Preparation of phthalic acid-containing imidazopyridines (9a-c)

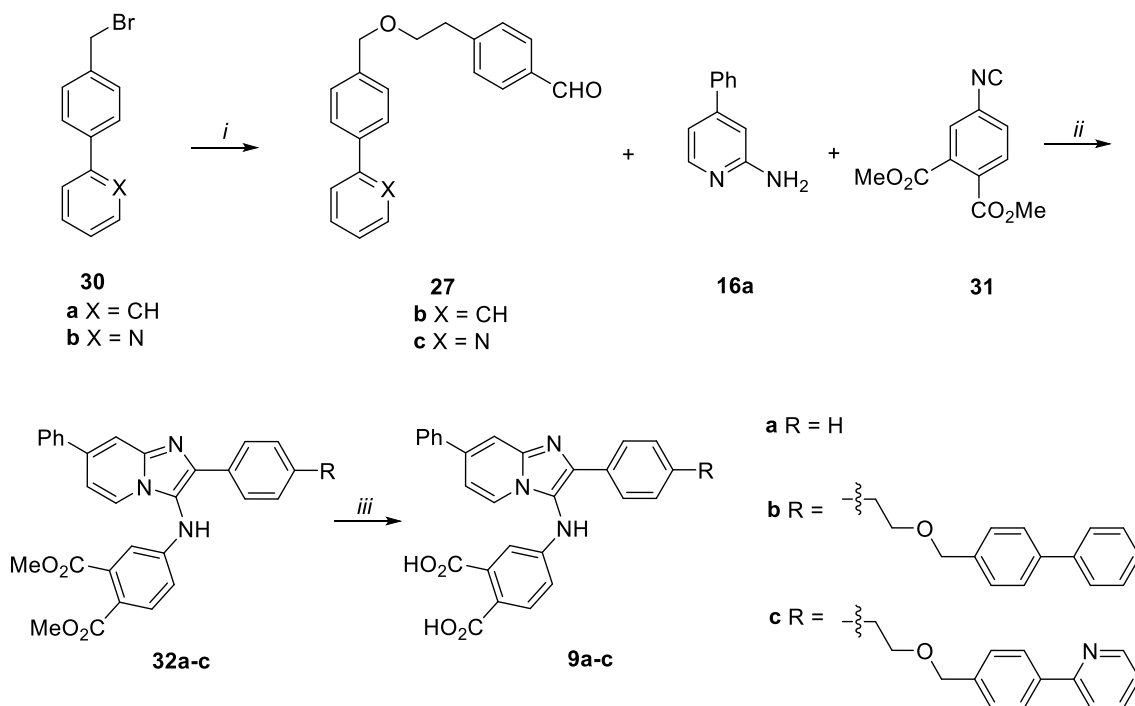



**Scheme S5.** Synthesis of phthalic acid-containing imidazopyridines **9a-c**. *Reagents and conditions:* (i) HOCH<sub>2</sub>CH<sub>2</sub>PhCHO (**26**), DIPEA, 150 °C; (ii) 4-phenylpyridin-2-amine (**16a**), dimethyl 4-isocyanophthalate (**31**), AcOH, MeOH (**32a** from benzaldehyde **12a**; **32b,c** from aldehydes **27b,c**); (iii) NaOH, MeOH.

**7.1 Preparation of dimethyl 4-((2,7-diphenylimidazo[1,2-a]pyridin-3-yl)amino)phthalate (32a).** Treatment of commercially available 4-phenylpyridin-2-amine (**16a**), benzaldehyde (**12a**) with dimethyl 4-isocyanophthalate (**31**) as outlined in general procedure B (rt, 16 h) provided the title compound (**32a**) as a purple oil (55 % yield). <sup>1</sup>H NMR (500 MHz, CDCl<sub>3</sub>) δ 7.90 – 7.87 (m, 2H), 7.75 (s, 1H), 7.69 (t, *J* = 7.9 Hz, 2H), 7.57 (d, *J* = 7.0 Hz, 2H), 7.45 (t, *J* = 7.4 Hz, 2H), 7.41 – 7.36 (m, 1H), 7.31 (t, *J* = 7.4 Hz, 2H), 7.28 – 7.23 (m, 1H), 7.00 (dd, *J* = 7.1, 1.7 Hz, 1H), 6.79 (s, 1H), 6.67 (s, 1H), 6.52 (d, *J* = 7.8 Hz, 1H), 3.85 (s, 3H), 3.81 (s, 3H). <sup>13</sup>C NMR (126 MHz, CDCl<sub>3</sub>) δ 169.36, 166.53, 148.30, 143.33, 140.15, 138.73, 138.23, 136.60, 132.60, 132.29, 129.13 (2C), 128.71 (2C), 128.47, 128.25, 126.89 (2C), 126.75 (2C), 122.35, 120.23, 116.01, 114.10, 113.76, 112.76, 112.61, 52.79, 52.26. ESI-MS *m/z*: 478.20 (MH<sup>+</sup>).

**7.2 Preparation of 4-((2,7-diphenylimidazo[1,2-a]pyridin-3-yl)amino)phthalic acid (9a).** Treatment of dimethyl 4-((2,7-diphenylimidazo[1,2-a]pyridin-3-yl)amino)phthalate (**32a**) as outlined in general procedure D and purification by preparative HPLC (with eluent solvent B from 10 % to 50% within 20 min, flow rate: 20 mL/min, retention time = 17.8 min.) provided the title compound (**9a**) as a pale yellow solid (20 % yield). <sup>1</sup>H NMR (500 MHz, DMSO-*d*<sub>6</sub>) δ 9.07 (s, 1H), 8.23 (d, *J* = 7.1 Hz, 1H), 8.03 (s, 1H), 7.90 (d, *J* = 7.1 Hz, 2H), 7.83 (d, *J* = 7.1 Hz, 2H), 7.57 (d, *J* = 8.5 Hz, 1H), 7.55 – 7.52 (m, 1H), 7.51 (t, *J* = 7.6 Hz, 2H), 7.46 - 7.42 (m, 3H), 7.38 – 7.34 (m, 1H), 6.77 (brs, 1H), 6.63 (brs, 1H). <sup>13</sup>C NMR (126 MHz, DMSO-*d*<sub>6</sub>) δ 170.18,

167.65, 148.47, 141.45, 141.07, 138.10, 137.25, 134.67, 132.11, 130.20, 129.82 (2C), 129.76, 129.60, 129.51 (2C), 127.50 (2C), 127.15 (2C), 124.80, 120.88, 118.59, 114.61, 113.88, 112.63, 111.55. ESI-MS *m/z*: 450.10 (MH<sup>+</sup>). HRMS *cacl.* for C<sub>27</sub>H<sub>20</sub>N<sub>3</sub>O<sub>4</sub> (MH<sup>+</sup>), 450.1448; found, 450.1445.

### 7.3 Preparation of 4-(2-([1,1'-biphenyl]-4-ylmethoxy)ethyl)benzaldehyde (**27b**).

Treatment of commercially available 4-(2-hydroxyethyl)benzaldehyde (**26**) and 4-(bromomethyl)-1,1'-biphenyl (**30a**) as outlined in general procedure H provided the title compound (**27b**) as a white solid (95 % yield). <sup>1</sup>H NMR (400 MHz, CDCl<sub>3</sub>) δ 9.99 (s, 1H), 7.82 (d, *J* = 8.2 Hz, 2H), 7.60 – 7.54 (m, 4H), 7.47 – 7.40 (m, 4H), 7.37 – 7.32 (m, 3H), 4.56 (s, 2H), 3.76 (t, *J* = 6.7 Hz, 2H), 3.02 (t, *J* = 6.7 Hz, 2H). <sup>13</sup>C NMR (101 MHz, CDCl<sub>3</sub>) δ 192.03, 146.66, 140.86, 140.66, 137.17, 134.83, 129.89 (2C), 129.67 (2C), 128.79 (2C), 128.06 (2C), 127.32, 127.19 (2C), 127.10 (2C), 72.81, 70.38, 36.61.

### 7.4 Preparation of 4-((2-(4-(2-([1,1'-biphenyl]-4-ylmethoxy)ethyl)phenyl)-7-phenylimidazo[1,2-a]pyridin-3-yl)amino)phthalic acid (**9b**).

Treatment of 4-phenylpyridin-2-amine (**16a**), 4-(2-([1,1'-biphenyl]-4-ylmethoxy)ethyl)benzaldehyde (**27b**) with dimethyl 4-isocyanophthalate (**31**)<sup>6</sup> as outlined in general procedure B (75 °C, 72 h) and treatment of the formed crude dimethyl 4-((2-(4-(2-([1,1'-biphenyl]-4-ylmethoxy)ethyl)phenyl)-7-phenylimidazo[1,2-a]pyridin-3-yl)amino)phthalate (**32b**) [DUIS-MS *m/z*: 688.2 (MH<sup>+</sup>)] as outlined in general procedure D and purification by preparative HPLC (with eluent solvent B from 20 % to 70% within 20 min, flow rate: 20 mL/min, retention time = 15.7 min.) provided the title compound (**9b**) as a pale colorless solid (12 % yield for two steps). <sup>1</sup>H NMR (500 MHz, DMSO-d<sub>6</sub>) δ 9.14 (s, 1H), 8.37 (d, *J* = 7.1 Hz, 1H), 8.13 (s, 1H), 7.93 (t, *J* = 8.2 Hz, 4H), 7.70 – 7.64 (m, 6H), 7.62 (dd, *J* = 8.2, 6.7 Hz, 2H), 7.58 – 7.54 (m, 1H), 7.52 – 7.44 (m, 4H), 7.43 –

7.37 (m, 3H), 6.90 (s, 1H), 6.76 (s, 1H), 4.57 (s, 2H), 3.75 (t,  $J = 6.8$  Hz, 2H), 2.96 (t,  $J = 6.7$  Hz, 2H).  $^{13}\text{C}$  NMR (126 MHz, DMSO- $d_6$ )  $\delta$  170.17, 167.64, 148.39, 141.31, 140.52, 140.36, 139.72, 138.16, 138.13, 137.02, 132.08, 130.10 (2C), 129.97, 129.87 (2C), 129.41 (3C), 128.53 (3C), 127.87, 127.59 (2C), 127.08 (4C), 127.02 (3C), 125.03, 120.97, 118.49, 115.11, 113.97, 112.67, 110.85, 71.94, 70.66, 35.78. ESI-MS  $m/z$ : 660.2 ( $\text{MH}^+$ ). HRMS calcd. for  $\text{C}_{42}\text{H}_{34}\text{N}_3\text{O}_5$  ( $\text{MH}^+$ ), 660.2493; found, 660.2494.

### 7.5 Preparation of 4-(2-((4-(pyridin-2-yl)benzyl)oxy)ethyl)benzaldehyde (27b).

Treatment of commercially available 4-(2-hydroxyethyl)benzaldehyde (**26**) and -(4-(bromomethyl)phenyl)pyridine (**30b**) as outlined in general procedure H provided the title compound (**27c**) as a white solid (29 % yield).  $^1\text{H}$  NMR (400 MHz,  $\text{CDCl}_3$ )  $\delta$  9.98 (s, 1H), 8.70 – 8.67 (m, 1H), 7.95 (d,  $J = 8.3$  Hz, 2H), 7.81 (d,  $J = 8.1$  Hz, 2H), 7.76 – 7.69 (m, 2H), 7.42 – 7.35 (m, 4H), 7.21 (ddt,  $J = 6.5, 4.9, 1.7$  Hz, 1H), 4.57 (s, 2H), 3.74 (t,  $J = 6.7$  Hz, 2H), 3.01 (t,  $J = 6.7$  Hz, 2H).  $^{13}\text{C}$  NMR (101 MHz,  $\text{CDCl}_3$ )  $\delta$  192.03, 157.13, 149.71, 146.64, 139.00, 138.82, 136.77, 134.82, 129.88 (2C), 129.67 (2C), 127.93 (2C), 126.96 (2C), 122.15, 120.48, 72.70, 70.32, 36.59. ESI-MS  $m/z$ : 318.20 ( $\text{MH}^+$ ), 340.10 ( $\text{MNa}^+$ ).

**7.6 Preparation of 4-((7-phenyl-2-(4-(2-((4-(pyridin-2-yl)benzyl)oxy)ethyl)phenyl)imidazo[1,2-a]pyridin-3-yl)amino)phthalic acid (9c).** Treatment of 4-phenylpyridin-2-amine (**16a**), 4-(2-((4-(pyridin-2-yl)benzyl)oxy)ethyl)benzaldehyde (**27c**) with dimethyl 4-isocyanophthalate (**31**)<sup>6</sup> as outlined in general procedure B (75 °C, 72 h) and treatment of the formed crude dimethyl 4-((7-phenyl-2-(4-(2-((4-(pyridin-2-yl)benzyl)oxy)ethyl)phenyl)imidazo[1,2-a]pyridin-3-yl)amino)phthalate (**32c**) [DUIS-MS  $m/z$ : 689.2 ( $\text{MH}^+$ )] as outlined in general procedure D and purification by preparative HPLC (with eluent solvent B from 10 % to 40% within 20 min, flow rate: 20 mL/min, retention time = 17.3

min.) provided the title compound (**9c**) as a white solid (9 % yield for two steps). <sup>1</sup>H NMR (500 MHz, DMSO-d<sub>6</sub>) δ 9.18 (s, 1H), 8.71 (d, *J* = 4.7 Hz, 1H), 8.41 (d, *J* = 7.1 Hz, 1H), 8.16 (s, 1H), 8.07 (d, *J* = 8.3 Hz, 2H), 8.00 (d, *J* = 7.9 Hz, 1H), 7.98 – 7.93 (m, 3H), 7.91 (d, *J* = 8.1 Hz, 2H), 7.73 (dd, *J* = 7.2, 1.8 Hz, 1H), 7.67 (d, *J* = 8.5 Hz, 1H), 7.63 (t, *J* = 7.4 Hz, 2H), 7.57 (t, *J* = 7.3 Hz, 1H), 7.48 (d, *J* = 8.1 Hz, 2H), 7.44 (d, *J* = 8.1 Hz, 2H), 7.42 (ddd, *J* = 7.3, 4.8, 1.2 Hz, 1H), 6.93 (s, 1H), 6.79 (d, *J* = 8.2 Hz, 1H), 4.59 (s, 2H), 3.76 (t, *J* = 6.7 Hz, 2H), 2.98 (t, *J* = 6.7 Hz, 2H). <sup>13</sup>C NMR (126 MHz, DMSO-d<sub>6</sub>) δ 170.07, 167.64, 156.02, 149.57, 148.25, 142.87, 141.51, 140.26, 140.11, 138.21, 138.07, 137.81, 136.91, 133.22, 132.03, 130.13 (2C), 130.08, 129.88 (2C), 128.21 (2C), 127.62 (2C), 127.16 (2C), 126.99 (2C), 126.64, 125.16, 123.16, 121.21, 120.92, 118.67, 115.43, 114.06, 112.83, 110.53, 71.91, 70.72, 35.78. ESI-MS *m/z*: 661.2 (MH<sup>+</sup>). LCRT = 14.926 min. HRMS cacl. for C<sub>41</sub>H<sub>33</sub>N<sub>4</sub>O<sub>5</sub> (MH<sup>+</sup>), 661.2445; found, 661.2445. HRMS cacl. for C<sub>41</sub>H<sub>34</sub>N<sub>4</sub>O<sub>5</sub> (MH<sub>2</sub><sup>2+</sup>), 331.1259; found, 331.1256.

## II. BIOLOGICAL EVALUATION

### 1. TDP1 inhibition assay

The inhibition of TDP1 was conducted according to gel-based methods as previously described.<sup>9,10</sup> Briefly, 1 nM of the DNA substrate (N14Y, 5'-Cy5-GATCTAAAAGACTT-pY-3') was incubated with 40 pM recombinant TDP1 in the absence or presence of inhibitors for 15 min at room temperature in TDP1 reaction buffer (50 mM Tris-HCl, pH 7.5, 80 mM KCl, 2 mM EDTA, 1 mM DTT, 40 μg/mL BSA and 0.01% Tween 20). The inhibition of TDP2 was also conducted by using similar conditions. Briefly, 1 nM of DNA substrate (YN18, 5'-pY-TCCGTTGAAGCCTGCTTT-Cy5-3') was incubated with 40 pM recombinant TDP2 in the absence or presence of inhibitors for 15 min at RT in TDP2

reaction buffer (50 mM Tris-HCl, pH 7.5, 80 mM KCl, 5 mM MgCl<sub>2</sub>, 0.1 mM EDTA, 1 mM DTT, 40 µg/mL BSA, and 0.01% Tween 20). The reactions of both TDP1 and TDP2 were stopped by adding an equal volume of gel loading buffer (99.5% (v/v) formamide, 5 mM EDTA). The samples were then subjected to a 20% denaturing PAGE gel followed by gel scanning using a Typhoon FLA 9500 scanner (GE Healthcare). The IC<sub>50</sub> values of the TDP1 inhibitors were calculated by comparing the percentage of the cleavage product (N14P, 5'-Cy5-GATCTAAAAGACTT-p-3') produced to that in the DMSO control. The IC<sub>50</sub> values of the TDP2 inhibitors were calculated by comparing the percentage of the cleavage product (PN18, 5'-p-TCCGTTGAAGCCTGCTTT-Cy5-3') produced to that in the DMSO control.

## **2. Survival curve and cytotoxicity**

HCT116 cells were seeded in a 384-well black-clear plate until 30% confluency and then incubated with a two-fold serial dilution of TDP1 inhibitors for 72 h at 37 °C (0.39 µM to 200 µM for **7d**; 0.048 to 25 µM for (*E*)-**6-D1** and **8b**). The cell numbers were counted from the brightfield images taken by Biotek Cytation 5. The cell cytotoxicity was calculated based on 50% cell survival using DMSO as a control.

## **3. Synergistic effect of TDP1 inhibitors with camptothecin (CPT) in human colon cancer cell line HCT116.**

The synergistic effects of the TDP1 inhibitors with CPT were tested in human colon cancer cell line HCT116 based on cell viability (Fig. S6). Cells were first seeded in a 384-well black-clear plate until 30% confluency and then incubated with a serial dilution of CPT at the range of 0-100 nM (0, 12.5, 25, 50, 100 nM) in the present or the absence of desired concentrations of TDP1 inhibitors for 72 h at 37 °C. DMSO was used as control. Viable cell numbers were counted from the brightfield images taken by Biotek Cytation 5.

### III. X-RAY CRYSTALLOGRAPHY

#### 1. Protein expression, purification, and crystallization

The catalytic domain of TDP1 (residues S148-S608) was expressed and purified as previously reported.<sup>6,9</sup> Crystals of TDP1 were grown by the hanging drop vapor diffusion method by mixing 2  $\mu$ L of TDP1 (20 mg/mL in 25 mM Tris-HCl pH 7.2, 150 mM NaCl, 2 mM tris(2-carboxyethyl)phosphine) with 2  $\mu$ L of well solution composed of 0.1 M MOPS/HEPES pH 7.5, 10% (w/v) PEG 8000, 20% (v/v) ethylene glycol, 0.03 M sodium fluoride, 0.03 M sodium bromide and 0.03 M sodium iodide and sealed over 500  $\mu$ L of well solution in a Nextal 15-well crystallization plate (Qiagen). Crystals of TDP1 were transferred to a 4  $\mu$ L drop consisting of mother liquor supplemented with 16 mM **9a** or 14.4 mM **9c** (dissolved in DMSO, 10% (v/v) final DMSO concentration in drop), sealed over well solution, and soaked for 48 hours. Crystals for data collection were harvested with a LithoLoop (Mitegen) and flash-cooled by plunging into liquid N<sub>2</sub> without any additional cryoprotectant.

#### 2. Data collection, structure determination, and refinement

X-ray diffraction data sets were collected remotely at the Advanced Photon Source, SER-CAT beamline 22-BM, Argonne National Laboratory. Data were collected using a wavelength of 1.0000 Å, a crystal to detector distance of 200 mm, exposure time of 2 seconds, and an oscillation range of 1.0° with an Rayonix MAR300 HS detector. Diffraction images were processed using HKL3000.<sup>11</sup> The structures were determined by molecular replacement using the previously reported structure of TDP1 (PDB code: 6DHU, chain A)<sup>9</sup> as a search model after removing all solvent and ligand molecules and searching for two molecules in the asymmetric unit with the program PHASER<sup>12</sup> in the PHENIX suite of programs.<sup>13</sup> Electron density maps

were examined for different electron density features (contoured at 3.0s) to identify bound inhibitors. The coordinate files for the inhibitors were prepared using the Molinspiration server ([www.molinspiration.com](http://www.molinspiration.com)) and .cif files for use during refinement were generated using eLBOW<sup>14</sup> in PHENIX. Iterative rounds of manual rebuilding of the structures were performed with COOT<sup>15</sup> followed by refinement with phenix.refine.<sup>16</sup> Water molecules were identified with COOT, manually inspected, and refined with phenix.refine. Model quality and structure validation were performed using MolProbity.<sup>15</sup>

**Table S1** Library of aldehydes using in our oxime library preparation with their structures and the SMILES strings.

| Aldehydes | IUPAC Names                                                 | Structures                                                                          | SMILES                                      |
|-----------|-------------------------------------------------------------|-------------------------------------------------------------------------------------|---------------------------------------------|
| A1        | 3,4-dimethyl-benzaldehyde                                   | 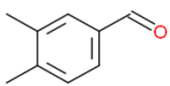  | <chem>Cc1ccc(C=O)cc1C</chem>                |
| A2        | 1-tosyl-1H-pyrrole-2-carbaldehyde                           |  | <chem>Cc1ccc(cc1)S(=O)(=O)n1cccc1C=O</chem> |
| A3        | 2-(4-fluoro-phenyl)-benzaldehyde                            |  | <chem>C(c1ccccc1c1ccc(cc1)F)=O</chem>       |
| A4        | methyl 5-chloro-4-formyl-1-methyl-1H-pyrazole-3-carboxylate |  | <chem>Cn1c(c(C=O)c(C(=O)OC)n1)[Cl]</chem>   |
| A5        | ethyl 4-(2-formyl-phenyl)-piperazine-1-carboxylate          |  | <chem>CCOC(=O)N1CCN(CC1)c1ccccc1C=O</chem>  |
| A6        | 4-(1H-1,2,3,4-tetraazol-5-yl)-benzaldehyde                  |  | <chem>C(c1ccc(cc1)c1nn[nH]1)=O</chem>       |
| A7        | 4-(2-chloro-phenyl)-tetrahydro-2H-pyran-4-carbaldehyde      |  | <chem>C1COCC1(C=O)c1ccccc1[Cl]</chem>       |

|            |                                                                           |  |                                               |
|------------|---------------------------------------------------------------------------|--|-----------------------------------------------|
| <b>A8</b>  | 2-fluoro-6-phenoxy-benzaldehyde                                           |  | <chem>C(c1c(cccc1F)Oc1ccccc1)=O</chem>        |
| <b>A9</b>  | phenyl-methyl 2-formyl-piperidine-1-carboxylate                           |  | <chem>C1CCN(C(C1)C=O)C(=O)OCc1ccccc1</chem>   |
| <b>A10</b> | 6-cyclohexyloxy-pyridine-3-carbaldehyde                                   |  | <chem>C1CCC(CC1)Oc1ccc(C=O)cn1</chem>         |
| <b>A11</b> | 7-thia-9-aza-bicyclo[4.3.0]nona-1,3,5,8-tetraene-8-carbaldehyde           |  | <chem>C(c1nc2ccccc2s1)=O</chem>               |
| <b>A12</b> | 5-(4-methoxy-phenyl)-thiophene-2-carbaldehyde                             |  | <chem>COC1ccc(cc1)c1ccc(C=O)s1</chem>         |
| <b>B1</b>  | 7-thia-bicyclo[4.3.0]nona-1,3,5,8-tetraene-8-carbaldehyde                 |  | <chem>C(c1cc2ccccc2s1)=O</chem>               |
| <b>B2</b>  | 4-(1H-imidazol-1-yl)-benzaldehyde                                         |  | <chem>C(c1ccc(cc1)n1ccn1)=O</chem>            |
| <b>B3</b>  | 2-butyl-1H-imidazole-4-carbaldehyde                                       |  | <chem>CCCCc1nc(C=O)c[nH]1</chem>              |
| <b>B4</b>  | 4-bromo-2H-pyrazole-3-carbaldehyde                                        |  | <chem>C(c1c(c[nH]1)[Br])=O</chem>             |
| <b>B5</b>  | methyl 2-formyl-benzoate                                                  |  | <chem>COC(c1ccccc1C=O)=O</chem>               |
| <b>B6</b>  | 2-amino-3,6-dimethoxy-benzaldehyde                                        |  | <chem>COC1ccc(c(c1C=O)N)OC</chem>             |
| <b>B7</b>  | 4-(2-oxo-pyrrolidin-1-yl)-benzaldehyde                                    |  | <chem>C1CC(N(C1)c1ccc(C=O)cc1)=O</chem>       |
| <b>B8</b>  | 7-allyl-8-methyl-7-aza-bicyclo[4.3.0]nona-1,3,5,8-tetraene-9-carbaldehyde |  | <chem>Cc1c(C=O)c2ccccc2n1CC=C</chem>          |
| <b>B9</b>  | 4-(3-formyl-2,5-dimethyl-1H-pyrrol-1-yl)-benzoic acid                     |  | <chem>Cc1cc(C=O)c(C)n1c1ccc(cc1)C(O)=O</chem> |



|            |                                                                           |                                                                                     |                                                    |
|------------|---------------------------------------------------------------------------|-------------------------------------------------------------------------------------|----------------------------------------------------|
| <b>B10</b> | 7-allyl-7-aza-bicyclo[4.3.0]nona-1,3,5,8-tetraene-9-carbaldehyde          |    | <chem>C=CCn1cc(C=O)c2ccccc12</chem>                |
| <b>B11</b> | 2-(9-formyl-7-aza-bicyclo[4.3.0]nona-1,3,5,8-tetraen-7-yl)-ethanenitrile  |    | <chem>C(C#N)n1cc(C=O)c2ccccc12</chem>              |
| <b>B12</b> | 3-(4-formyl-5-methyl-1H-pyrazol-1-yl)-propanoic acid                      |    | <chem>Cc1c(C=O)cnn1CCC(O)=O</chem>                 |
| <b>C1</b>  | 5,8-dimethyl-1,7-diaza-bicyclo[4.3.0]nona-2,4,6,8-tetraene-9-carbaldehyde |    | <chem>Cc1cccn2c(C=O)c(C)nc12</chem>                |
| <b>C2</b>  | 3-benzyl-3H-imidazole-4-carbaldehyde                                      |    | <chem>C(c1ccccc1)n1cncc1C=O</chem>                 |
| <b>C3</b>  | 3-(pyrimidin-2-yloxy)-benzaldehyde                                        |    | <chem>C(c1cccc(c1)Oc1ncccn1)=O</chem>              |
| <b>C4</b>  | 3-dimethylamino-2-p-tolyl-prop-2-enal                                     |    | <chem>Cc1ccc(cc1)C(=CN(C)C)C=O</chem>              |
| <b>C5</b>  | 1,3-dimethyl-5-(3-(trifluoromethyl)-phenoxy)-1H-pyrazole-4-carbaldehyde   |  | <chem>Cc1c(C=O)c(n(C)n1)Oc1cccc(c1)C(F)(F)F</chem> |
| <b>C6</b>  | 4-dimethylamino-2-(2-formyl-1H-pyrrol-1-yl)-pyridine-3-carbonitrile       |  | <chem>CN(C)c1ccnc(c1C#N)n1cccc1C=O</chem>          |
| <b>C7</b>  | 5-chloro-2-phenyl-1H-imidazole-4-carbaldehyde                             |  | <chem>C(c1c([nH]c(c2ccccc2)n1)[Cl])=O</chem>       |
| <b>C8</b>  | 8-(2-(furan-3-yl)-vinyl)-3-hydroxy-7-oxa-bicyclo[4.3.0]nona-1,3,5,8-      |  | <chem>C(=Cc1c(C=O)c2cc(ccc2o1)O)c1ccoc1</chem>     |
| <b>C9</b>  | 4-(4-(trifluoro-methyl)-pyridin-2-yl)-benzaldehyde                        |  | <chem>C(c1ccc(cc1)c1cc(ccn1)C(F)(F)F)=O</chem>     |
| <b>C10</b> | hexanal                                                                   |  | <chem>CCCCCC=O</chem>                              |
| <b>C11</b> | 2-methyl-2-phenylsulfanyl-propanal                                        |  | <chem>CC(C)(C=O)Sc1ccccc1</chem>                   |

|                          |                                                                                     |                                                                                     |                                               |
|--------------------------|-------------------------------------------------------------------------------------|-------------------------------------------------------------------------------------|-----------------------------------------------|
| <b>C12</b>               | 7-chloro-bicyclo[4.4.0]deca-1,3,5,7-tetraene-8-carbaldehyde                         |    | <chem>C1Cc2ccccc2C(=C1C=O)[Cl]</chem>         |
| <b>D1</b>                | 6-(4-formyl-phenyl)-pyridine-3-carbonitrile                                         |    | <chem>C(c1ccc(cc1)c1ccc(C#N)cn1)=O</chem>     |
| <b>D2</b>                | 4-(thiomorpholin-4-yl)-benzaldehyde                                                 |    | <chem>C1CSCCN1c1ccc(C=O)cc1</chem>            |
| <b>D3</b>                | 4-((2-chloro-thiazol-5-yl)-methoxy)-benzaldehyde                                    |    | <chem>C(c1cnc(s1)[Cl])Oc1ccc(C=O)cc1</chem>   |
| <b>D4</b>                | 3-chloro-8-methyl-2-aza-bicyclo[4.4.0]deca-2,4,7,9-tetraene-4-carbaldehyde          |    | <chem>CC1C=CC2C(C=1)C=C(C=O)C(=N2)[Cl]</chem> |
| <b>D5</b>                | 7-(3-fluoro-phenyl)-4-thia-1,6-diaza-bicyclo[3.3.0]octa-2,5,7-triene-8-carbaldehyde |    | <chem>C(c1c(c2cccc(c2)F)nc2n1ccs2)=O</chem>   |
| <b>D6</b>                | 1-(4-(thiophen-2-yl)-pyrimidin-2-yl)-1H-pyrrole-2-carbaldehyde                      |    | <chem>C(c1cccn1c1nccc(c2cccs2)n1)=O</chem>    |
| <b>D7</b>                | 2-(4-chloro-phenoxy)-pyridine-3-carbaldehyde                                        |  | <chem>C(c1cccnc1Oc1ccc(cc1)[Cl])=O</chem>     |
| <b>D8</b>                | 5-chloro-1-methyl-3-(phenylsulfanyl-methyl)-1H-pyrazole-4-carbaldehyde              |  | <chem>Cn1c(c(C=O)c(CSc2ccccc2)n1)[Cl]</chem>  |
| <b>D9</b>                | 8-ethylsulfanyl-7-methyl-7-aza-bicyclo[4.3.0]nona-1,3,5,8-tetraene-9-carbaldehyde   |  | <chem>CCSc1c(C=O)c2ccccc2n1C</chem>           |
| <b>D10</b>               | 10-formyl-7,9-dioxo-8-oxa-2-aza-bicyclo[4.4.0]deca-1(6),2,4-triene                  |  | <chem>C(C1C(=O)OC(c2cccnc12)=O)=O</chem>      |
| <b>D11</b>               | 1-phenyl-1H-1,2,3-triazole-4-carbaldehyde                                           |  | <chem>C(c1cn(c2ccccc2)nn1)=O</chem>           |
| <b>D12</b> <sup>ii</sup> | N/A                                                                                 | N/A                                                                                 | N/A                                           |
| <b>E1</b>                | 2-(2-cyano-phenyl)-2-(5-formyl-1-methyl-1H-pyrrol-2-yl)-ethanenitrile               |  | <chem>Cn1c(C=O)ccc1C(C#N)c1ccccc1C#N</chem>   |

|                        |                                                                             |                                                                                     |                                                       |
|------------------------|-----------------------------------------------------------------------------|-------------------------------------------------------------------------------------|-------------------------------------------------------|
| <b>E2</b>              | 3-methylsulfanyl-2-aza-bicyclo[4.4.0]deca-1,3,5,7,9-pentaene-4-carbaldehyde |    | <chem>CSc1c(C=O)cc2ccccc2n1</chem>                    |
| <b>E3<sup>ii</sup></b> | N/A                                                                         | N/A                                                                                 | N/A                                                   |
| <b>E4<sup>ii</sup></b> | N/A                                                                         | N/A                                                                                 | N/A                                                   |
| <b>E5</b>              | 1-((2-chloro-thiazol-5-yl)-methyl)-1H-pyrrole-2-carbaldehyde                |    | <chem>C(c1cnc(s1)[Cl])n1cccc1C=O</chem>               |
| <b>E6</b>              | 4-(pyrazin-2-yl)-benzaldehyde                                               |    | <chem>C(c1ccc(cc1)c1cnccn1)=O</chem>                  |
| <b>E7</b>              | 2-(3-chloro-5-(trifluoro-methyl)-pyridin-2-yl)-3-dimethylamino-prop-2-enal  |    | <chem>CN(C)C=C(C=O)c1c(cc(n1)C(F)(F)F)[Cl]</chem>     |
| <b>E8</b>              | 5-methoxy-1,3-dimethyl-1H-pyrazole-4-carbaldehyde                           |    | <chem>Cc1c(C=O)c(n(C)n1)OC</chem>                     |
| <b>E9</b>              | 2-(methyl-(phenyl-methyl)-amino)-thiazole-5-carbaldehyde                    |   | <chem>CN(Cc1ccccc1)c1ncc(C=O)s1</chem>                |
| <b>E10</b>             | methyl 6-formyl-pyridine-3-carboxylate                                      |  | <chem>COC(c1ccc(C=O)nc1)=O</chem>                     |
| <b>E11</b>             | 2-(2-methoxy-4-nitro-phenyl)-acetaldehyde                                   |  | <chem>COc1cc(ccc1CC=O)[N+](=[O-])=O</chem>            |
| <b>E12</b>             | 1-(4-chloro-benzyl)-1H-1,2,3-triazole-4-carbaldehyde                        |  | <chem>C(c1ccc(cc1)[Cl])n1cc(C=O)nn1</chem>            |
| <b>F1</b>              | 5-chloro-6-hydroxy-pyridine-3-carbaldehyde                                  |  | <chem>C(c1cc(c(nc1)O)[Cl])=O</chem>                   |
| <b>F2</b>              | 1-(3,4-dichloro-benzyl)-6-oxo-1,6-dihydro-pyridine-3-carbaldehyde           |  | <chem>C(c1ccc(c(c1)[Cl])[Cl])N1C=C(C=CC1=O)C=O</chem> |
| <b>F3</b>              | 4-(4-(hydroxy-methyl)-piperidin-1-yl)-benzaldehyde                          |  | <chem>C1CN(CCC1CO)c1ccc(C=O)cc1</chem>                |

|            |                                                                                    |                                                                                     |                                                   |
|------------|------------------------------------------------------------------------------------|-------------------------------------------------------------------------------------|---------------------------------------------------|
| <b>F4</b>  | 5-bromo-7-oxa-bicyclo[4.3.0]nona-1(6),2,4-triene-3-carbaldehyde                    | 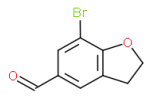   | <chem>C1COc2c1cc(C=O)cc2[Br]</chem>               |
| <b>F5</b>  | 4-((8-thia-7,9-diazabicyclo[4.3.0]nona-1(9),2,4,6-tetraen-3-yl)-methoxy)-          |    | <chem>C(c1ccc2c(c1)nsn2)Oc1ccc(C=O)cc1</chem>     |
| <b>F6</b>  | 4-(1H-pyrazol-1-yl)-benzaldehyde                                                   |    | <chem>C(c1ccc(cc1)n1cccn1)=O</chem>               |
| <b>F7</b>  | 2-(1,1-dimethyl-ethylsulfonyl)-benzaldehyde                                        |    | <chem>CC(C)(C)S(c1ccccc1C=O)(=O)=O</chem>         |
| <b>F8</b>  | 2-formyl-bicyclo[4.4.0]deca-1,3,5,7,9-pentaen-3-yl ethanoate                       |    | <chem>CC(=O)Oc1ccc2ccccc2c1C=O</chem>             |
| <b>F9</b>  | 10-formyl-bicyclo[4.4.0]deca-1(6),2,4,7,9-pentaene-2-carboxylic acid               |    | <chem>C(c1cccc2cccc(C(O)=O)c12)=O</chem>          |
| <b>F10</b> | ethyl 4-chloro-5-formyl-3-methyl-6,7-dihydrobenzofuran-2-carboxylate               |    | <chem>CCOC(c1c(C)c2C(=C(Cc2o1)C=O)[Cl])=O</chem>  |
| <b>F11</b> | 5-formyl-2-hydroxy-4-phenylamino-pyridine-3-carbonitrile                           |   | <chem>C(c1nc(c(C#N)c1Nc1ccccc1)O)=O</chem>        |
| <b>F12</b> | 4-formylphenyl benzo[d][1,3]dioxole-5-carboxylate                                  |  | <chem>C1Oc2ccc(cc2O1)C(=O)Oc1ccc(C=O)cc1</chem>   |
| <b>G1</b>  | 2-formyl-3-methyl-1-oxo-1,2-dihydrobenzo[4,5]imidazo[1,2-a]pyridine-4-carbonitrile |  | <chem>CC1C(C=O)C(n2c3ccccc3nc2C=1C#N)=O</chem>    |
| <b>G2</b>  | 5-formyl-4-(4-methylpyridin-1-ium-1-yl)thiazol-2-olate                             |  | <chem>Cc1cc[n+](cc1)c1c(C=O)sc(n1)[O-]</chem>     |
| <b>G3</b>  | 4-(4-chloro-phenylsulfonyl)-benzaldehyde                                           |  | <chem>C(c1ccc(cc1)S(c1ccc(cc1)[Cl]))(=O)=O</chem> |
| <b>G4</b>  | 7-methoxy-8-phenyl-7-aza-bicyclo[4.3.0]nona-1,3,5,8-tetraene-9-carbaldehyde        |  | <chem>COnc1(c2ccccc2)c(C=O)c2ccccc12</chem>       |
| <b>G5</b>  | 3-(5-chloro-pyridin-2-ylamino)-2-(7-oxa-9-aza-bicyclo[4.3.0]nona-1,3,5,8-          | S52                                                                                 |                                                   |

|                              |                                                                                |                                                                                     |                                                             |
|------------------------------|--------------------------------------------------------------------------------|-------------------------------------------------------------------------------------|-------------------------------------------------------------|
| <b>G6</b>                    | 9-methyl-4-nitro-7,9-diazabicyclo[4.3.0]nona-1,3,5,7-tetraene-8-carbaldehyde   | 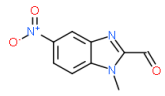   | <chem>Cn1c2ccc(cc2nc1C=O)[N+][O-]=O</chem>                  |
| <b>G7</b>                    | 9-methyl-2-phenyl-9H-benzo[d]imidazo[1,2-a]imidazole-3-carbaldehyde            |    | <chem>Cn1c2ccccc2n2c(C=O)c(c3ccccc3)nc12</chem>             |
| <b>G8</b>                    | 5-(9-methyl-7,9-diazabicyclo[4.3.0]nona-1,3,5,7-tetraen-8-yl)-thiophene-2-     |    | <chem>Cn1c2ccccc2nc1c1ccc(C=O)s1</chem>                     |
| <b>G9</b>                    | 4-hydroxy-6-methyl-2-(piperidin-1-yl)-pyrimidine-5-carbaldehyde                |    | <chem>Cc1c(C=O)c(nc(n1)N1CCCCC1)O</chem>                    |
| <b>G10</b>                   | 2,5-dimethyl-1-(3-nitro-4-(pyrrolidin-1-yl)-phenyl)-1H-pyrrole-3-carbaldehyde  |    | <chem>Cc1cc(C=O)c(C)n1c1ccc(c(c1)[N+][O-])=O)N1CCCC1</chem> |
| <b>G11</b>                   | 4-allyloxy-3-iodo-benzaldehyde                                                 |    | <chem>C=CCOc1ccc(C=O)cc1I</chem>                            |
| <b>G12</b>                   | 1-(2-methoxy-4-nitro-phenyl)-2,5-dimethyl-1H-pyrrole-3-carbaldehyde            |    | <chem>Cc1cc(C=O)c(C)n1c1ccc(cc1OC)[N+][O-]=O</chem>         |
| <b>H1 (D1) <sup>i</sup></b>  | 6-(4-formyl-phenyl)-pyridine-3-carbonitrile                                    |  | <chem>C(c1ccc(cc1)c1ccc(C#N)cn1)=O</chem>                   |
| <b>H2</b>                    | 3-(2-hydroxy-3-nitro-phenyl)-2-methyl-prop-2-enal                              |  | <chem>CC(=Cc1ccc(c1O)[N+][O-])=O)C=O</chem>                 |
| <b>H3 (D12) <sup>i</sup></b> | 2-((5-chloro-1,2,3-thiadiazol-4-yl)-methoxy)-benzaldehyde                      |  | <chem>C(c1c(snn1)[Cl])Oc1ccccc1C=O</chem>                   |
| <b>H4</b>                    | 2-(9-formyl-8-methyl-7-azabicyclo[4.3.0]nona-1,3,5,8-tetraen-7-yl)-acetic acid |  | <chem>Cc1c(C=O)c2ccccc2n1CC(O)=O</chem>                     |
| <b>H5</b>                    | 2,5-dimethyl-1-(pyridin-4-yl)-1H-pyrrole-3-carbaldehyde                        |  | <chem>Cc1cc(C=O)c(C)n1c1ccncc1</chem>                       |
| <b>H6</b>                    | 4-formyl-2-iodo-6-methoxy-phenyl ethanoate                                     |  | <chem>CC(=O)Oc1c(cc(C=O)cc1)OC</chem>                       |
| <b>H7</b>                    | 2-dimethylamino-5-formyl-6-oxo-4-phenyl-6H-1,3-oxazine                         |  | <chem>CN(C)C1=NC(=C(C=O)C(=O)O1)c1ccccc1</chem>             |

|            |                                                                                     |                                                                                     |                                                     |
|------------|-------------------------------------------------------------------------------------|-------------------------------------------------------------------------------------|-----------------------------------------------------|
| <b>H8</b>  | 2-methoxy-4-(pyrrolidin-1-yl)-benzaldehyde                                          |    | <chem>COC1cc(ccc1C=O)N1CCCC1</chem>                 |
| <b>H9</b>  | 5-dimethylamino-7-methoxy-bicyclo[4.4.0]deca-1(6),2,4,7,9-pentaene-2-carbaldehyde   |    | <chem>CN(C)c1ccc(C=O)c2cccc(c12)OC</chem>           |
| <b>H10</b> | 1-methyl-5-(3-nitro-phenyl)-1H-pyrrole-2-carbaldehyde                               |    | <chem>Cn1c(C=O)ccc1c1cccc(c1)[N+][[O-]]=O</chem>    |
| <b>H11</b> | 7,9-dimethyl-4-nitro-8-oxo-7,9-diaza-bicyclo[4.3.0]nona-1,3,5-triene-3-carbaldehyde |    | <chem>CN1C(N(C)c2cc(c(C=O)cc12)[N+][[O-]])=O</chem> |
| <b>H12</b> | 10-ethoxy-2-aza-bicyclo[4.4.0]deca-1(6),2,4,7,9-pentaene-3-carbaldehyde             |    | <chem>CCOc1cccc2ccc(C=O)nc12</chem>                 |
| <b>I1</b>  | 7-methyl-4-thia-1,6-diaza-bicyclo[3.3.0]octa-2,5,7-triene-8-carbaldehyde            |    | <chem>Cc1c(C=O)n2ccsc2n1</chem>                     |
| <b>I2</b>  | 3-(1-benzyl-1H-1,2,3-triazol-4-yl)-acrylaldehyde                                    |    | <chem>C(c1cccc1)n1cc(C=CC=O)nn1</chem>              |
| <b>I3</b>  | 5-formyl-2,3-dimethylbenzo[d]thiazol-3-ium iodide                                   |   | <chem>Cc1[n+](C)c2cc(C=O)ccc2s1.[I-]</chem>         |
| <b>I4</b>  | 1-cyclopentyl-2,5-dimethyl-1H-pyrrole-3-carbaldehyde                                |  | <chem>Cc1cc(C=O)c(C)n1C1CCCC1</chem>                |
| <b>I5</b>  | 5-chloro-1-(2-chloro-phenyl)-3-methyl-1H-pyrazole-4-carbaldehyde                    |  | <chem>Cc1c(C=O)c(n(c2ccccc2[Cl])n1)[Cl]</chem>      |
| <b>I6</b>  | 3-(5-methyl-furan-2-yl)-1-phenyl-1H-pyrazole-4-carbaldehyde                         |  | <chem>Cc1ccc(c2c(C=O)cn(c3cccc3)n2)o1</chem>        |
| <b>I7</b>  | 1-((acetoxymino)methyl)-2-methylindolizine-3-carbaldehyde                           |  | <chem>CC(=O)ON=Cc1c(C)c(C=O)n2cccc12</chem>         |
| <b>I8</b>  | 5-oxo-1,2,4,5-tetrahydropyrrolo[1,2-a]quinazoline-3-carbaldehyde                    |  | <chem>C1CN2C(=C1C=O)NC(c1cccc12)=O</chem>           |
| <b>I9</b>  | 9-(4-methyl-benzyl)-10-oxo-1,8-diaza-bicyclo[5.3.0]dec-6-ene-6-carbaldehyde         |  | <chem>Cc1ccc(C=C2C(N3CCCC(C=O)=C3N2)=O)cc1</chem>   |

|            |                                                                                     |  |                                                    |
|------------|-------------------------------------------------------------------------------------|--|----------------------------------------------------|
| <b>I10</b> | 3-((4-chloro-phenyl)-formylamino)-benzaldehyde                                      |  | <chem>C(c1cccc(c1)NC(c1ccc(cc1)[Cl])=O)=O</chem>   |
| <b>I11</b> | 3-(7-formyl-8-methyl-1-azabicyclo[4.3.0]nona-2,4,6,8-tetraen-9-yl)-propanenitrile   |  | <chem>Cc1c(C=O)c2ccccc2c1CCC#N</chem>              |
| <b>I12</b> | 2-(5-formyl-2-methoxyphenoxy)-ethanenitrile                                         |  | <chem>COc1ccc(C=O)cc1OCC#N</chem>                  |
| <b>J1</b>  | bicyclo[2.2.1]hept-2-ene-5-carbaldehyde                                             |  | <chem>Cc1c(C(=O)OC)c2c(C=O)c(c(cc2o1)[Br])O</chem> |
| <b>J2</b>  | 9H-fluorene-2-carbaldehyde                                                          |  | <chem>C1c2ccccc2c2ccc(C=O)cc12</chem>              |
| <b>J3</b>  | 4-methyl-3-nitro-benzaldehyde                                                       |  | <chem>Cc1ccc(C=O)cc1[N+](=O)[O-]</chem>            |
| <b>J4</b>  | 5-methoxy-7-oxa-bicyclo[4.3.0]nona-1,3,5,8-tetraene-8-carbaldehyde                  |  | <chem>COc1cccc2cc(C=O)oc12</chem>                  |
| <b>J5</b>  | 3-(9-formyl-7-azabicyclo[4.3.0]nona-1,3,5,8-tetraen-7-yl)-propanenitrile            |  | <chem>C(Cn1cc(C=O)c2ccccc12)C#N</chem>             |
| <b>J6</b>  | 4-(phenyl-methoxy)-benzaldehyde                                                     |  | <chem>C(c1cccc1)Oc1ccc(C=O)cc1</chem>              |
| <b>J7</b>  | 3-amino-8-fluoro-5-oxo-2-oxa-bicyclo[4.4.0]deca-1(10),3,6,8-tetraene-4-carbaldehyde |  | <chem>C(C1=C(N)Oc2ccc(cc2C1=O)F)=O</chem>          |
| <b>J8</b>  | 1-((2,5-dioxabicyclo[4.4.0]deca-1(10),6,8-trien-3-yl)-methyl)-2,5-                  |  | <chem>Cc1cc(C=O)c(C)n1CC1COc2ccccc2O1</chem>       |
| <b>J9</b>  | 2-(acetyl-phenyl-amino)-thiazole-4-carbaldehyde                                     |  | <chem>CC(N(c1cccc1)c1nc(C=O)cs1)=O</chem>          |
| <b>J10</b> | 2-acetylamino-5-bromothiazole-4-carbaldehyde                                        |  | <chem>CC(Nc1nc(C=O)c(s1)[Br])=O</chem>             |
| <b>J11</b> | 5-(7-thia-9-azabicyclo[4.3.0]nona-1,3,5,8-tetraen-8-yl)-furan-2-                    |  | <chem>C(c1ccc(c2nc3ccccc3s2)o1)=O</chem>           |

|            |                                                                                 |                                                                                     |                                                           |
|------------|---------------------------------------------------------------------------------|-------------------------------------------------------------------------------------|-----------------------------------------------------------|
| <b>J12</b> | 8-(pyrrolidin-1-yl)-1,7-diazabicyclo[4.3.0]nona-2,4,6,8-tetraene-9-carbaldehyde | 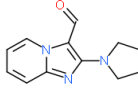   | <chem>C1CCN(C1)c1c(C=O)n2ccccc2n1</chem>                  |
| <b>K1</b>  | 5-(piperidin-1-yl)-furan-2-carbaldehyde                                         |    | <chem>C1CCN(CC1)c1ccc(C=O)o1</chem>                       |
| <b>K2</b>  | 2,5-dimethyl-1-(5-methylisoxazol-3-yl)-1H-pyrrole-3-carbaldehyde                |    | <chem>Cc1cc(C=O)c(C)n1c1cc(C)on1</chem>                   |
| <b>K3</b>  | 4-chloro-2-(4-methoxyphenylamino)-thiazole-5-carbaldehyde                       |    | <chem>COC1ccc(cc1)Nc1nc(c(C=O)s1)[Cl]</chem>              |
| <b>K4</b>  | 9-chloro-7-methyl-7-azabicyclo[4.3.0]nona-1,3,5,8-tetraene-8-carbaldehyde       |    | <chem>Cn1c(C=O)c(c2ccccc12)[Cl]</chem>                    |
| <b>K5</b>  | 8-nitro-2,4-dioxabicyclo[4.4.0]deca-1(10),6,8-triene-10-carbaldehyde            |    | <chem>C1c2cc(cc(C=O)c2OCO1)[N+](=[O-])=O</chem>           |
| <b>K6</b>  | 4-(1H-1,2,4-triazol-1-yl)-benzaldehyde                                          |    | <chem>C(c1ccc(cc1)n1cncn1)=O</chem>                       |
| <b>K7</b>  | 5-nitro-2-(4-phenylpiperazin-1-yl)-benzaldehyde                                 |   | <chem>C1CN(CCN1c1ccccc1)c1ccc(cc1C=O)[N+](=[O-])=O</chem> |
| <b>K8</b>  | 3-(2,2,2-trifluoroacetyl-amino)-benzaldehyde                                    |  | <chem>C(c1ccc(c1)NC(C(F)(F)F)=O)=O</chem>                 |
| <b>K9</b>  | 2-((1,5,7-triazabicyclo[4.3.0]nona-2,4,6,8-tetraen-8-yl)-methoxy)-              |  | <chem>C(c1cn2ccnc2n1)Oc1ccccc1C=O</chem>                  |
| <b>K10</b> | 3-(2,6-dioxabicyclo[5.4.0]undeca-1(11),7,9-trien-9-yl)-1-methyl-1H-             |  | <chem>Cn1cc(C=O)c(c2ccc3c(c2)OCCCO3)n1</chem>             |
| <b>K11</b> | 8-fluoro-2,4-dioxabicyclo[4.4.0]deca-1(10),6,8-triene-10-carbaldehyde           |  | <chem>C1c2cc(cc(C=O)c2OCO1)F</chem>                       |
| <b>K12</b> | 4-chloro-2-dimethylaminothiazole-5-carbaldehyde                                 |  | <chem>CN(C)c1nc(c(C=O)s1)[Cl]</chem>                      |
| <b>L1</b>  | 1-(2-chloro-benzyl)-1H-pyrazole-4-carbaldehyde                                  |  | <chem>C(c1ccccc1[Cl])n1cc(C=O)cn1</chem>                  |



|                         |                                                                                       |                                                                                     |                                                    |
|-------------------------|---------------------------------------------------------------------------------------|-------------------------------------------------------------------------------------|----------------------------------------------------|
| <b>L2</b>               | 3-(3-(3-bromo-phenyl)-4-formyl-1H-pyrazol-1-yl)-propanenitrile                        |    | <chem>C(Cn1cc(C=O)c(c2cccc(c2)[Br])n1)C#N</chem>   |
| <b>L3</b>               | 7-thia-bicyclo[4.3.0]nona-1,3,5,8-tetraene-9-carbaldehyde                             |    | <chem>C(c1csc2cccc12)=O</chem>                     |
| <b>L4</b>               | 9-nitro-2,5-dioxabicyclo[4.4.0]deca-1(10),6,8-triene-8-carbaldehyde                   |    | <chem>C1COc2cc(c(C=O)cc2O1)[N+](=[O-])=O</chem>    |
| <b>L5</b>               | 2-(7,9-diaza-bicyclo[4.3.0]nona-1,3,5,7-tetraen-8-yl)-2-methylsulfonyl-acetaldehyde   |    | <chem>CS(C(C=O)c1nc2cccc2[nH]1)(=O)=O</chem>       |
| <b>L6</b>               | 4-(5-formylfuran-2-yl)-N,N-dimethylbenzenesulfonamide                                 |    | <chem>CN(C)S(c1ccc(cc1)c1ccc(C=O)o1)(=O)=O</chem>  |
| <b>L7</b>               | 3-fluoro-4-(1H-1,2,4-triazol-1-yl)-benzaldehyde                                       |    | <chem>C(c1ccc(c(c1)F)n1cncn1)=O</chem>             |
| <b>L8</b>               | 3,5,7-trimethyl-9-thia-2,4-diazabicyclo[4.3.0]nona-1(6),2,4,7-tetraene-8-carbaldehyde |    | <chem>Cc1c2c(C)nc(C)nc2sc1C=O</chem>               |
| <b>L9</b>               | 8-methyl-2-(trifluoro-methyl)-1,5,9-triaza-bicyclo[4.3.0]nona-2,4,6,8-tetraene-7-     |  | <chem>Cc1c(C=O)c2nccc(C(F)(F)F)n2n1</chem>         |
| <b>L10</b>              | 3-chloro-7,9-dimethyl-2,8,9-triaza-bicyclo[4.3.0]nona-1,3,5,7-tetraene-4-             |  | <chem>Cc1c2cc(C=O)c(nc2n(C)n1)[Cl]</chem>          |
| <b>L11</b>              | 4-methoxy-7-methyl-2-oxo-1,5-diaza-bicyclo[4.4.0]deca-3,5,7,9-tetraene-3-             |  | <chem>CC1=CC=CN2C1=NC(=C(C=O)C2=O)OC</chem>        |
| <b>L12</b>              | 5-chloro-1-(2-chloro-benzyl)-3-methyl-1H-pyrazole-4-carbaldehyde                      |  | <chem>Cc1c(C=O)c(n(Cc2cccc2[Cl])n1)[Cl]</chem>     |
| <b>M1</b>               | 5-chloro-2-((pyridin-3-yl)-methoxy)-benzaldehyde                                      |  | <chem>C(c1cccnc1)Oc1ccc(cc1C=O)[Cl]</chem>         |
| <b>M2</b>               | 4-(2-methyl-morpholin-4-yl)-3-nitro-benzaldehyde                                      |  | <chem>CC1CN(CCO1)c1ccc(C=O)cc1[N+](=[O-])=O</chem> |
| <b>M3</b> <sup>ii</sup> | N/A                                                                                   | N/A                                                                                 | N/A                                                |

|                         |                                                                              |                                                                                     |                                                         |
|-------------------------|------------------------------------------------------------------------------|-------------------------------------------------------------------------------------|---------------------------------------------------------|
| <b>M4</b> <sup>ii</sup> | N/A                                                                          | N/A                                                                                 | N/A                                                     |
| <b>M5</b>               | 4-dimethylamino-benzaldehyde                                                 | 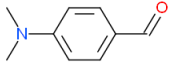   | <chem>CN(C)c1ccc(C=O)cc1</chem>                         |
| <b>M6</b>               | benzaldehyde                                                                 |    | <chem>C(c1ccccc1)=O</chem>                              |
| <b>M7</b>               | 7,9-dioxa-bicyclo[4.3.0]nona-1(6),2,4-triene-2-carbaldehyde                  |    | <chem>C1Oc2cccc(C=O)c2O1</chem>                         |
| <b>M8</b>               | 2-aza-bicyclo[4.4.0]deca-1(10),2,4,6,8-pentaene-4-carbaldehyde               |    | <chem>C(c1cc2ccccc2nc1)=O</chem>                        |
| <b>M9</b>               | 4,10-dimethoxy-bicyclo[4.4.0]deca-1,3,5,7,9-pentaene-7-carbaldehyde          |    | <chem>COC1ccc2c(ccc(C=O)c2c1)OC</chem>                  |
| <b>M10</b>              | 4-phenyl-benzaldehyde                                                        |    | <chem>C(c1ccc(cc1)c1ccccc1)=O</chem>                    |
| <b>M11</b>              | 4-(2-oxo-2-(2-oxo-imidazolidin-1-yl)-ethoxy)-benzaldehyde                    |   | <chem>C1CN(C(COc2ccc(C=O)cc2)=O)C(N1)=O</chem>          |
| <b>M12</b>              | 8-methoxy-bicyclo[4.4.0]deca-1,3,5,7,9-pentaene-7-carbaldehyde               |  | <chem>COC1ccc2ccccc2c1C=O</chem>                        |
| <b>N1</b>               | 8-hydroxy-3-nitro-bicyclo[4.4.0]deca-1,3,5,7,9-pentaene-7-carbaldehyde       |  | <chem>C(c1c(ccc2cc(ccc12)[N+](=[O-])=O)O)=O</chem>      |
| <b>N2</b>               | 2-(7-oxa-9-aza-bicyclo[4.3.0]nona-1,3,5,8-tetraen-8-yl)-3-oxo-               |  | <chem>C(C#N)c1nc2ccccc2o1)=O</chem>                     |
| <b>N3</b>               | 8-(2-dimethylamino-vinyl)-7-methyl-3-nitro-7-aza-bicyclo[4.3.0]nona-1,3,5,8- |  | <chem>CN(C)C=Cc1c(C=O)c2cc(ccc2n1C)[N+](=[O-])=O</chem> |
| <b>N4</b>               | 4-((2,5-dioxo-imidazolidin-4-ylidene)-methyl)-benzaldehyde                   |  | <chem>C(=C1C(NC(N1)=O)=O)c1ccc(C=O)cc1</chem>           |
| <b>N5</b>               | 10-hydroxy-2-aza-bicyclo[4.4.0]deca-1(10),2,4,6,8-pentaene-7-carbaldehyde    |  | <chem>C(c1ccc(c2c1cccn2)O)=O</chem>                     |

|            |                                                                                |  |                                                      |
|------------|--------------------------------------------------------------------------------|--|------------------------------------------------------|
| <b>N6</b>  | 4-fluoro-3-methoxy-benzaldehyde                                                |  | <chem>COc1cc(C=O)ccc1F</chem>                        |
| <b>N7</b>  | 2-fluoro-5-(trifluoro-methyl)-benzaldehyde                                     |  | <chem>C(c1cc(ccc1F)C(F)(F)F)=O</chem>                |
| <b>N8</b>  | 3-hydroxy-4-iodo-benzaldehyde                                                  |  | <chem>C(c1ccc(c(c1)O)I)=O</chem>                     |
| <b>N9</b>  | 9-thia-2-aza-bicyclo[4.3.0]nona-1(6),2,4,7-tetraene-8-carbaldehyde             |  | <chem>C(c1cc2cccnc2s1)=O</chem>                      |
| <b>N10</b> | 2,4-dimethyl-thiazole-5-carbaldehyde                                           |  | <chem>Cc1c(C=O)sc(C)n1</chem>                        |
| <b>N11</b> | 5-(thiophen-2-yl)-thiophene-2-carbaldehyde                                     |  | <chem>C(c1ccc(c2cccs2)s1)=O</chem>                   |
| <b>N12</b> | 1,3-dimethyl-5-(morpholin-4-yl)-1H-pyrazole-4-carbaldehyde                     |  | <chem>Cc1c(C=O)c(N2CCOCC2)n(C)n1</chem>              |
| <b>O1</b>  | 3-(1H-pyrrol-1-yl)-benzaldehyde                                                |  | <chem>C(c1cccc(c1)n1cccc1)=O</chem>                  |
| <b>O2</b>  | 3-(1H-pyrrol-1-yl)-thiophene-2-carbaldehyde                                    |  | <chem>C(c1c(ccs1)n1cccc1)=O</chem>                   |
| <b>O3</b>  | 1,1-dimethyl-ethyl 4-(5-formyl-4-methyl-thiazol-2-yl)-piperidine-1-carboxylate |  | <chem>Cc1c(C=O)sc(C2CCN(CC2)C(=O)OC(C)(C)C)n1</chem> |
| <b>O4</b>  | 1,1-dimethyl-ethyl 4-formyl-3,5-dimethyl-1H-pyrazole-1-carboxylate             |  | <chem>Cc1c(C=O)c(C)n(C(=O)OC(C)(C)C)n1</chem>        |
| <b>O5</b>  | 3-(morpholin-4-yl)-benzaldehyde                                                |  | <chem>C1COCCN1c1cccc(C=O)c1</chem>                   |
| <b>O6</b>  | 6-(piperidin-1-yl)-pyridine-2-carbaldehyde                                     |  | <chem>C1CCN(CC1)c1cccc(C=O)n1</chem>                 |
| <b>O7</b>  | 7-methyl-7-aza-bicyclo[4.3.0]nona-1,3,5,8-tetraene-4-carbaldehyde              |  | <chem>Cn1ccc2ccc(C=O)cc12</chem>                     |

|                            |                                                                            |                                                                                     |                                                  |
|----------------------------|----------------------------------------------------------------------------|-------------------------------------------------------------------------------------|--------------------------------------------------|
| <b>O8</b>                  | 4-((piperidin-1-yl)-methyl)-benzaldehyde                                   |    | <chem>C1CCN(CC1)Cc1ccc(C=O)cc1</chem>            |
| <b>O9</b>                  | 1-methyl-5-phenyl-1H-pyrazole-3-carbaldehyde                               |    | <chem>Cn1c(cc(C=O)n1)c1ccccc1</chem>             |
| <b>O10</b>                 | 2-(3-chloro-phenyl)-thiazole-4-carbaldehyde                                |    | <chem>C(c1csc(c2cccc(c2)[Cl])n1)=O</chem>        |
| <b>O11</b>                 | 4-(3-methyl-1,2,4-oxadiazol-5-yl)-benzaldehyde                             |    | <chem>Cc1nc(c2ccc(C=O)cc2)on1</chem>             |
| <b>O12</b>                 | 6-(thiophen-2-yl)-pyridine-3-carbaldehyde                                  |    | <chem>C(c1ccc(c2cccs2)nc1)=O</chem>              |
| <b>P1</b>                  | 1-(6-methyl-pyrazin-2-yl)-piperidine-4-carbaldehyde                        |    | <chem>Cc1cncc(n1)N1CCC(CC1)C=O</chem>            |
| <b>P2</b>                  | 5-methyl-2-oxa-5,7-diazabicyclo[4.4.0]deca-1(10),6,8-triene-9-carbaldehyde |    | <chem>CN1CCOc2cc(C=O)cnc12</chem>                |
| <b>P3</b>                  | 4-(6-methyl-pyrazin-2-yloxy)-benzaldehyde                                  |   | <chem>Cc1cncc(n1)Oc1ccc(C=O)cc1</chem>           |
| <b>P4</b>                  | 3-phenyl-isoxazole-5-carbaldehyde                                          |  | <chem>C(c1cc(c2ccccc2)no1)=O</chem>              |
| <b>P5 (G8)<sup>i</sup></b> | 5-(9-methyl-7,9-diazabicyclo[4.3.0]nona-1,3,5,7-tetraen-8-yl)-thiophene-2- |  | <chem>Cn1c2ccccc2nc1c1ccc(C=O)s1</chem>          |
| <b>P6</b>                  | 3-dimethylamino-2-(2-nitro-phenyl)-acrylaldehyde                           |  | <chem>CN(C)C=C(C=O)c1ccccc1[N+](=O)[O-]=O</chem> |
| <b>P7</b>                  | 4,6-dimethyl-2,8-dithiabicyclo[3.3.0]octa-1(5),3,6-triene-3-carbaldehyde   |  | <chem>Cc1csc2c1c(C)c(C=O)s2</chem>               |
| <b>P8</b>                  | 3-phenoxy-thiophene-2-carbaldehyde                                         |  | <chem>C(c1c(ccs1)Oc1ccccc1)=O</chem>             |
| <b>P9</b>                  | 5-((7,9-dioxo-8-aza-bicyclo[4.3.0]nona-1,3,5-trien-8-yl)-methyl)-furan-2-  |  | <chem>C(c1ccc(C=O)o1)N1C(c2ccccc2C1=O)=O</chem>  |

|                             |                                                                              |                                                                                     |                                                 |
|-----------------------------|------------------------------------------------------------------------------|-------------------------------------------------------------------------------------|-------------------------------------------------|
| <b>P10</b>                  | 3-(2-formyl-1H-pyrrol-1-yl)-benzonitrile                                     |    | <chem>C(c1cccn1c1cccc(C#N)c1)=O</chem>          |
| <b>P11</b>                  | 2-fluoro-5-formyl-benzoic acid                                               |    | <chem>C(c1ccc(c(c1)C(O)=O)F)=O</chem>           |
| <b>P12</b>                  | 6-amino-1,3-dimethyl-2,4-dioxo-1,2,3,4-tetrahydropyrimidine-5-carbaldehyde   |    | <chem>CN1C(=C(C=O)C(N(C)C1=O)=O)N</chem>        |
| <b>Q1</b>                   | 3-chloro-thiophene-2-carbaldehyde                                            |    | <chem>C(c1c(ccs1)[Cl])=O</chem>                 |
| <b>Q2</b>                   | 6-formyl-2-methylsulfonyl-pyridine-3-carbonitrile                            |    | <chem>CSc1c(C#N)ccc(C=O)n1</chem>               |
| <b>Q3</b>                   | 2-chloro-4-methylsulfonyl-benzaldehyde                                       |    | <chem>CS(c1ccc(C=O)c(c1)[Cl])(=O)=O</chem>      |
| <b>Q4 (G6) <sup>i</sup></b> | 9-methyl-4-nitro-7,9-diazabicyclo[4.3.0]nona-1,3,5,7-tetraene-8-carbaldehyde |    | <chem>C1c2ccccc2c2ccc(C=O)cc12</chem>           |
| <b>Q5</b>                   | 2,5-dihydroxy-benzaldehyde                                                   |  | <chem>C(c1cc(ccc1O)O)=O</chem>                  |
| <b>Q6</b>                   | 2-fluoro-5-formyl-benzonitrile                                               |  | <chem>C(c1ccc(c(C#N)c1)F)=O</chem>              |
| <b>Q7</b>                   | 3-vinyl-benzaldehyde                                                         |  | <chem>C=Cc1cccc(C=O)c1</chem>                   |
| <b>Q8</b>                   | 2-fluoro-6-methoxy-benzaldehyde                                              |  | <chem>COc1cccc(c1C=O)F</chem>                   |
| <b>Q9</b>                   | 5,8-dichloro-4-formyl-3-oxo-2-oxa-bicyclo[4.4.0]deca-1(10),4,6,8-tetraene    |  | <chem>C(C1=C(c2cc(ccc2OC1=O)[Cl])[Cl])=O</chem> |
| <b>Q10</b>                  | 3,5-dichloro-pyridine-4-carbaldehyde                                         |  | <chem>C(c1c(cnc1[Cl])[Cl])=O</chem>             |
| <b>Q11</b>                  | 3-(7-methyl-7-aza-bicyclo[4.3.0]nona-1,3,5,8-tetraen-9-yl)-butanal           |  | <chem>[H][C@](C)(CC=O)c1cn(C)c2ccccc12</chem>   |

|                             |                                                                       |                                                                                     |                                                |
|-----------------------------|-----------------------------------------------------------------------|-------------------------------------------------------------------------------------|------------------------------------------------|
| <b>Q12</b>                  | 5-(4-fluoro-phenyl)-isoxazole-3-carbaldehyde                          | 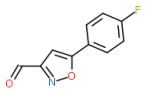   | <chem>C(c1cc(c2ccc(cc2)F)on1)=O</chem>         |
| <b>R1</b>                   | methyl 4-(6-formyl-pyridin-2-yl)-benzoate                             |    | <chem>COC(c1ccc(cc1)c1cccc(C=O)n1)=O</chem>    |
| <b>R2</b>                   | 2-methoxy-4-nitro-benzaldehyde                                        |    | <chem>COC1cc(ccc1C=O)[N+](=[O-])=O</chem>      |
| <b>R3</b>                   | 4-bromo-2-methoxy-benzaldehyde                                        |    | <chem>COC1cc(ccc1C=O)[Br]</chem>               |
| <b>R4</b>                   | 4,5-dimethyl-thiophene-2-carbaldehyde                                 |    | <chem>Cc1cc(C=O)sc1C</chem>                    |
| <b>R5</b>                   | 6-bromo-2,3-dimethoxy-benzaldehyde                                    |    | <chem>COC1ccc(c(C=O)c1OC)[Br]</chem>           |
| <b>R6</b>                   | 2-hydroxy-5-methoxy-3-((morpholin-4-yl)-methyl)-benzaldehyde          |    | <chem>COC1cc(CN2CCOCC2)c(c(C=O)c1)O</chem>     |
| <b>R7</b>                   | 8-chloro-4-formyl-3,5-dioxo-2-oxa-bicyclo[4.4.0]deca-1(10),6,8-triene |   | <chem>C(C1C(c2cc(ccc2OC1=O)[Cl])=O)=O</chem>   |
| <b>R8</b>                   | 2-chloro-6-phenyl-pyridine-4-carbaldehyde                             |  | <chem>C(c1cc(c2ccccc2)nc(c1)[Cl])=O</chem>     |
| <b>R9</b>                   | 5-(4-chloro-phenylsulfonyl)-furan-2-carbaldehyde                      |  | <chem>C(c1ccc(o1)S(c1ccc(cc1)[Cl])=O)=O</chem> |
| <b>R10 (I7)<sup>i</sup></b> | 1-((acetoxymino)methyl)-2-methylindolizine-3-carbaldehyde             |  | <chem>CC(=O)ON=Cc1c(C)c(C=O)n2ccccc12</chem>   |
| <b>R11</b>                  | 5-(thiocyanato-methyl)-furan-2-carbaldehyde                           |  | <chem>C(c1ccc(C=O)o1)SC#N</chem>               |
| <b>R12</b>                  | Phenanthrene-9-carboxaldehyde                                         |  | <chem>C(c1cc2ccccc2c2ccccc12)=O</chem>         |
| <b>S1</b>                   | methyl 3-formyl-2-hydroxy-benzoate                                    |  | <chem>COC(c1ccc(C=O)c1O)=O</chem>              |

|            |                                                                                      |                                                                                     |                                                      |
|------------|--------------------------------------------------------------------------------------|-------------------------------------------------------------------------------------|------------------------------------------------------|
| <b>S2</b>  | 4,5-dibromo-furan-2-carbaldehyde                                                     | 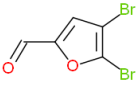   | <chem>C(c1cc(c(o1)[Br])[Br])=O</chem>                |
| <b>S3</b>  | 3-iodo-4,5-dimethoxy-benzaldehyde                                                    |    | <chem>COC1cc(C=O)cc(c1OC)I</chem>                    |
| <b>S4</b>  | 2-aza-bicyclo[4.4.0]deca-1(6),2,4,7,9-pentaene-10-carbaldehyde                       |    | <chem>C(c1cccc2cccnc12)=O</chem>                     |
| <b>S5</b>  | 5-chloro-2-hydroxy-3-methoxy-benzaldehyde                                            |    | <chem>COC1cc(cc(C=O)c1O)[Cl]</chem>                  |
| <b>S6</b>  | 4-((1,1-dioxidobenzo[d]isothiazol-3-yl)oxy)benzaldehyde                              |    | <chem>C(c1ccc(cc1)OC1c2ccccc2S(N=1)(=O)=O)=O</chem>  |
| <b>S7</b>  | N-(3-formylphenyl)methanesulfonamide                                                 |    | <chem>CS(Nc1cccc(C=O)c1)(=O)=O</chem>                |
| <b>S8</b>  | methyl 4-formyl-benzoate                                                             |    | <chem>COC(c1ccc(C=O)cc1)=O</chem>                    |
| <b>S9</b>  | 2-phenyl-acetaldehyde                                                                |  | <chem>C(C=O)c1ccccc1</chem>                          |
| <b>S10</b> | 4-methoxy-3-((1H-pyrazol-1-yl)methyl)-benzaldehyde                                   |  | <chem>COC1ccc(C=O)cc1Cn1cccn1</chem>                 |
| <b>S11</b> | 4-ethynyl-benzaldehyde                                                               |  | <chem>C#Cc1ccc(C=O)cc1</chem>                        |
| <b>S12</b> | -ethyl 2-chloro-3-formyl-9-methyl-7-aza-bicyclo[4.3.0]nona-1(6),2,8-                 |  | <chem>CCOC(c1c(C)c2C(=C(CCC2[nH]1)C=O)[Cl])=O</chem> |
| <b>T1</b>  | 8-(2-formyl-1H-pyrrol-1-yl)-7-thia-bicyclo[4.3.0]nona-1(6),8-diene-9-carboxylic acid |  | <chem>C1CCc2c(C1)c(C(O)=O)c(n1cccc1C=O)s2</chem>     |
| <b>T2</b>  | 7-aza-bicyclo[4.3.0]nona-1,3,5,8-tetraene-2-carbaldehyde                             |  | <chem>C(c1cccc2c1cc[nH]2)=O</chem>                   |
| <b>T3</b>  | 5-formyl-4-hydroxy-bicyclo[4.4.0]deca-1,3,5,7,9-pentaene-3-carboxylic acid           |  | <chem>C(c1c(cc2ccccc12)C(O)=O)O=O</chem>             |

|                                 |                                                              |                                                                                     |                                             |
|---------------------------------|--------------------------------------------------------------|-------------------------------------------------------------------------------------|---------------------------------------------|
| <b>T4</b>                       | 4-(prop-2-ynoxy)-benzaldehyde                                | 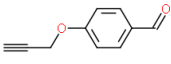   | <chem>C#CCOc1ccc(C=O)cc1</chem>             |
| <b>T5</b>                       | 4-chloro-2-methyl-2H-pyrazole-3-carbaldehyde                 |    | <chem>Cn1c(C=O)c(c[n1])[Cl]</chem>          |
| <b>T6</b>                       | 7-aza-bicyclo[4.3.0]nona-1,3,5,8-tetraene-3-carbaldehyde     |    | <chem>C(c1ccc2c(cc[nH]2)c1)=O</chem>        |
| <b>T7</b>                       | methyl 2-formyl-benzoate                                     |    | <chem>COC(c1cccc1C=O)=O</chem>              |
| <b>T8</b>                       | 5-((2,3,5,6-tetrafluorophenoxy)-methyl)-furan-2-carbaldehyde |    | <chem>C(c1ccc(C=O)o1)Oc1c(c(cc1F)F)F</chem> |
| <b>T9</b>                       | 2-(4-bromo-2-formyl-phenoxy)-ethanenitrile                   |    | <chem>C(C#N)Oc1ccc(cc1C=O)[Br]</chem>       |
| <b>T10</b>                      | 1-(2-hydroxy-phenyl)-ethanone                                |    | <chem>CC(c1cccc1O)=O</chem>                 |
| <b>T11</b>                      | 1-(4-hydroxy-phenyl)-ethanone                                |  | <chem>CC(c1ccc(cc1)O)=O</chem>              |
| <b>T12 (H1, D1)<sup>i</sup></b> | 6-(4-formyl-phenyl)-pyridine-3-carbonitrile                  |  | <chem>C(c1ccc(cc1)c1ccc(C#N)cn1)=O</chem>   |

<sup>i</sup>Repeat aldehydes. <sup>ii</sup>Blank spaces.



**Table S2.** Inhibition values of oximes **5-Y** determined in gel-based TDP1 binding assays.<sup>i</sup> 16

Oximes (red) show >90% TDP1 inhibition at 100  $\mu$ M, Hit/Library = 16/230 = 7%.

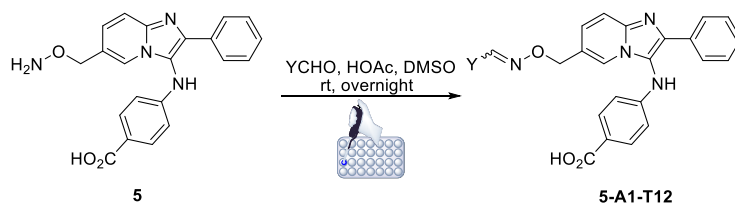

|          | 1              | 2           | 3                      | 4                     | 5           | 6           | 7           | 8           | 9           | 10           | 11           | 12           |
|----------|----------------|-------------|------------------------|-----------------------|-------------|-------------|-------------|-------------|-------------|--------------|--------------|--------------|
| <b>A</b> | <b>5-A1</b>    | <b>5-A2</b> | <b>5-A3</b>            | <b>5-A4</b>           | <b>5-A5</b> | <b>5-A6</b> | <b>5-A7</b> | <b>5-A8</b> | <b>5-A9</b> | <b>5-A10</b> | <b>5-A11</b> | <b>5-A12</b> |
| %        | 22.7           | 27.4        | 48.3                   | 54.6                  | 49.0        | 2.5         | 14.0        | 54.6        | 6.5         | 35.4         | 10.6         | 42.6         |
| <b>B</b> | <b>5-B1</b>    | <b>5-B2</b> | <b>5-B3</b>            | <b>5-B4</b>           | <b>5-B5</b> | <b>5-B6</b> | <b>5-B7</b> | <b>5-B8</b> | <b>5-B9</b> | <b>5-B10</b> | <b>5-B11</b> | <b>5-B12</b> |
| %        | 25.1           | 12.9        | 14.6                   | -2.0                  | 63.2        | 19.4        | 45.5        | 36.9        | 73.5        | 22.2         | 77.8         | 7.9          |
| <b>C</b> | <b>5-C1</b>    | <b>5-C2</b> | <b>5-C3</b>            | <b>5-C4</b>           | <b>5-C5</b> | <b>5-C6</b> | <b>5-C7</b> | <b>5-C8</b> | <b>5-C9</b> | <b>5-C10</b> | <b>5-C11</b> | <b>5-C12</b> |
| %        | 1.3            | 3.1         | 12.9                   | 48.6                  | -1.5        | -0.5        | 51.5        | 47.9        | 32.2        | -16.8        | 11.2         | 47.5         |
| <b>D</b> | <b>5-D1</b>    | <b>5-D2</b> | <b>5-D3</b>            | <b>5-D4</b>           | <b>5-D5</b> | <b>5-D6</b> | <b>5-D7</b> | <b>5-D8</b> | <b>5-D9</b> | <b>5-D10</b> | <b>5-D11</b> | <b>5</b>     |
| %        | 93.9           | 52.1        | 77.8                   | 79.7                  | 71.9        | 49.7        | -6.3        | -2.3        | 58.8        | -25.1        | 13.8         | -5.3         |
| <b>E</b> | <b>5-E1</b>    | <b>5-E2</b> | Blank <sup>iii</sup>   | <b>5<sup>ii</sup></b> | <b>5-E5</b> | <b>5-E6</b> | <b>5-E7</b> | <b>5-E8</b> | <b>5-E9</b> | <b>5-E10</b> | <b>5-E11</b> | <b>5-E12</b> |
| %        | 23.9           | 14.5        | 0.0                    | 3.1                   | 13.9        | 45.6        | 21.0        | -10.6       | 11.4        | 21.8         | -2.6         | 15.6         |
| <b>F</b> | <b>5-F1</b>    | <b>5-F2</b> | <b>5-F3</b>            | <b>5-F4</b>           | <b>5-F5</b> | <b>5-F6</b> | <b>5-F7</b> | <b>5-F8</b> | <b>5-F9</b> | <b>5-F10</b> | <b>5-F11</b> | <b>5-F12</b> |
| %        | 1.4            | 41.6        | 10.1                   | 45.6                  | 98.2        | 34.0        | 5.5         | 45.4        | -8.2        | 61.5         | -3.6         | 25.1         |
| <b>G</b> | <b>5-G1</b>    | <b>5-G2</b> | <b>5-G3</b>            | <b>5-G4</b>           | <b>5-G5</b> | <b>5-G6</b> | <b>5-G7</b> | <b>5-G8</b> | <b>5-G9</b> | <b>5-G10</b> | <b>5-G11</b> | <b>5-G12</b> |
| %        | 20.0           | -10.6       | 65.4                   | 34.0                  | 57.6        | 93.1        | 106.5       | 90.5        | 34.2        | 0.7          | 4.4          | 24.1         |
| <b>H</b> | <b>5-H1/D1</b> | <b>5-H2</b> | <b>5-H3</b>            | <b>5-H4</b>           | <b>5-H5</b> | <b>5-H6</b> | <b>5-H7</b> | <b>5-H8</b> | <b>5-H9</b> | <b>5-H10</b> | <b>5-H11</b> | <b>5-H12</b> |
| %        | 81.0           | 76.7        | 33.9                   | -4.6                  | 16.0        | 3.5         | 1.3         | 35.6        | 4.5         | 35.2         | 26.7         | -20.6        |
| <b>I</b> | <b>5-I1</b>    | <b>5-I2</b> | <b>5-I3</b>            | <b>5-I4</b>           | <b>5-I5</b> | <b>5-I6</b> | <b>5-I7</b> | <b>5-I8</b> | <b>5-I9</b> | <b>5-I10</b> | <b>5-I11</b> | <b>5-I12</b> |
| %        | 15.2           | 5.2         | 44.5                   | 16.8                  | 46.4        | 58.9        | 98.3        | 29.7        | 16.4        | 0.2          | -16.5        | -2.5         |
| <b>J</b> | <b>5-J1</b>    | <b>5-J2</b> | <b>5-J3</b>            | <b>5-J4</b>           | <b>5-J5</b> | <b>5-J6</b> | <b>5-J7</b> | <b>5-J8</b> | <b>5-J9</b> | <b>5-J10</b> | <b>5-J11</b> | <b>5-J12</b> |
| %        | 3.2            | 82.5        | 25.8                   | -3.6                  | 12.0        | 40.3        | 2.6         | 37.9        | -17.8       | 30.8         | 24.0         | -2.8         |
| <b>K</b> | <b>5-K1</b>    | <b>5-K2</b> | <b>5-K3</b>            | <b>5-K4</b>           | <b>5-K5</b> | <b>5-K6</b> | <b>5-K7</b> | <b>5-K8</b> | <b>5-K9</b> | <b>5-K10</b> | <b>5-K11</b> | <b>5-K12</b> |
| %        | 0.5            | 10.8        | 35.1                   | 32.3                  | -1.5        | 20.9        | 2.0         | 39.9        | 9.7         | 9.7          | -6.7         | 6.6          |
| <b>L</b> | <b>5-L1</b>    | <b>5-L2</b> | <b>5-L3</b>            | <b>5-L4</b>           | <b>5-L5</b> | <b>5-L6</b> | <b>5-L7</b> | <b>5-L8</b> | <b>5-L9</b> | <b>5-L10</b> | <b>5-L11</b> | <b>5-L12</b> |
| %        | 14.6           | 4.7         | 0.4                    | -1.1                  | 5.5         | 47.7        | -6.2        | 0.3         | -28.5       | 22.5         | -19.0        | -17.1        |
| <b>M</b> | <b>5-M1</b>    | <b>5-M2</b> | <b>5<sup>iii</sup></b> | Blank <sup>ii</sup>   | <b>5-M5</b> | <b>5-M6</b> | <b>5-M7</b> | <b>5-M8</b> | <b>5-M9</b> | <b>5-M10</b> | <b>5-M11</b> | <b>5-M12</b> |
| %        | 11.9           | -6.5        | 4.2                    | 0.0                   | 62.9        | 0.1         | 20.1        | -0.1        | -4.5        | -2.8         | 112.9        | -23.6        |
| <b>N</b> | <b>5-N1</b>    | <b>5-N2</b> | <b>5-N3</b>            | <b>5-N4</b>           | <b>5-N5</b> | <b>5-N6</b> | <b>5-N7</b> | <b>5-N8</b> | <b>5-N9</b> | <b>5-N10</b> | <b>5-N11</b> | <b>5-N12</b> |
| %        | 84.6           | -13.1       | 98.5                   | 102.7                 | 25.6        | -13.6       | -3.2        | 87.6        | 29.5        | -10.9        | 24.4         | -10.1        |

|          |             |             |             |                |                |             |             |             |             |                 |              |                    |
|----------|-------------|-------------|-------------|----------------|----------------|-------------|-------------|-------------|-------------|-----------------|--------------|--------------------|
| <b>O</b> | <b>5-O1</b> | <b>5-O2</b> | <b>5-O3</b> | <b>5-O4</b>    | <b>5-O5</b>    | <b>5-O6</b> | <b>5-O7</b> | <b>5-O8</b> | <b>5-O9</b> | <b>5-O10</b>    | <b>5-O11</b> | <b>5-O12</b>       |
| %        | -4.2        | -6.2        | 1.6         | -3.6           | 72.1           | 2.9         | 20.6        | 8.7         | 6.7         | 6.5             | 113.0        | -9.4               |
| <b>P</b> | <b>5-P1</b> | <b>5-P2</b> | <b>5-P3</b> | <b>5-P4</b>    | <b>5-P5/G8</b> | <b>5-P6</b> | <b>5-P7</b> | <b>5-P8</b> | <b>5-P9</b> | <b>5-P10</b>    | <b>5-P11</b> | <b>5-P12</b>       |
| %        | 95.4        | 3.0         | 110.6       | 113.2          | 36.5           | -0.4        | 12.2        | 93.3        | 35.1        | -3.2            | 27.0         | -4.9               |
| <b>Q</b> | <b>5-Q1</b> | <b>5-Q2</b> | <b>5-Q3</b> | <b>5-Q4/G6</b> | <b>5-Q5</b>    | <b>5-Q6</b> | <b>5-Q7</b> | <b>5-Q8</b> | <b>5-Q9</b> | <b>5-Q10</b>    | <b>5-Q11</b> | <b>5-Q12</b>       |
| %        | 49.1        | 64.8        | 49.0        | 85.3           | 61.2           | 27.7        | 8.2         | 13.0        | 12.7        | 57.8            | 53.0         | -5.3               |
| <b>R</b> | <b>5-R1</b> | <b>5-R2</b> | <b>5-R3</b> | <b>5-R4</b>    | <b>5-R5</b>    | <b>5-R6</b> | <b>5-R7</b> | <b>5-R8</b> | <b>5-R9</b> | <b>5-R10/I7</b> | <b>5-R11</b> | <b>5-R12</b>       |
| %        | 42.2        | 64.4        | 35.5        | 17.2           | 45.5           | 9.9         | 18.4        | 29.9        | 32.3        | 101.3           | 91.2         | 38.4               |
| <b>S</b> | <b>5-S1</b> | <b>5-S2</b> | <b>5-S3</b> | <b>5-S4</b>    | <b>5-S5</b>    | <b>5-S6</b> | <b>5-S7</b> | <b>5-S8</b> | <b>5-S9</b> | <b>5-S10</b>    | <b>5-S11</b> | <b>5-S12</b>       |
| %        | 70.5        | 37.0        | 33.7        | 94.9           | 76.5           | 14.5        | 7.1         | 28.7        | 22.9        | 15.8            | 51.3         | 115.8              |
| <b>T</b> | <b>5-T1</b> | <b>5-T2</b> | <b>5-T3</b> | <b>5-T4</b>    | <b>5-T5</b>    | <b>5-T6</b> | <b>5-T7</b> | <b>5-T8</b> | <b>5-T9</b> | <b>5-T10</b>    | <b>5-T11</b> | <b>5-T12/D1/H1</b> |
| %        | 73.6        | 39.7        | 50.5        | 30.1           | 17.2           | 37.6        | 30.2        | 20.7        | 34.3        | 3.2             | 29.1         | 118.2              |

Notes: <sup>i</sup>See Figure S1. The oximes were evaluated by gel-based TDP1 fluorescence assay in a concentration of 100  $\mu$ M in DMSO. The fluorescence of DMSO blank vial was set as 0 and the fluorescence for the reference without TDP1 was set as 100%. Oximes **5-M1-T12** (30  $\mu$ L, 10 mM in DMSO). Preparation: A mixture of aminoxy-containing **5** (10  $\mu$ L, 30 mM in DMSO), aldehydes **M1-T12** (10  $\mu$ L, 30 mM in DMSO) and acetic acid (10  $\mu$ L, 150 mM in DMSO) were agitated at room temperature overnight. Oximes **5-M1-T12** (30  $\mu$ L, 10 mM in DMSO) were afforded. <sup>ii</sup>Aminoxy-containing **5** (10 mM) and HOAc (50 mM). <sup>iii</sup>Blank: HOAc (50 mM in DMSO).

**Table S3.** Inhibition values of oximes **6-Y** determined in gel-based TDP1 binding assays.<sup>i</sup> 42

Oximes (red) show >90% TDP1 inhibition at 100  $\mu$ M, Hit/Library = 42/230 = 18%.

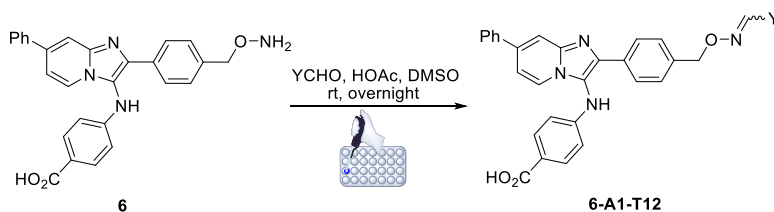

|          | 1              | 2           | 3                          | 4                          | 5           | 6           | 7           | 8           | 9           | 10           | 11           | 12                     |
|----------|----------------|-------------|----------------------------|----------------------------|-------------|-------------|-------------|-------------|-------------|--------------|--------------|------------------------|
| <b>A</b> | <b>6-A1</b>    | <b>6-A2</b> | <b>6-A3</b>                | <b>BLANK<sup>#</sup></b>   | <b>6-A5</b> | <b>6-A6</b> | <b>6-A7</b> | <b>6-A8</b> | <b>6-A9</b> | <b>6-A10</b> | <b>6-A11</b> | <b>6-A12</b>           |
| %        | 37.9           | 24.0        | 26.4                       | 0.0                        | 11.7        | 96.6        | 30.1        | 73.0        | 17.9        | 63.4         | 87.1         | 26.5                   |
| <b>B</b> | <b>6-B1</b>    | <b>6-B2</b> | <b>6-B3</b>                | <b>6-B4</b>                | <b>6-B5</b> | <b>6-B6</b> | <b>6-B7</b> | <b>6-B8</b> | <b>6-B9</b> | <b>6-B10</b> | <b>6-B11</b> | <b>6-B12</b>           |
| %        | 35.5           | 77.5        | 57.1                       | 81.1                       | 81.3        | 26.0        | 90.7        | 17.9        | 98.2        | 24.3         | 90.8         | 64.5                   |
| <b>C</b> | <b>6-C1</b>    | <b>6-C2</b> | <b>6-C3</b>                | <b>6-C4</b>                | <b>6-C5</b> | <b>6-C6</b> | <b>6-C7</b> | <b>6-C8</b> | <b>6-C9</b> | <b>6-C10</b> | <b>6-C11</b> | <b>6-C12</b>           |
| %        | 83.2           | 54.7        | 67.4                       | 54.2                       | 37.3        | 57.4        | 25.6        | 51.1        | 53.1        | 26.0         | 68.4         | 34.7                   |
| <b>D</b> | <b>6-D1</b>    | <b>6-D2</b> | <b>6-D3</b>                | <b>6-D4</b>                | <b>6-D5</b> | <b>6-D6</b> | <b>6-D7</b> | <b>6-D8</b> | <b>6-D9</b> | <b>6-D10</b> | <b>6-D11</b> | <b>6<sup>iii</sup></b> |
| %        | 98.7           | 43.7        | 37.6                       | 79.6                       | 30.9        | 75.6        | 17.7        | 61.6        | 17.3        | 97.7         | 82.7         | 34.5                   |
| <b>E</b> | <b>6-E1</b>    | <b>6-E2</b> | <b>Blank<sup>iii</sup></b> | <b>6<sup>#</sup></b>       | <b>6-E5</b> | <b>6-E6</b> | <b>6-E7</b> | <b>6-E8</b> | <b>6-E9</b> | <b>6-E10</b> | <b>6-E11</b> | <b>6-E12</b>           |
| %        | 46.1           | 50.6        | 0.0                        | 44.8                       | 39.1        | 102.1       | 87.4        | 60.3        | 35.5        | 86.0         | 37.7         | 45.7                   |
| <b>F</b> | <b>6-F1</b>    | <b>6-F2</b> | <b>6-F3</b>                | <b>6-F4</b>                | <b>6-F5</b> | <b>6-F6</b> | <b>6-F7</b> | <b>6-F8</b> | <b>6-F9</b> | <b>6-F10</b> | <b>6-F11</b> | <b>6-F12</b>           |
| %        | 99.7           | 74.5        | 98.7                       | 66.7                       | 75.7        | 89.7        | 71.4        | 71.6        | 92.8        | 92.3         | 98.6         | 72.7                   |
| <b>G</b> | <b>6-G1</b>    | <b>6-G2</b> | <b>6-G3</b>                | <b>6-G4</b>                | <b>6-G5</b> | <b>6-G6</b> | <b>6-G7</b> | <b>6-G8</b> | <b>6-G9</b> | <b>6-G10</b> | <b>6-G11</b> | <b>6-G12</b>           |
| %        | 79.6           | 68.1        | 76.3                       | 45.3                       | 69.5        | 96.3        | 77.0        | 96.9        | 84.3        | 75.8         | 45.6         | 42.1                   |
| <b>H</b> | <b>6-H1/D1</b> | <b>6-H2</b> | <b>6-H3</b>                | <b>6-H4</b>                | <b>6-H5</b> | <b>6-H6</b> | <b>6-H7</b> | <b>6-H8</b> | <b>6-H9</b> | <b>6-H10</b> | <b>6-H11</b> | <b>6-H12</b>           |
| %        | 101.8          | 76.4        | 58.4                       | 79.3                       | 83.7        | 68.5        | 100.4       | 87.2        | 59.7        | 87.1         | 100.6        | 89.0                   |
| <b>I</b> | <b>6-I1</b>    | <b>6-I2</b> | <b>6-I3</b>                | <b>6-I4</b>                | <b>6-I5</b> | <b>6-I6</b> | <b>6-I7</b> | <b>6-I8</b> | <b>6-I9</b> | <b>6-I10</b> | <b>6-I11</b> | <b>6-I12</b>           |
| %        | 93.0           | 59.1        | 100.8                      | 42.7                       | 45.9        | 78.3        | 99.0        | 99.9        | 83.9        | 63.5         | 69.4         | 33.2                   |
| <b>J</b> | <b>6-J1</b>    | <b>6-J2</b> | <b>6-J3</b>                | <b>6-J4</b>                | <b>6-J5</b> | <b>6-J6</b> | <b>6-J7</b> | <b>6-J8</b> | <b>6-J9</b> | <b>6-J10</b> | <b>6-J11</b> | <b>6-J12</b>           |
| %        | 66.9           | 53.0        | 75.3                       | 64.5                       | 49.7        | 60.7        | 61.9        | -17.5       | 99.9        | 83.6         | 33.2         | 85.4                   |
| <b>K</b> | <b>6-K1</b>    | <b>6-K2</b> | <b>6-K3</b>                | <b>6-K4</b>                | <b>6-K5</b> | <b>6-K6</b> | <b>6-K7</b> | <b>6-K8</b> | <b>6-K9</b> | <b>6-K10</b> | <b>6-K11</b> | <b>6-K12</b>           |
| %        | 92.6           | 58.4        | 84.9                       | 41.4                       | 69.0        | 75.3        | 84.0        | 53.8        | 99.2        | 81.2         | 23.9         | 65.6                   |
| <b>L</b> | <b>6-L1</b>    | <b>6-L2</b> | <b>6-L3</b>                | <b>6-L4</b>                | <b>6-L5</b> | <b>6-L6</b> | <b>6-L7</b> | <b>6-L8</b> | <b>6-L9</b> | <b>6-L10</b> | <b>6-L11</b> | <b>6-L12</b>           |
| %        | 45.1           | 47.4        | 72.0                       | 52.3                       | 73.3        | 85.8        | 82.4        | 95.7        | 62.6        | 87.6         | 96.1         | 54.5                   |
| <b>M</b> | <b>6-M1</b>    | <b>6-M2</b> | <b>6<sup>#</sup></b>       | <b>Blank<sup>iii</sup></b> | <b>6-M5</b> | <b>6-M6</b> | <b>6-M7</b> | <b>6-M8</b> | <b>6-M9</b> | <b>6-M10</b> | <b>6-M11</b> | <b>6-M12</b>           |
| %        | 15.1           | 12.2        | 23.5                       | 0.0                        | 40.9        | 22.4        | 44.8        | 76.5        | 18.4        | 36.2         | 100.1        | 0.1                    |
| <b>N</b> | <b>6-N1</b>    | <b>6-N2</b> | <b>6-N3</b>                | <b>6-N4</b>                | <b>6-N5</b> | <b>6-N6</b> | <b>6-N7</b> | <b>6-N8</b> | <b>6-N9</b> | <b>6-N10</b> | <b>6-N11</b> | <b>6-N12</b>           |
| %        | 29.9           | 96.0        | 97.0                       | 95.6                       | 80.4        | 23.7        | 30.5        | 93.4        | 85.6        | 39.0         | 71.3         | 84.8                   |

|          |             |             |             |                |                |             |             |             |             |                 |              |                    |
|----------|-------------|-------------|-------------|----------------|----------------|-------------|-------------|-------------|-------------|-----------------|--------------|--------------------|
| <b>O</b> | <b>6-O1</b> | <b>6-O2</b> | <b>6-O3</b> | <b>6-O4</b>    | <b>6-O5</b>    | <b>6-O6</b> | <b>6-O7</b> | <b>6-O8</b> | <b>6-O9</b> | <b>6-O10</b>    | <b>6-O11</b> | <b>6-O12</b>       |
| %        | 21.8        | 13.9        | 26.3        | 10.4           | 47.9           | 31.2        | 54.7        | 82.5        | 28.2        | 42.8            | 98.5         | 6.9                |
| <b>P</b> | <b>6-P1</b> | <b>6-P2</b> | <b>6-P3</b> | <b>6-P4</b>    | <b>6-P5/G8</b> | <b>6-P6</b> | <b>6-P7</b> | <b>6-P8</b> | <b>6-P9</b> | <b>6-P10</b>    | <b>6-P11</b> | <b>6-P12</b>       |
| %        | 41.2        | 94.2        | 99.5        | 94.5           | 85.4           | 27.0        | 31.0        | 95.3        | 87.6        | 39.8            | 71.4         | 84.0               |
| <b>Q</b> | <b>6-Q1</b> | <b>6-Q2</b> | <b>6-Q3</b> | <b>6-Q4/G6</b> | <b>6-Q5</b>    | <b>6-Q6</b> | <b>6-Q7</b> | <b>6-Q8</b> | <b>6-Q9</b> | <b>6-Q10</b>    | <b>6-Q11</b> | <b>6-Q12</b>       |
| %        | 38.8        | 35.7        | 55.8        | 79.9           | 87.0           | 39.4        | 49.6        | 67.4        | 99.4        | 59.5            | 71.7         | 91.8               |
| <b>R</b> | <b>6-R1</b> | <b>6-R2</b> | <b>6-R3</b> | <b>6-R4</b>    | <b>6-R5</b>    | <b>6-R6</b> | <b>6-R7</b> | <b>6-R8</b> | <b>6-R9</b> | <b>6-R10/I7</b> | <b>6-R11</b> | <b>6-R12</b>       |
| %        | 52.0        | 41.5        | 40.7        | 61.8           | 71.4           | 32.7        | 101.6       | 50.6        | 70.5        | 96.6            | 100.7        | 18.8               |
| <b>S</b> | <b>6-S1</b> | <b>6-S2</b> | <b>6-S3</b> | <b>6-S4</b>    | <b>6-S5</b>    | <b>6-S6</b> | <b>6-S7</b> | <b>6-S8</b> | <b>6-S9</b> | <b>6-S10</b>    | <b>6-S11</b> | <b>6-S12</b>       |
| %        | 28.9        | 91.9        | 39.0        | 32.5           | 37.6           | 80.8        | 45.8        | 59.3        | 38.6        | 67.1            | 91.7         | 52.7               |
| <b>T</b> | <b>6-T1</b> | <b>6-T2</b> | <b>6-T3</b> | <b>6-T4</b>    | <b>6-T5</b>    | <b>6-T6</b> | <b>6-T7</b> | <b>6-T8</b> | <b>6-T9</b> | <b>6-T10</b>    | <b>6-T11</b> | <b>6-T12/D1/H1</b> |
| %        | 101.9       | 17.2        | 101.9       | 47.3           | 31.4           | 42.5        | 30.4        | 36.9        | 62.3        | 59.4            | 63.0         | 101.1              |

Notes: <sup>i</sup>See Figure S1. The oximes were evaluated by gel-based TDP1 fluorescence assay in a concentration of 100  $\mu$ M in DMSO. The fluorescence of DMSO blank vial was set as 0 and the fluorescence for the reference without TDP1 was set as 100%. Oximes **6-M1-T12** (30  $\mu$ L, 10 mM in DMSO) were prepared based on the following method. A mixture of aminoxy-containing **6** (10  $\mu$ L, 30 mM in DMSO), aldehydes **M1-T12** (10  $\mu$ L, 30 mM in DMSO) and acetic acid (10  $\mu$ L, 150 mM in DMSO) was agitated at room temperature overnight. The formed oximes **6-M1-T12** (30  $\mu$ L, 10 mM in DMSO) were diluted to 100  $\mu$ M in DMSO and evaluated by gel-based TDP1 assay. <sup>ii</sup>Aminoxy-containing **6** (10 mM) and HOAc (50 mM). <sup>iii</sup> Blank: HOAc (50 mM in DMSO).

**Table S4.** X-ray Data Collection and Refinement Statistics.

|                                                 | <b>TDP1-XZ761 (9a)</b>         | <b>TDP1-XZ760 (9c) complex</b> |
|-------------------------------------------------|--------------------------------|--------------------------------|
| <i>Data collection Statistics</i>               |                                |                                |
| Diffraction source                              | SER-CAT, 22-BM                 | SER-CAT, 22-BM                 |
| Wavelength (Å)                                  | 1.0000                         | 1.0000                         |
| Temperature (K)                                 | 100                            | 100                            |
| Detector                                        | Rayonix MX300-HS               | Rayonix MX300-HS               |
| Space group                                     | $P2_12_12_1$                   | $P2_12_12_1$                   |
| Unit cell parameters                            |                                |                                |
| a=, b=, c= (Å)                                  | 49.80, 105.01, 192.90          | 49.73, 104.76, 193.21          |
| $\alpha = \beta = \gamma =$ (°)                 | 90                             | 90                             |
| Resolution range (Å)                            | 50-1.65 (1.68-1.65)            | 50-1.81(1.84-1.81)*            |
| Total reflections                               | 888797                         | 593632                         |
| Unique reflections                              | 122399 (6022)                  | 89034 (4242)                   |
| Completeness (%)                                | 100 (99.9)                     | 95.9 (91.4)                    |
| Multiplicity                                    | 7.3 (5.7)                      | 6.7 (6.6)                      |
| Mean $I/\sigma(I)$                              | 20.2 (2.1)                     | 21.9 (2.1)                     |
| $R_{\text{merge}}$                              | 0.110 (0.724)                  | 0.075 (0.692)                  |
| $R_{\text{p.i.m.}}$                             | 0.044 (0.319)                  | 0.031 (0.280)                  |
| $CC_{1/2}$                                      | 0.994 (0.853)                  | 0.997 (0.861)                  |
| <i>Refinement Statistics</i>                    |                                |                                |
| Resolution range (Å)                            | 46.12-1.65 (1.67-1.65)         | 40.64-1.81(1.83-1.81)          |
| Number of reflections                           | 122293                         | 88944                          |
| Number of reflections used in $R_{\text{free}}$ | 6086                           | 4399                           |
| Final $R_{\text{work}}$                         | 0.167 (0.241)                  | 0.156 (0.229)                  |
| Final $R_{\text{free}}$                         | 0.194 (0.266)                  | 0.191 (0.263)                  |
| Number of non-H atoms                           |                                |                                |
| Protein, chain A                                | 3652                           | 3612                           |
| Protein, chain B                                | 3622                           | 3629                           |
| XZ760                                           |                                | 50 (chain A), 35 (chain B)     |
| XZ761                                           | 34 (chain A), 34 (chain B)     |                                |
| Ethylene glycol                                 | 28                             | 20                             |
| DMSO                                            |                                | 4                              |
| MOPS                                            | 26                             | 13                             |
| Water                                           | 793                            | 699                            |
| Average $B$ factors (Å <sup>2</sup> )           |                                |                                |
| Protein chain A                                 | 19.3                           | 25.6                           |
| Protein chain B                                 | 25.5                           | 32.4                           |
| XZ760 (9c)                                      |                                | 38.0 (chain A), 46.3 (chain B) |
| XZ761 (9a)                                      | 25.7 (chain A), 31.3 (chain B) |                                |
| MOPS                                            | 24.3                           | 30.7                           |
| Ethylene glycol                                 | 26.5                           | 30.7                           |
| DMSO                                            |                                | 55.0                           |
| Water                                           | 35.2                           | 40.3                           |
| Estimated coordinate error (Å)                  | 0.17                           | 0.16                           |
| R.m.s. deviations from ideal                    |                                |                                |
| Bond lengths (Å)                                | 0.006                          | 0.006                          |

|                                                                     |                                    |                                     |
|---------------------------------------------------------------------|------------------------------------|-------------------------------------|
| Bond angles (°)                                                     | 0.86                               | 0.83                                |
| Ramachandran plot                                                   |                                    |                                     |
| Favored (%)                                                         | 98.0                               | 97.7                                |
| Allowed (%)                                                         | 1.9                                | 2.3                                 |
| Outliers (%)                                                        | 0.1                                | 0                                   |
| <i>MolProbity</i> Analysis                                          |                                    |                                     |
| Clashscore, all atoms                                               | 3.0 (98 <sup>th</sup> percentile)  | 2.61 (99 <sup>th</sup> percentile)  |
| Protein geometry score                                              | 1.09 (99 <sup>th</sup> percentile) | 1.07 (100 <sup>th</sup> percentile) |
| PDB deposition code                                                 | 8CVQ                               | 8CW2                                |
| *Values in parenthesis are for the highest resolution shell of data |                                    |                                     |

**Table S5.** TDP1 selectivity of lead compounds over TDP2 using gel-based assays *in vitro*.

| Compound        | TDP1 IC <sub>50</sub> (μM) <sup>i</sup> | TDP2 IC <sub>50</sub> (μM) <sup>ii</sup> | TDP1 Selectivity <sup>iii</sup> |
|-----------------|-----------------------------------------|------------------------------------------|---------------------------------|
| <b>(E)-6-D1</b> | 0.38 ± 0.06                             | 28.1 ± 8.9                               | 74                              |
| <b>7d</b>       | 3.1 ± 0.2                               | 25.9 ± 0.4                               | 8                               |
| <b>8b</b>       | 2.75 ± 0.25                             | >100                                     | >36                             |

Note: <sup>i</sup>The half maximal inhibitory concentration (IC<sub>50</sub>) based on gel based TDP1 fluorescence

assay. <sup>ii</sup>The half maximal inhibitory concentration (IC<sub>50</sub>) based on gel based TDP2 fluorescence

assay. <sup>iii</sup>TDP1 selectivity based on the ratio of IC<sub>50</sub> values of TDP1/TDP2.

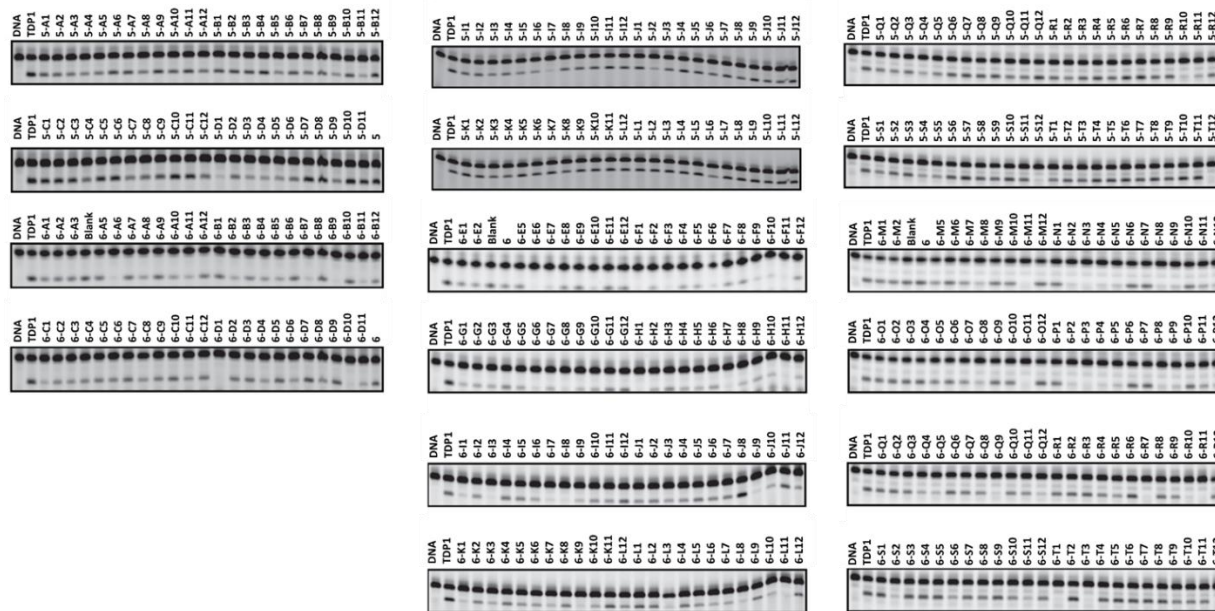

**Fig. S1** Primary screen of oximes **5-Y** and **6-Y** in gel-based TDP1 binding assays (TDP1 40 pM, DNA Cy5N14Y 1 nM, Drug 100  $\mu$ M).

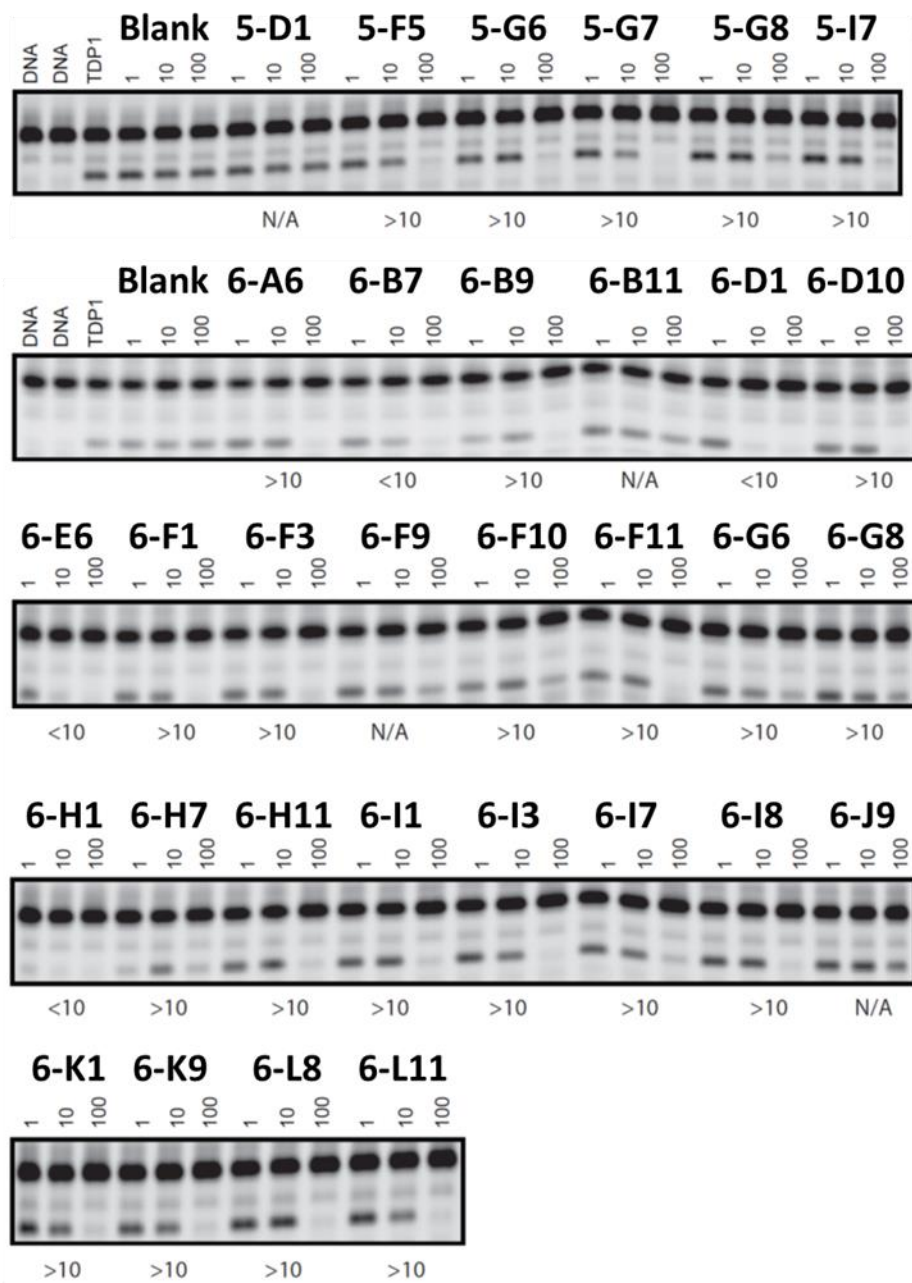

**Fig. S2** Secondary screen of oximes **5-Y** and **6-Y** in gel-based TDP1 binding assays (TDP1: 40 pM, DNA Cy5N14Y: 1 nM, Drug: 1, 10, 100 μM). Oximes from aldehydes B7, D1 (H1), E6, M10, P3 show less than 10 μM TDP1 inhibition.



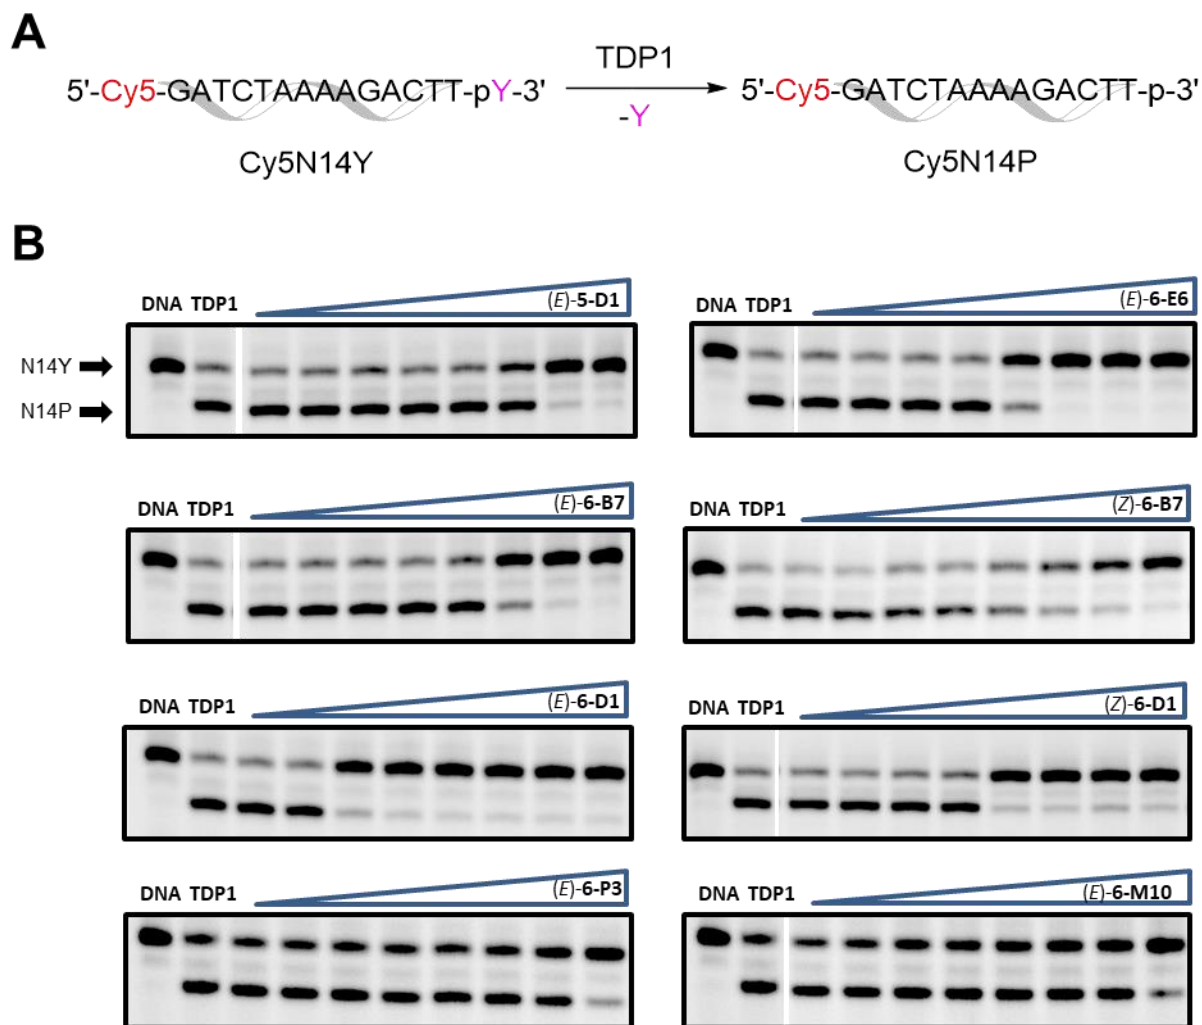

**Fig. S3** TDP1 catalytic reaction and representative gel images. (A) Scheme of the TDP1 catalytic reaction applied in the gel assay. (B) Representative gels showing the inhibition of full-length TDP1-catalyzed hydrolysis by the oxime leads. In each gel: lane 1, Cy5N14Y only; lane 2, Cy5N14Y and TDP1; lanes 3-10, 3-fold serial dilutions of the oxime leads from 0.05  $\mu\text{M}$  to 111  $\mu\text{M}$ .

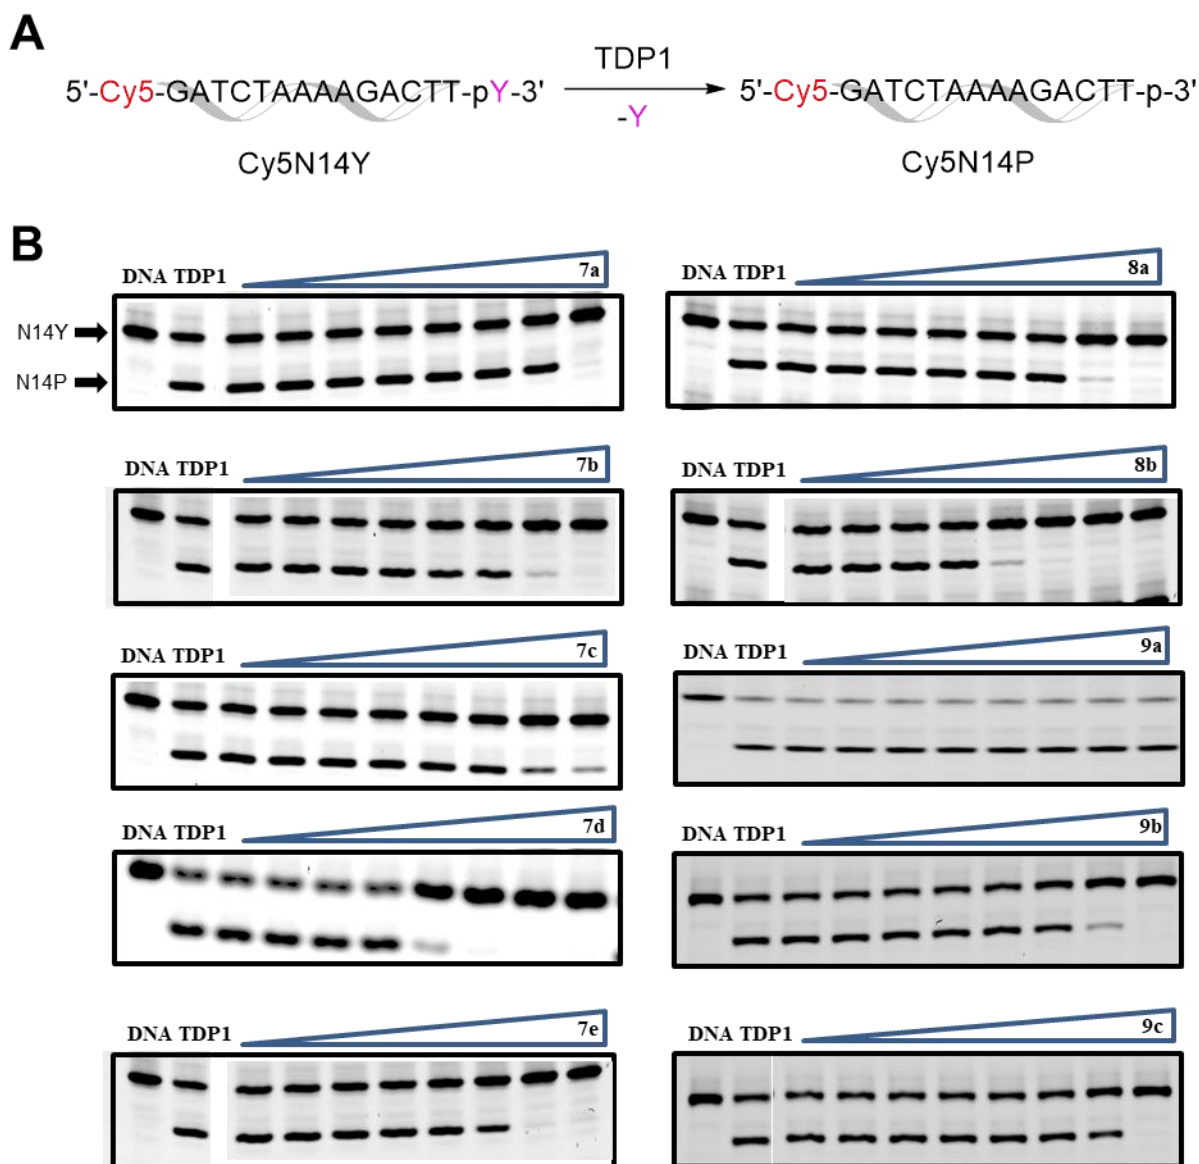

**Fig. S4** TDP1 catalytic reaction and representative gel images. (A) Scheme of the TDP1 catalytic reaction applied in the gel assay. (B) Representative gels showing the inhibition of full-length TDP1-catalyzed hydrolysis by isosteres **7a-e**, **8a,b** and **9a-c**. In each gel: lane 1, Cy5N14Y only; lane 2, Cy5N14Y and TDP1; lanes 3-10, 3-fold serial dilutions of drugs from 0.05  $\mu\text{M}$  to 111  $\mu\text{M}$ .

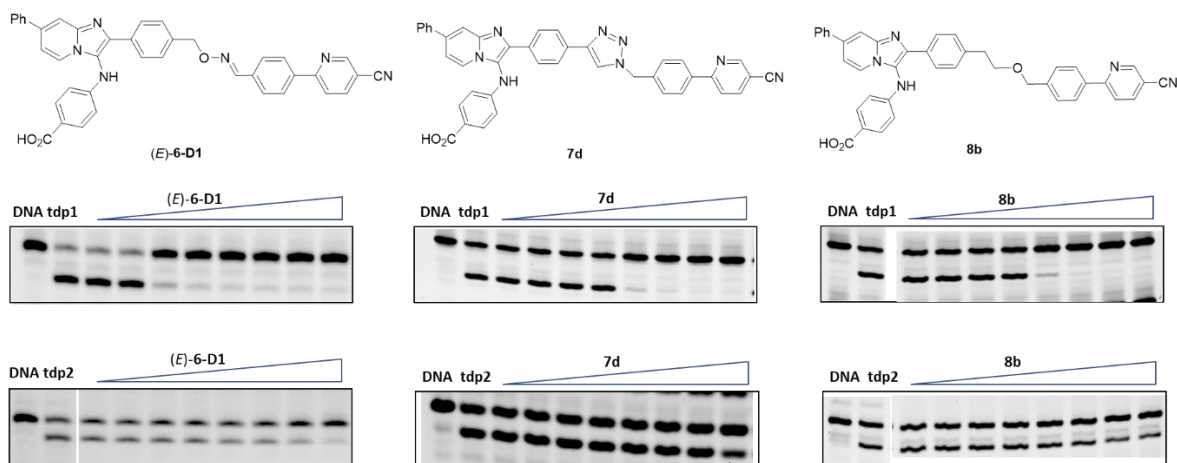

**Fig. S5.** TDP1 and TDP2 catalytic reaction and representative gel images showing the inhibition of oxime (*E*)-**6-D1**, triazole **7d** and ether **8b**. In each gel: lane 1, Cy5N14Y only; lane 2, Cy5N14Y and TDP1; lanes 3-10, 3-fold serial dilutions of drugs from 0.05  $\mu\text{M}$  to 111  $\mu\text{M}$ .

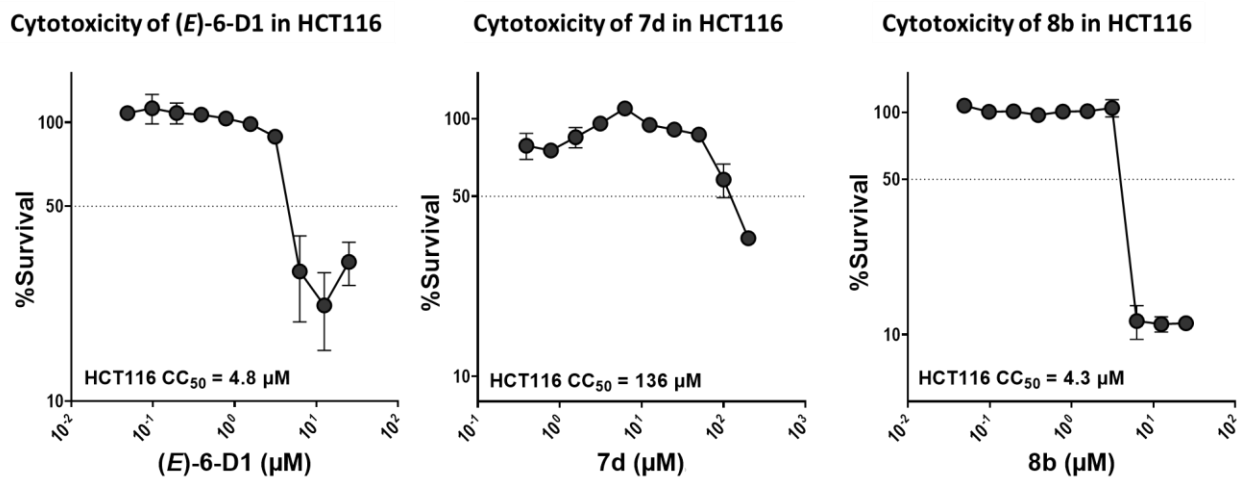

**Fig. S6.** Cytotoxicity of selective TDP1 inhibitors oxime (*E*)-**6-D1**, triazole **7d** and ether **8b** in human colon cancer cell line HCT116 based on cell viability.

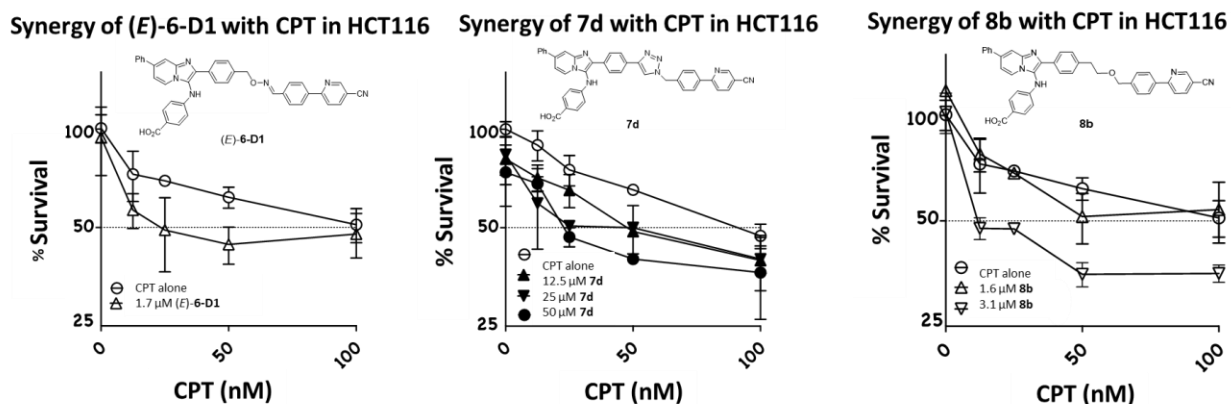

**Fig. S7.** Synergistic effect of selective TDP1 inhibitors with camptothecin (CPT) in human colon cancer cell line HCT116 based on cell viability.

## REFERENCES

1. O. Mitsunobu, *Synthesis*, 1981, DOI: 10.1055/s-1981-29317, 1-28.
2. H. Bienayme and K. Bouzid, *Angew. Chem., Int. Ed.*, 1998, **37**, 2234-2237.
3. C. Blackburn, B. Guan, P. Fleming, K. Shiosaki and S. Tsai, *Tetrahedron Lett.*, 1998, **39**, 3635-3638.
4. K. Groebke, L. Weber and F. Mehlh, *Synlett*, 1998, **1998**, 661-663.
5. S. Shaaban and B. F. Abdel-Wahab, *Mol. Diversity*, 2016, **20**, 233-254.
6. X. Z. Zhao, E. Kiselev, G. T. Lountos, W. Wang, J. E. Tropea, D. Needle, T. A. Hilimire, J. S. Schneekloth, D. S. Waugh, Y. Pommier and T. R. Burke, *Chem. Sci.*, 2021, **12**, 3876-3884.
7. R. P. Wurz, K. Dellamaggiore, H. Dou, N. Javier, M.-C. Lo, J. D. McCarter, D. Mohl, C. Sastri, J. R. Lipford and V. J. Cee, *J. Med. Chem.*, 2018, **61**, 453-461.
8. J. W. Gathirwa and T. Maki, *Tetrahedron*, 2012, **68**, 370-375.

9. G. T. Lountos, X. Z. Zhao, T. R. Burke, E. Kiselev, Y. Pommier, J. E. Tropea, D. Needle and D. S. Waugh, *Nucleic Acids Res*, 2019, **47**, 10134-10150.
10. X. Z. Zhao, W. Wang, G. T. Lountos, J. E. Tropea, D. Needle, Y. Pommier and T. R. Burke, *Frontiers in Chemistry*, 2022, **10**, 910953.
11. W. Minor, M. Cymborowski, Z. Otwinowski and M. Chruszcz, *Acta Crystallogr., Sect. D: Biol. Crystallogr.*, 2006, **D62**, 859-866.
12. A. J. McCoy, R. W. Grosse-Kunstleve, P. D. Adams, M. D. Winn, L. C. Storoni and R. J. Read, *J. Appl. Crystallogr.*, 2007, **40**, 658-674.
13. P. H. Zwart, P. V. Afonine, R. W. Grosse-Kunstleve, L.-W. Hung, T. R. Ioerger, A. J. McCoy, E. McKee, N. W. Moriarty, R. J. Read, J. C. Sacchettini, N. K. Sauter, L. C. Storoni, T. C. Terwilliger and P. D. Adams, *Methods Mol. Biol. (Totowa, NJ, U. S.)*, 2008, **426**, 419-435.
14. N. W. Moriarty, R. W. Grosse-Kunstleve and P. D. Adams, *Acta Crystallogr., Sect. D: Biol. Crystallogr.*, 2009, **65**, 1074-1080.
15. C. J. Williams, J. J. Headd, N. W. Moriarty, M. G. Prisant, L. L. Videau, L. N. Deis, V. Verma, D. A. Keedy, B. J. Hintze, V. B. Chen, S. Jain, S. M. Lewis, W. B. Arendall, III, J. Snoeyink, P. D. Adams, S. C. Lovell, J. S. Richardson and D. C. Richardson, *Protein Sci.*, 2018, **27**, 293-315.
16. P. V. Afonine, R. W. Grosse-Kunstleve, N. Echols, J. J. Headd, N. W. Moriarty, M. Mustyakimov, T. C. Terwilliger, A. Urzhumtsev, P. H. Zwart and P. D. Adams, *Acta Crystallogr., Sect. D: Biol. Crystallogr.*, 2012, **68**, 352-367.
